# Supplementary material for: The level of embryonation influences detection of Ostertagia ostertagi eggs by semi-quantitative PCR
Source: PubMed Central journal article supplement (PMC4928311; doi:10.1186/s13071-016-1657-4), 2016-06-29
Supplement: 13071_2016_1657_MOESM1_ESM.pdf [file 13071_2016_1657_MOESM1_ESM.pdf]

# S1

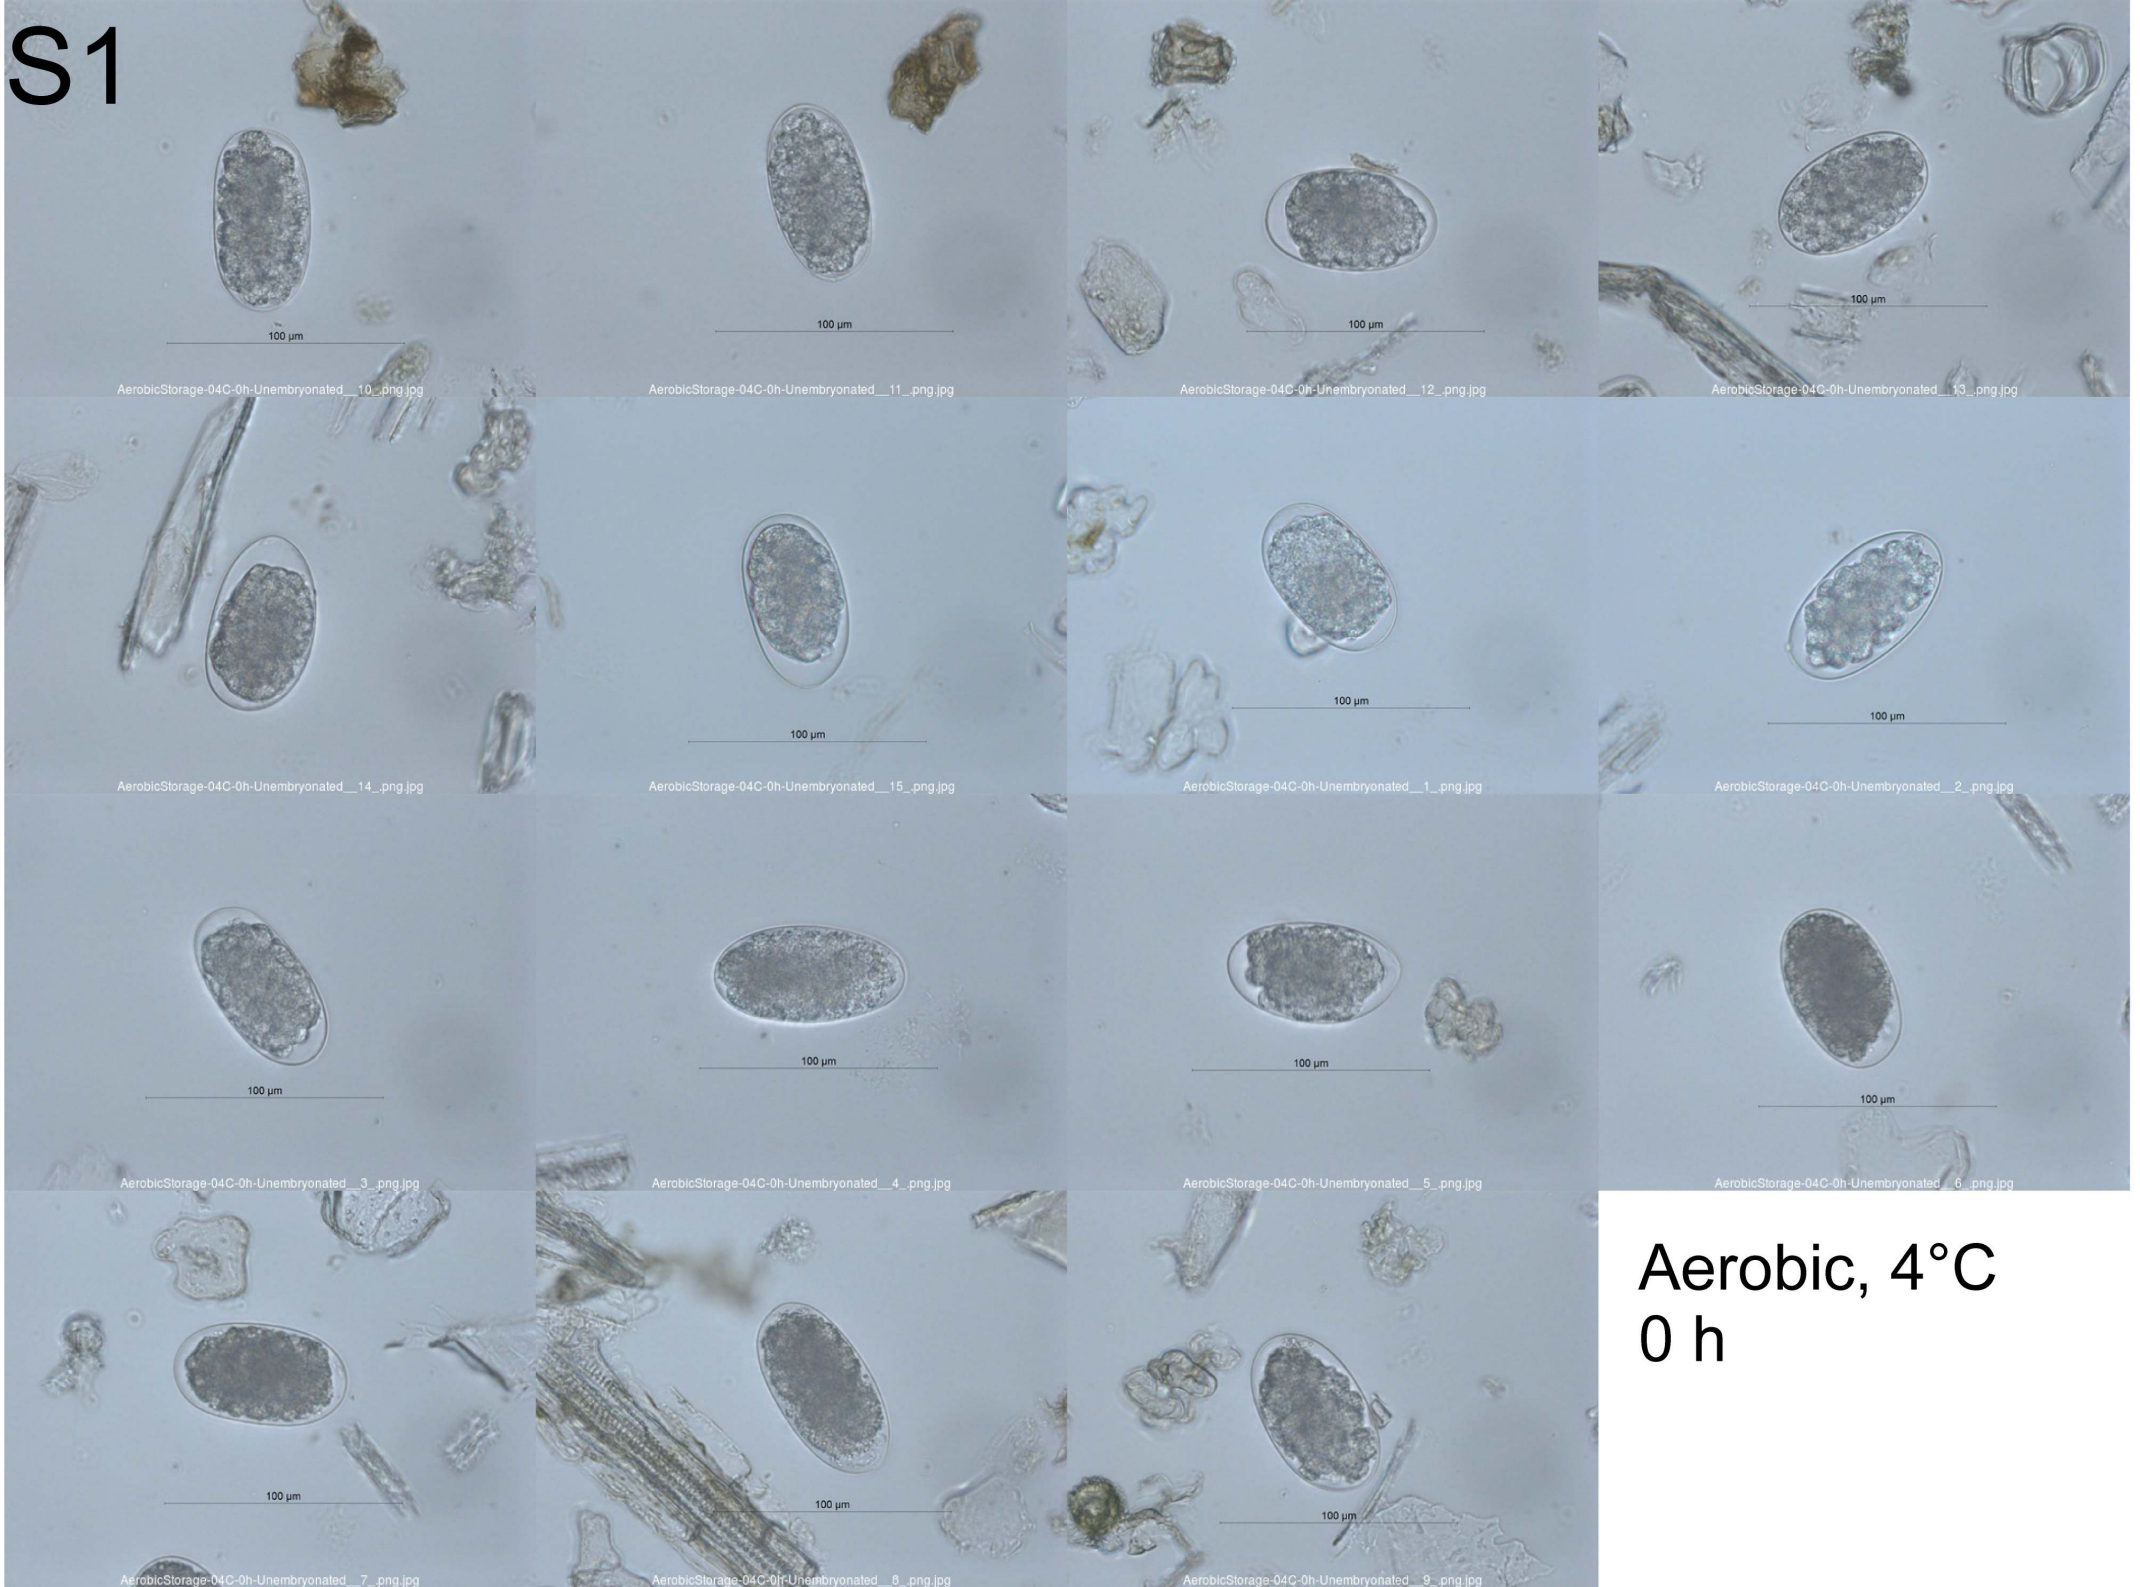

**Aerobic, 4°C  
0 h**

# S2

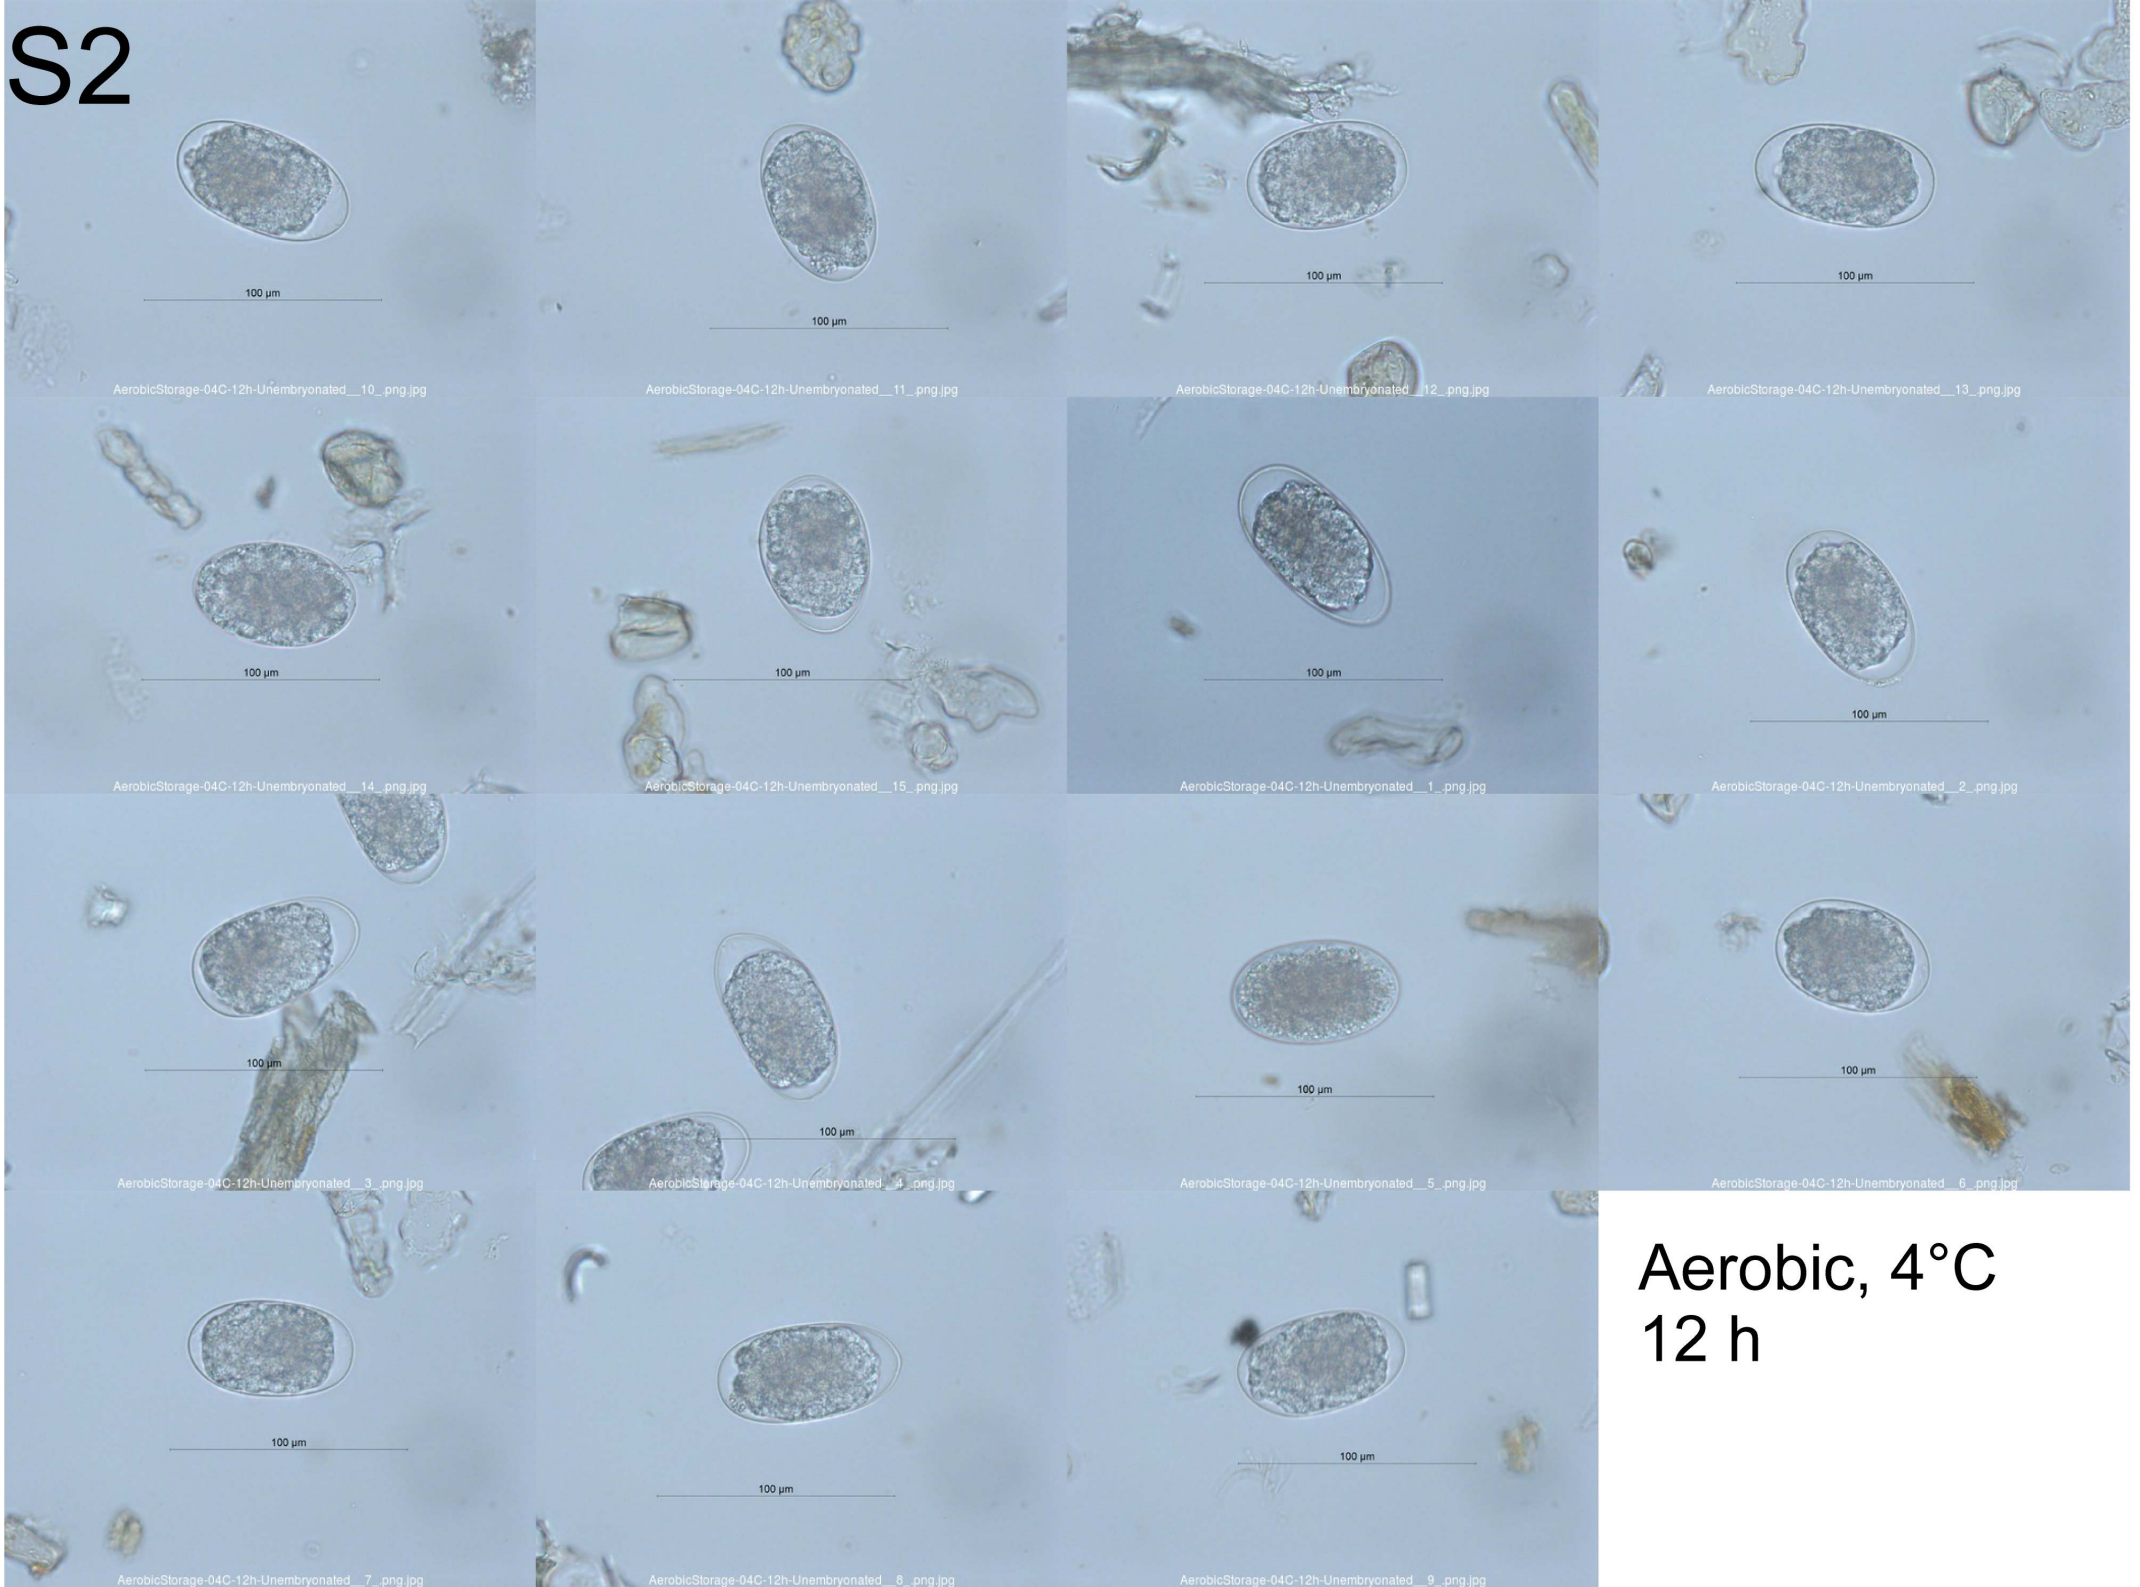

Aerobic, 4°C  
12 h





# S4

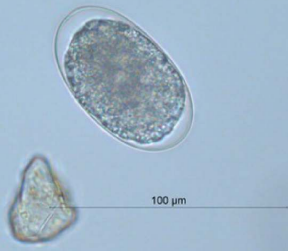

AerobicStorage-04C-36h-Unembryonated\_\_10\_.png.jpg

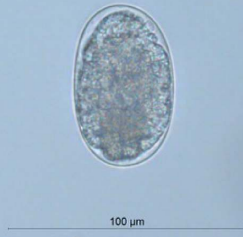

AerobicStorage-04C-36h-Unembryonated\_\_11\_.png.jpg

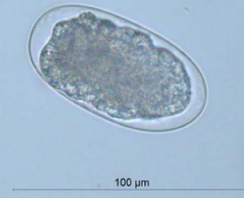

AerobicStorage-04C-36h-Unembryonated\_\_12\_.png.jpg

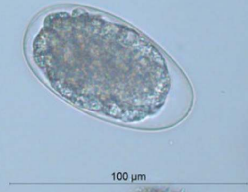

AerobicStorage-04C-36h-Unembryonated\_\_13\_.png.jpg

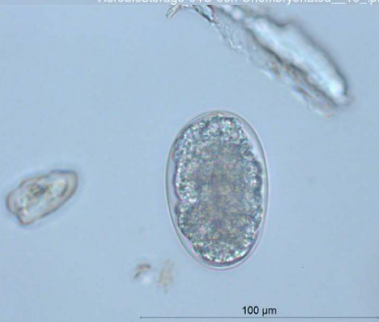

AerobicStorage-04C-36h-Unembryonated\_\_14\_.png.jpg

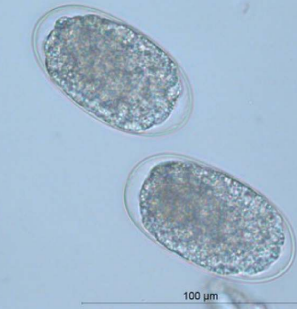

AerobicStorage-04C-36h-Unembryonated\_\_15\_.png.jpg

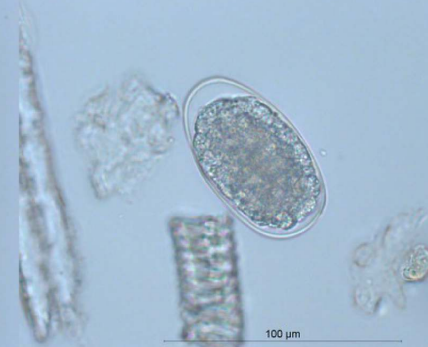

AerobicStorage-04C-36h-Unembryonated\_\_1\_.png.jpg

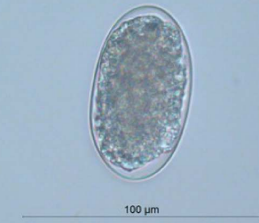

AerobicStorage-04C-36h-Unembryonated\_\_2\_.png.jpg

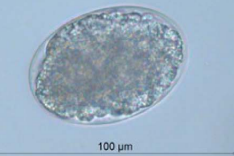

AerobicStorage-04C-36h-Unembryonated\_\_3\_.png.jpg

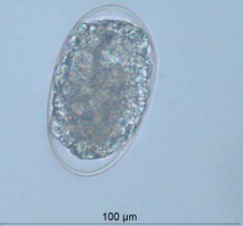

AerobicStorage-04C-36h-Unembryonated\_\_4\_.png.jpg

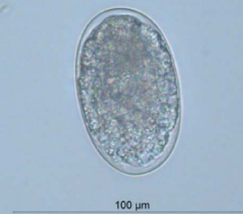

AerobicStorage-04C-36h-Unembryonated\_\_5\_.png.jpg

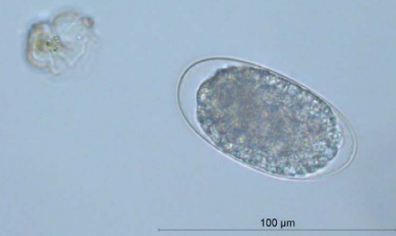

AerobicStorage-04C-36h-Unembryonated\_\_6\_.png.jpg

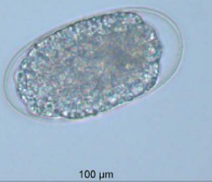

AerobicStorage-04C-36h-Unembryonated\_\_7\_.png.jpg

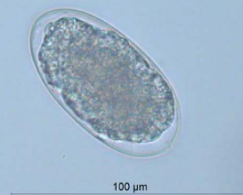

AerobicStorage-04C-36h-Unembryonated\_\_8\_.png.jpg

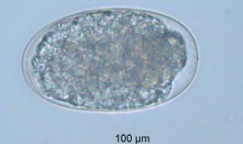

AerobicStorage-04C-36h-Unembryonated\_\_9\_.png.jpg

Aerobic, 4°C  
36 h



S5

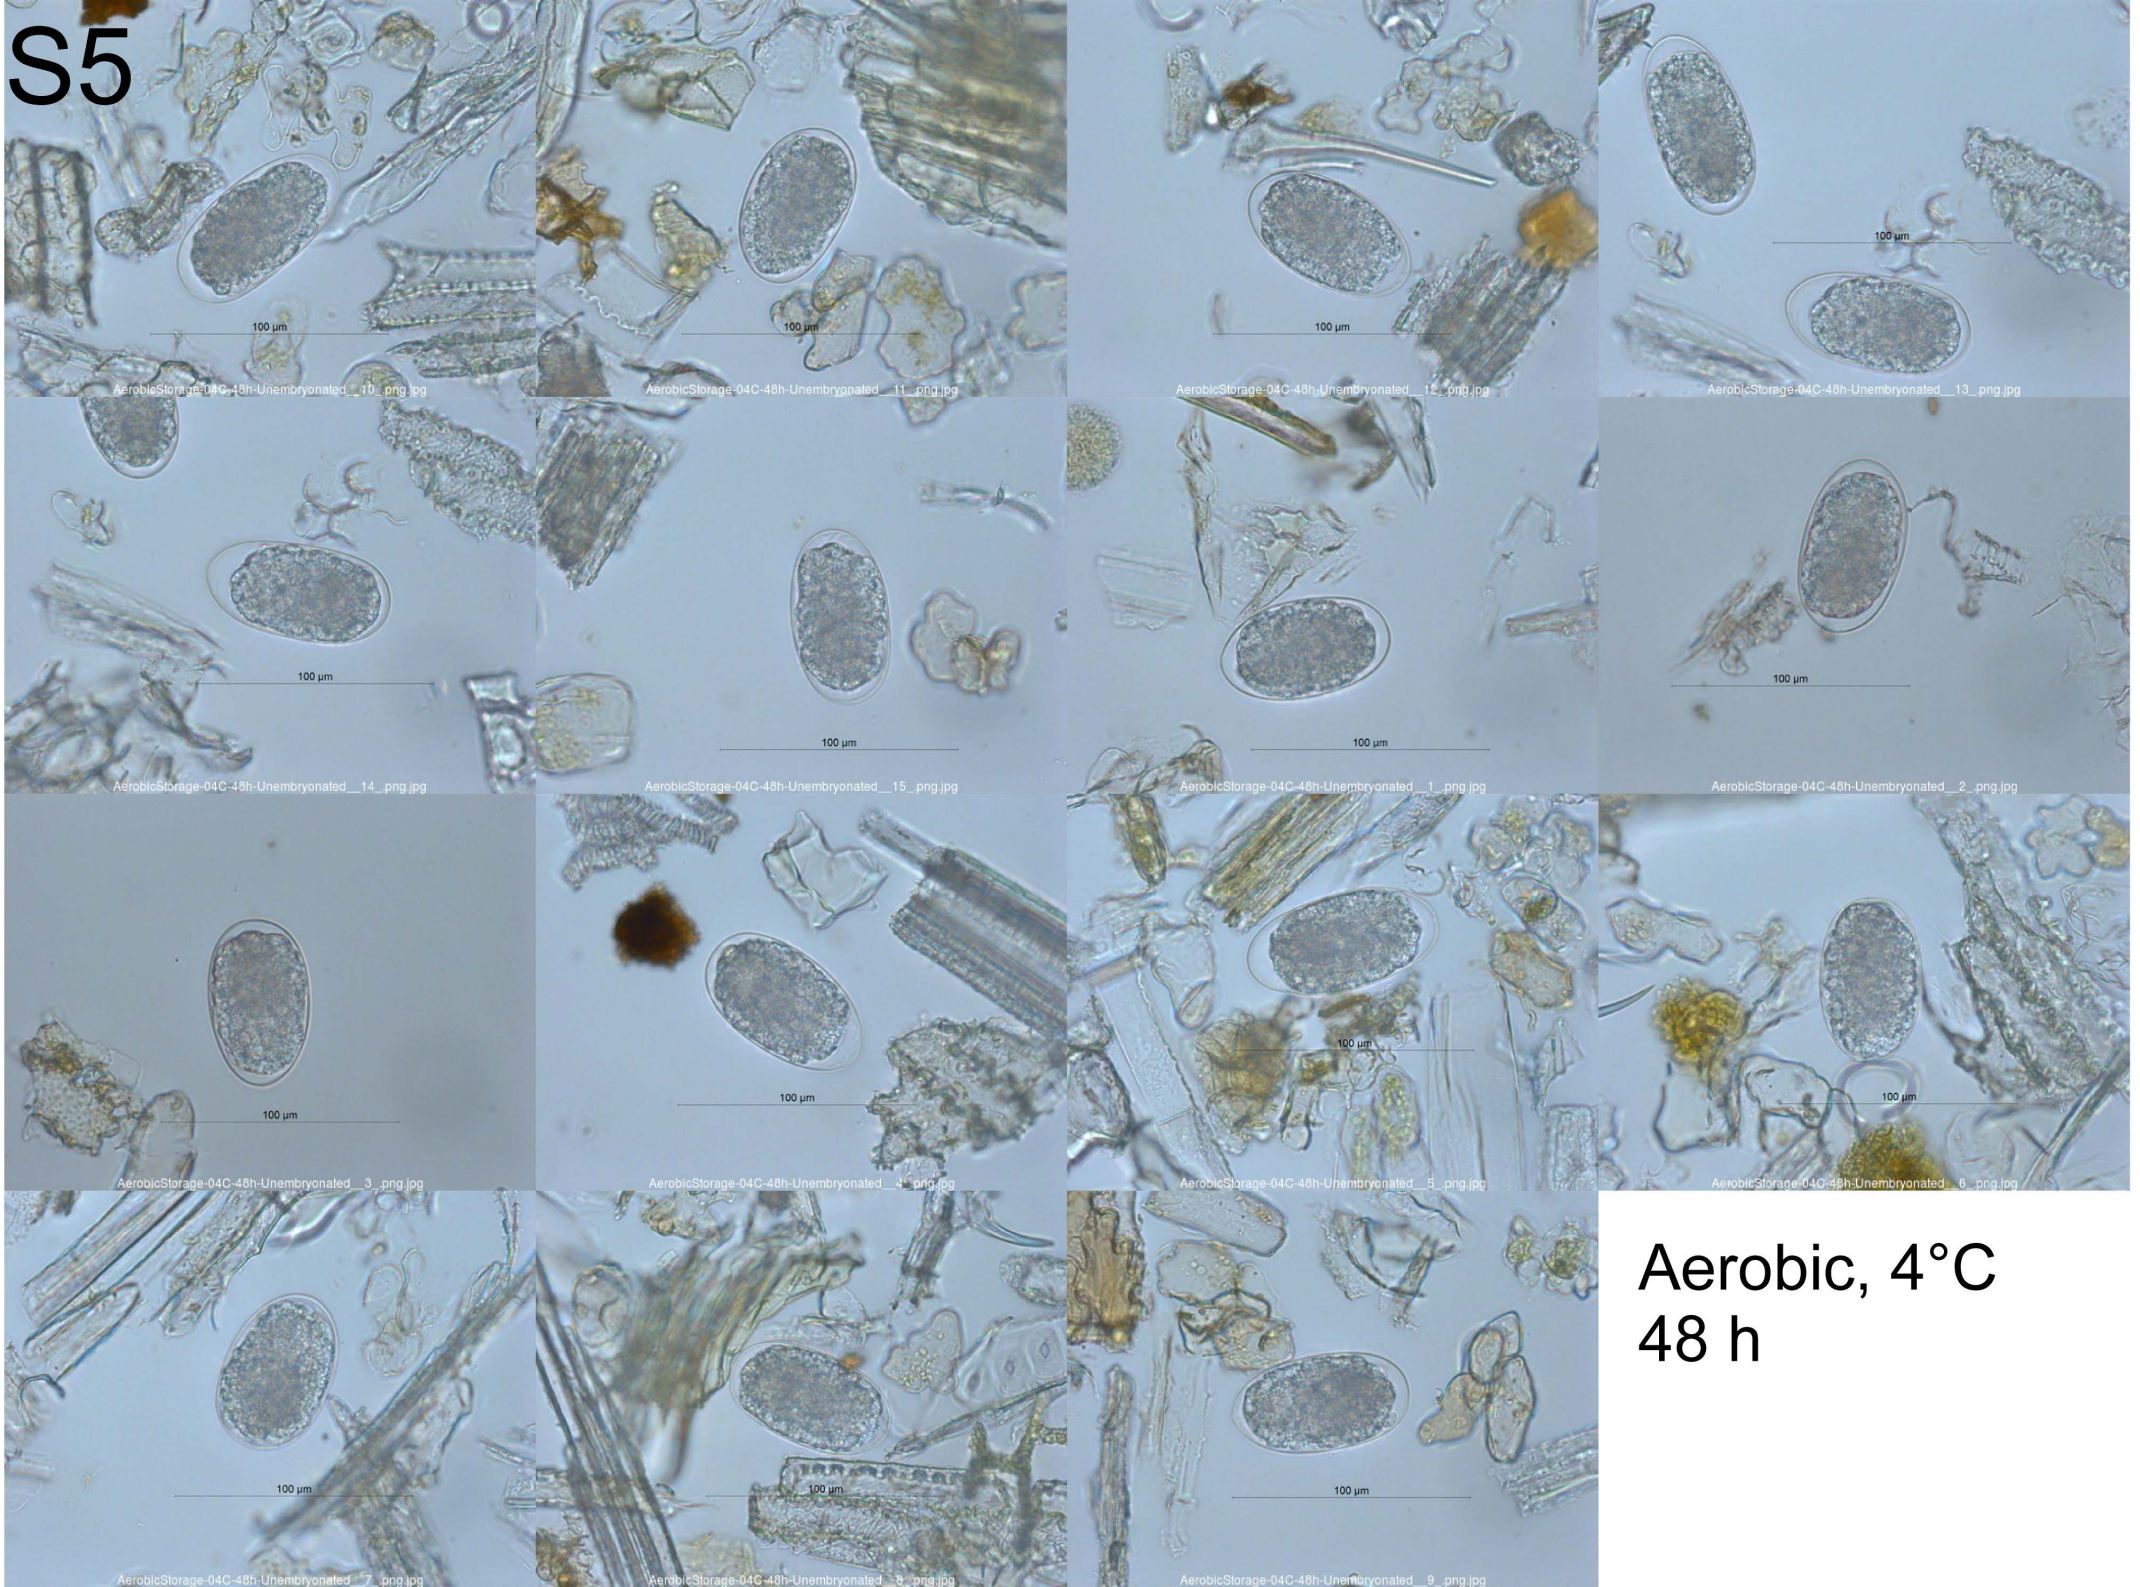

Aerobic, 4°C  
48 h



# S6

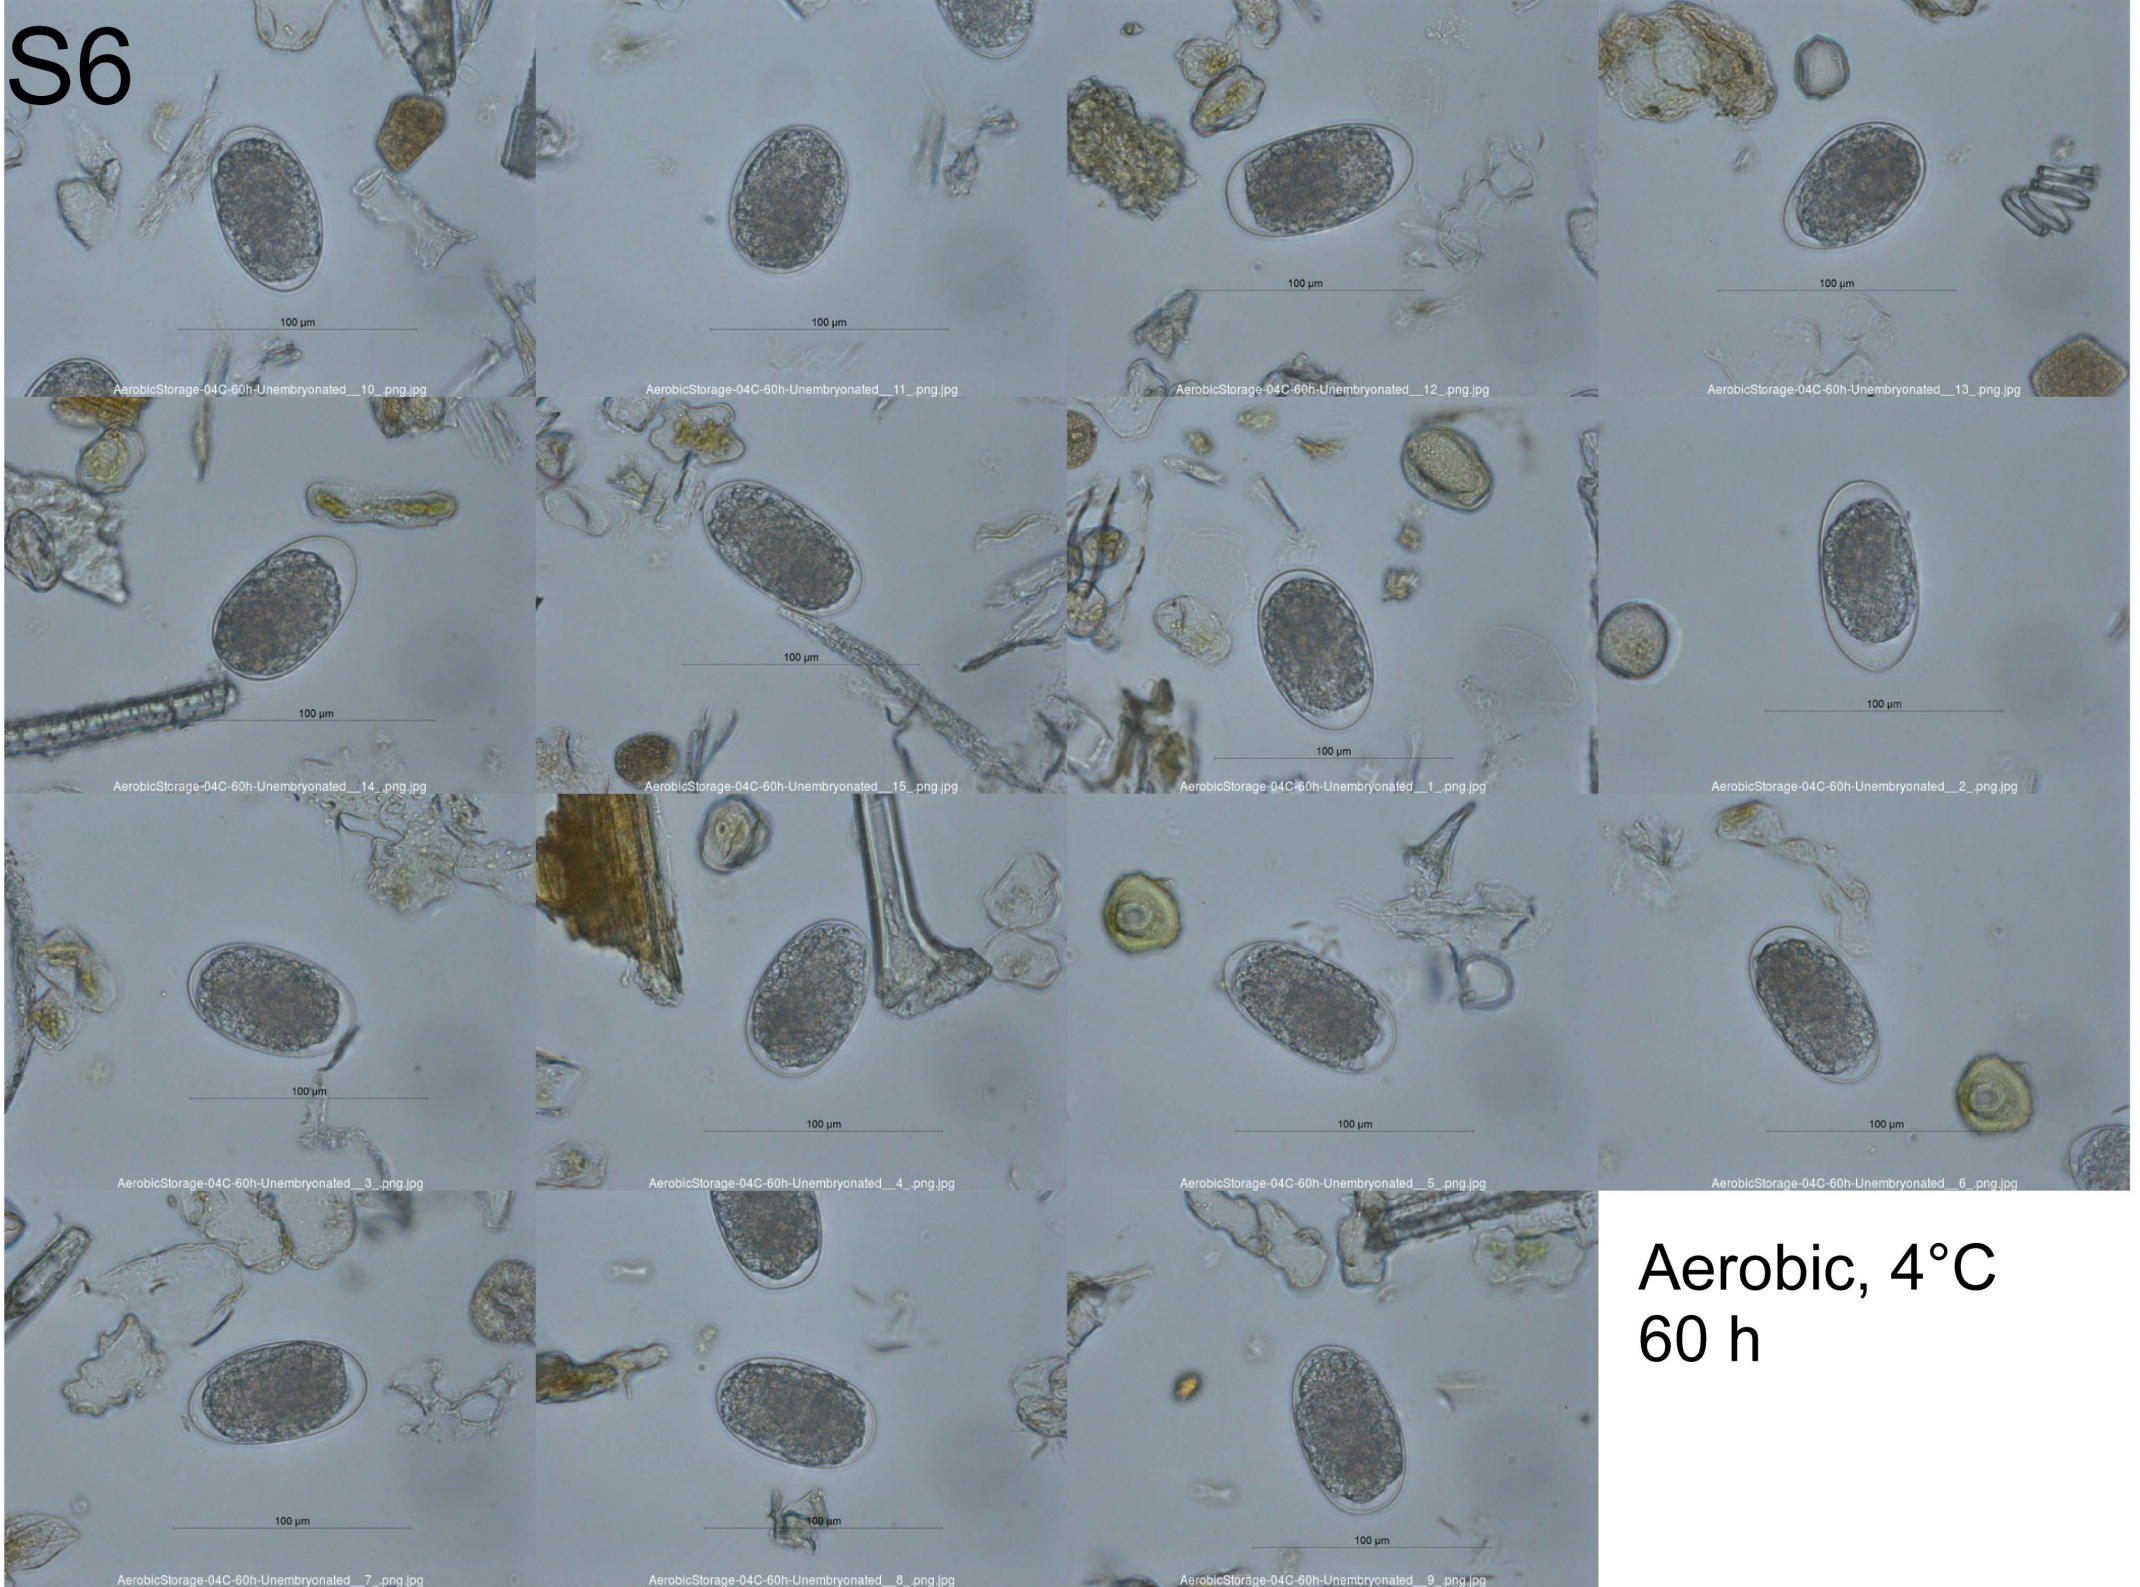

Aerobic, 4°C  
60 h



S7

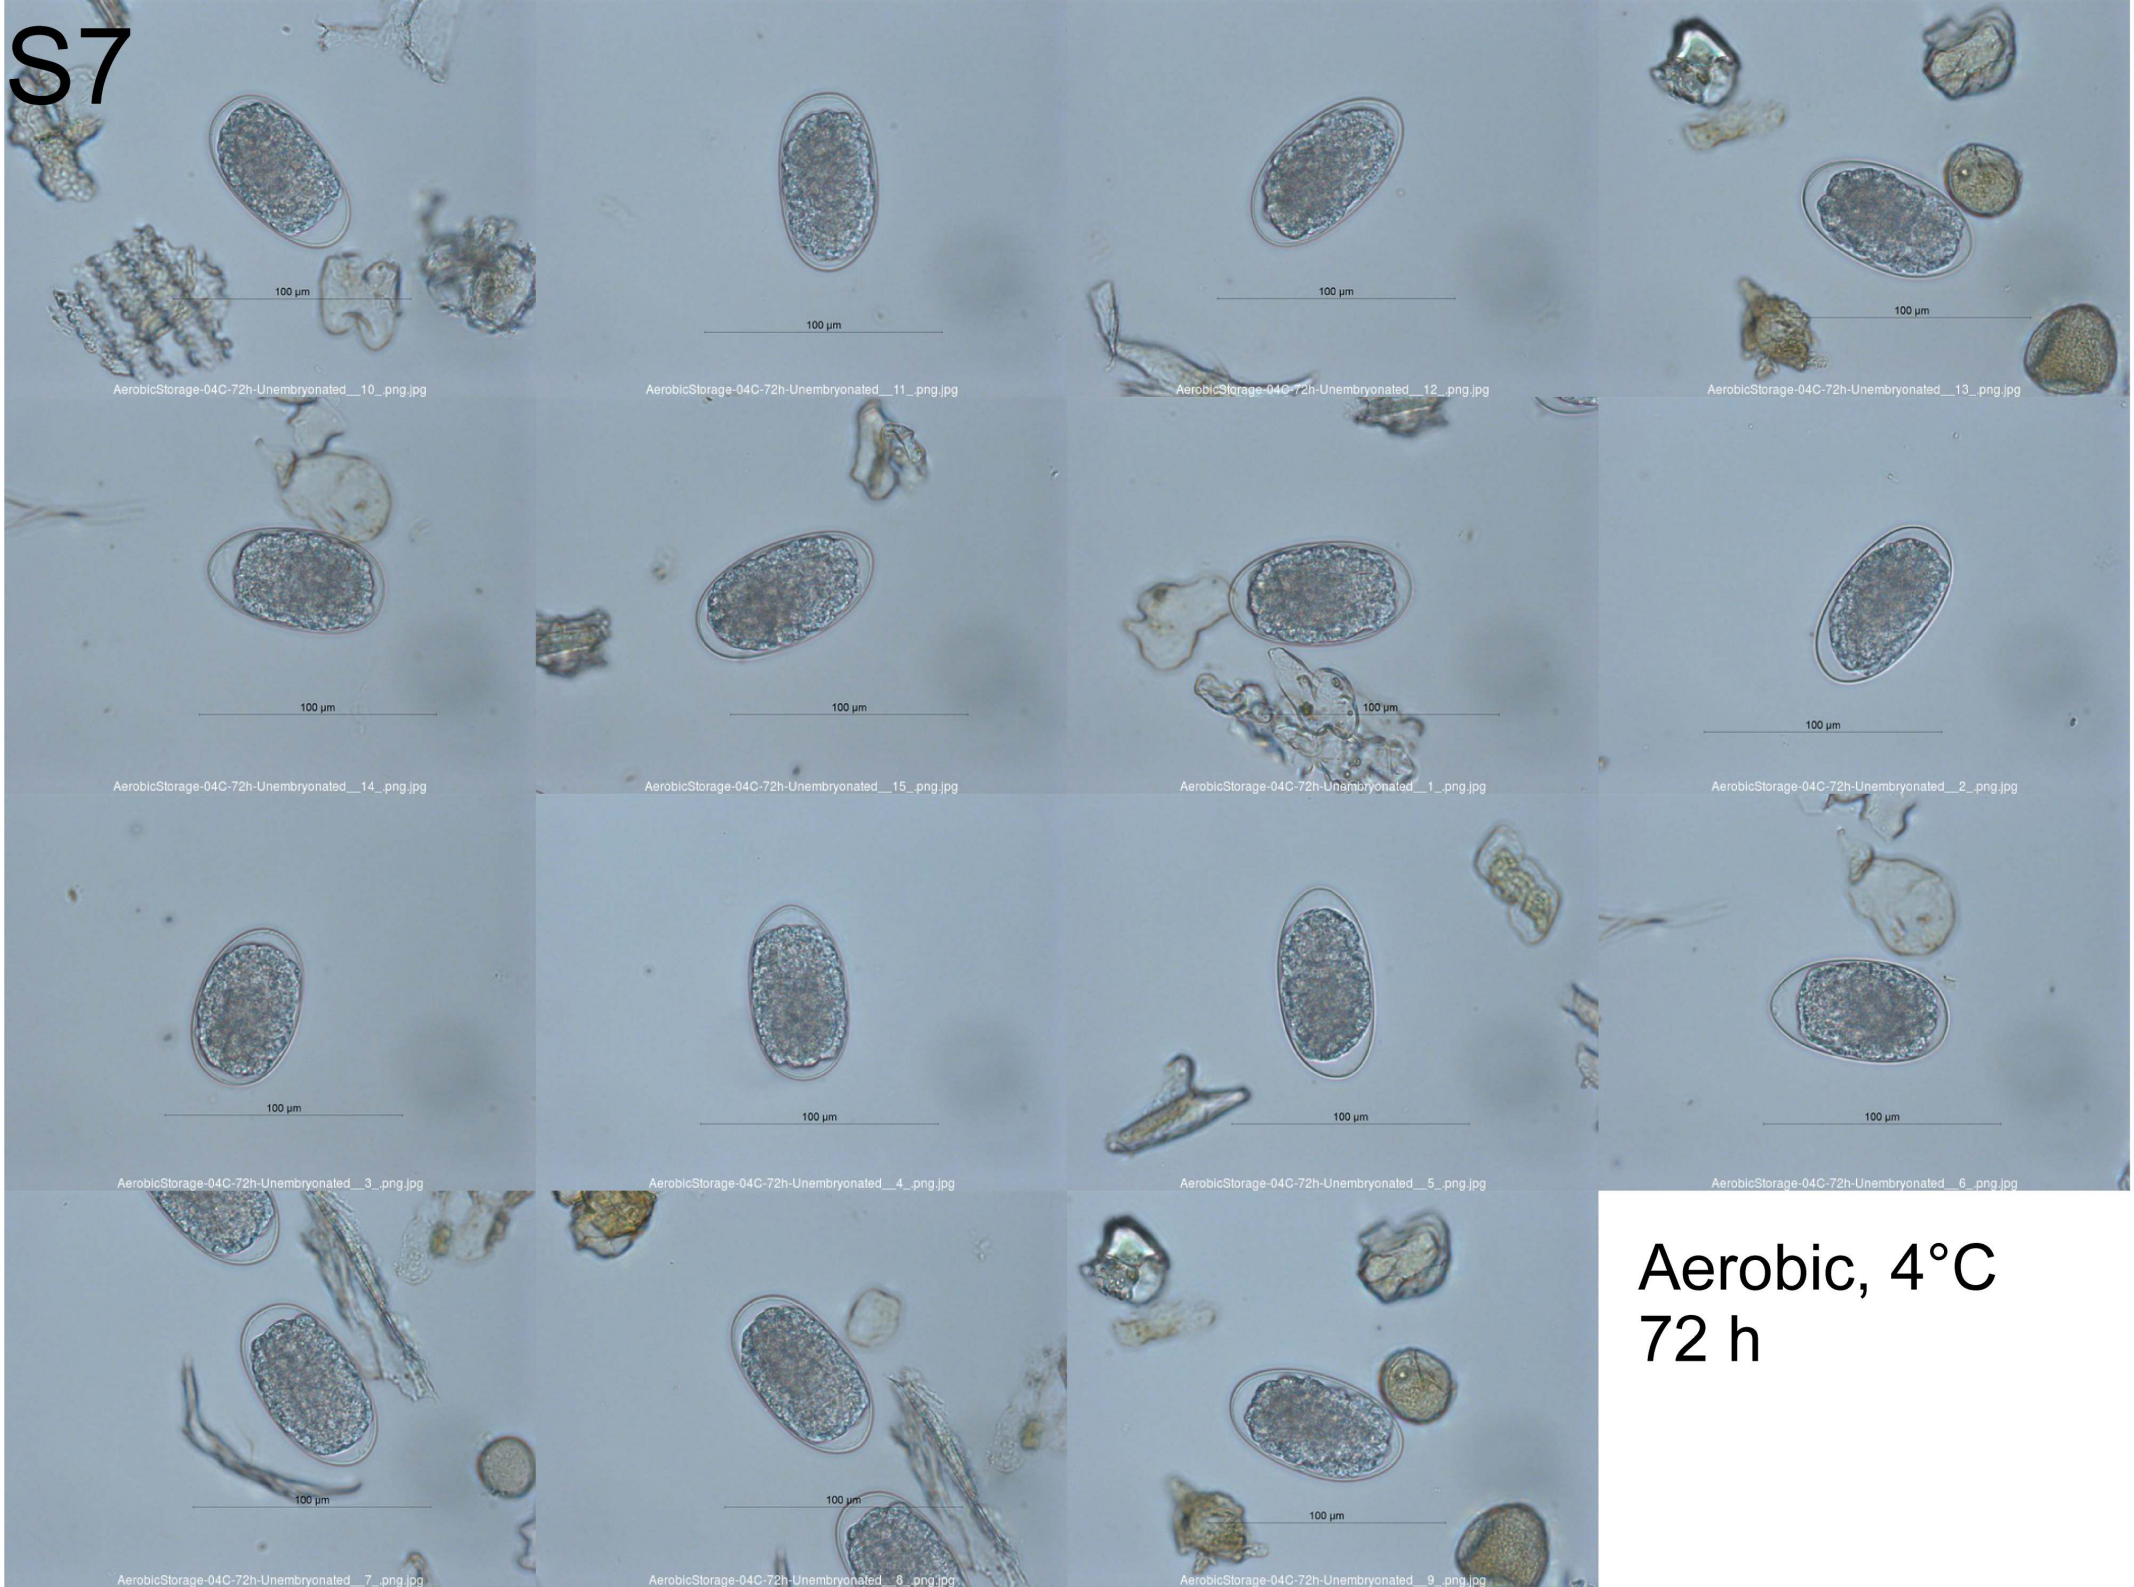

Aerobic, 4°C  
72 h



# S8

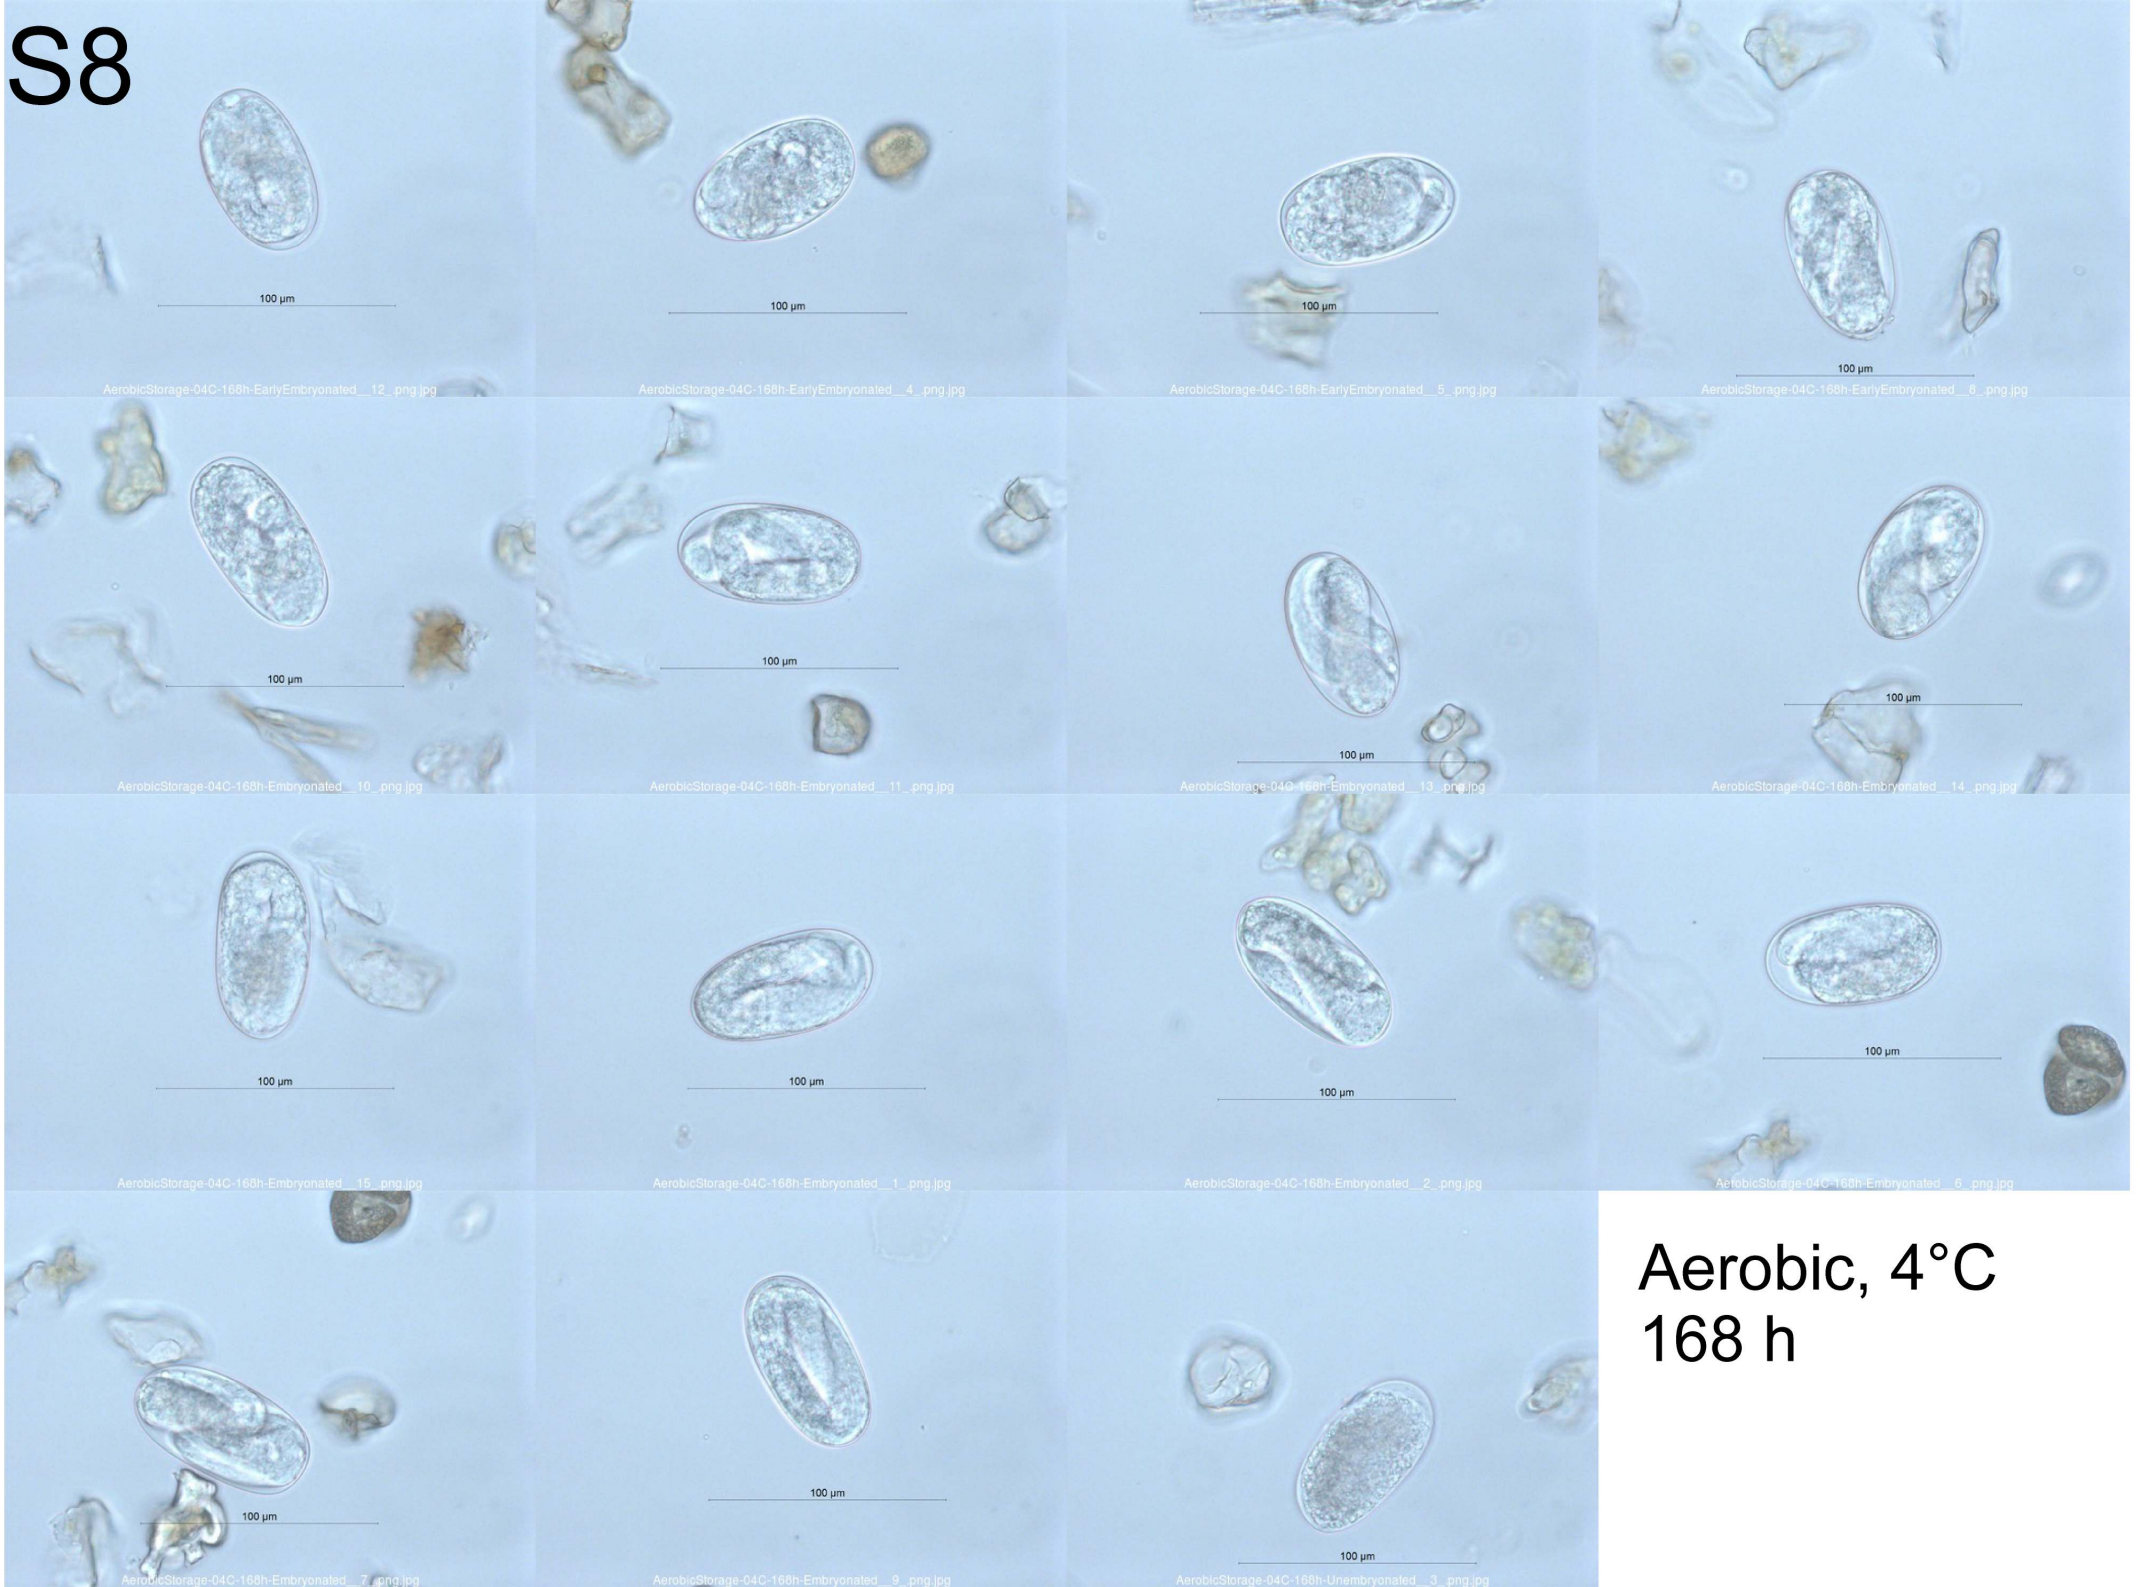

**Aerobic, 4°C  
168 h**



# S9

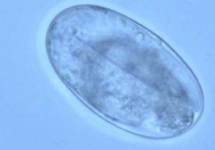

100  $\mu$ m

AerobicStorage-04C-336h-Embryonated\_\_10\_.png.jpg

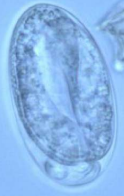

100  $\mu$ m

AerobicStorage-04C-336h-Embryonated\_\_11\_.png.jpg

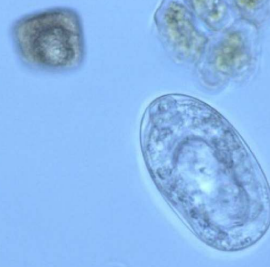

100  $\mu$ m

AerobicStorage-04C-336h-Embryonated\_\_12\_.png.jpg

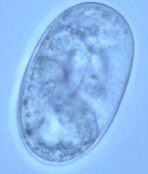

100  $\mu$ m

AerobicStorage-04C-336h-Embryonated\_\_13\_.png.jpg

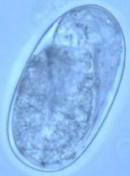

100  $\mu$ m

AerobicStorage-04C-336h-Embryonated\_\_14\_.png.jpg

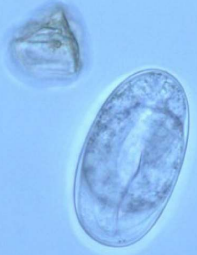

100  $\mu$ m

AerobicStorage-04C-336h-Embryonated\_\_15\_.png.jpg

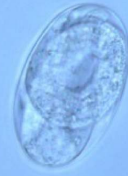

100  $\mu$ m

AerobicStorage-04C-336h-Embryonated\_\_1\_.png.jpg

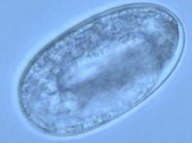

101  $\mu$ m

AerobicStorage-04C-336h-Embryonated\_\_2\_.png.jpg

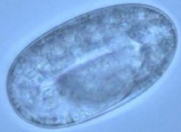

100  $\mu$ m

AerobicStorage-04C-336h-Embryonated\_\_3\_.png.jpg

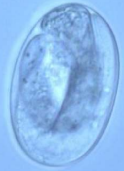

100  $\mu$ m

AerobicStorage-04C-336h-Embryonated\_\_4\_.png.jpg

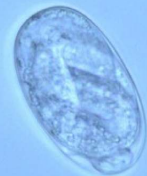

100  $\mu$ m

AerobicStorage-04C-336h-Embryonated\_\_5\_.png.jpg

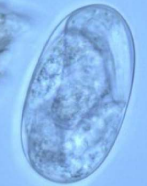

100  $\mu$ m

AerobicStorage-04C-336h-Embryonated\_\_6\_.png.jpg

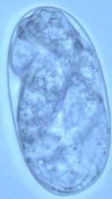

100  $\mu$ m

AerobicStorage-04C-336h-Embryonated\_\_7\_.png.jpg

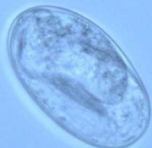

100  $\mu$ m

AerobicStorage-04C-336h-Embryonated\_\_8\_.png.jpg

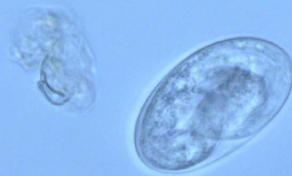

100  $\mu$ m

AerobicStorage-04C-336h-Embryonated\_\_9\_.png.jpg

Aerobic, 4°C  
336 h

# S10

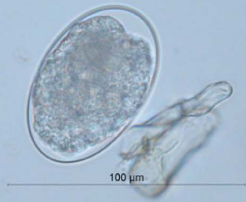

AerobicStorage-25C-0h-Unembryonated\_\_10\_.png.jpg

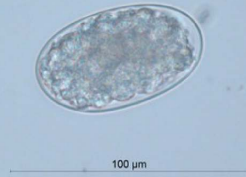

AerobicStorage-25C-0h-Unembryonated\_\_11\_.png.jpg

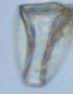

AerobicStorage-25C-0h-Unembryonated\_\_12\_.png.jpg

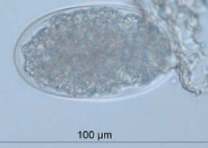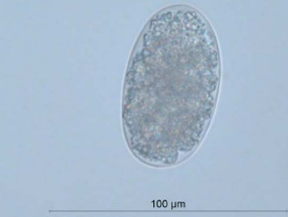

AerobicStorage-25C-0h-Unembryonated\_\_13\_.png.jpg

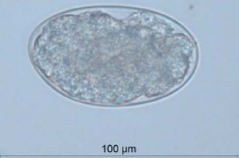

AerobicStorage-25C-0h-Unembryonated\_\_14\_.png.jpg

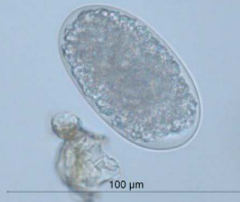

AerobicStorage-25C-0h-Unembryonated\_\_15\_.png.jpg

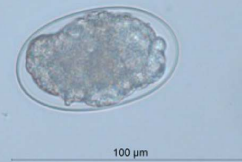

AerobicStorage-25C-0h-Unembryonated\_\_1\_.png.jpg

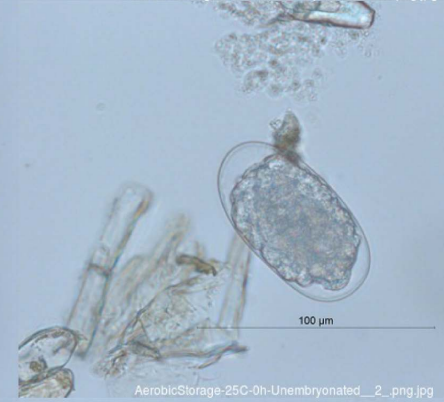

AerobicStorage-25C-0h-Unembryonated\_\_2\_.png.jpg

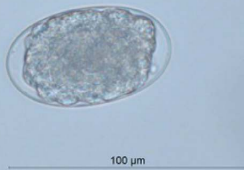

AerobicStorage-25C-0h-Unembryonated\_\_3\_.png.jpg

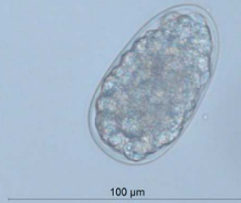

AerobicStorage-25C-0h-Unembryonated\_\_4\_.png.jpg

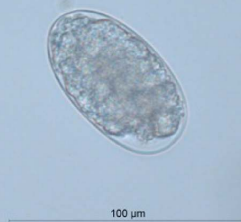

AerobicStorage-25C-0h-Unembryonated\_\_5\_.png.jpg

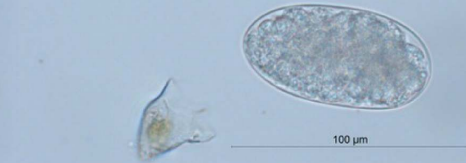

AerobicStorage-25C-0h-Unembryonated\_\_6\_.png.jpg

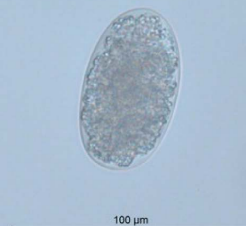

AerobicStorage-25C-0h-Unembryonated\_\_7\_.png.jpg

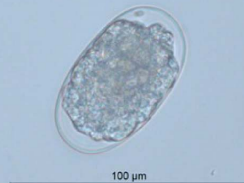

AerobicStorage-25C-0h-Unembryonated\_\_8\_.png.jpg

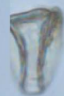

AerobicStorage-25C-0h-Unembryonated\_\_9\_.png.jpg

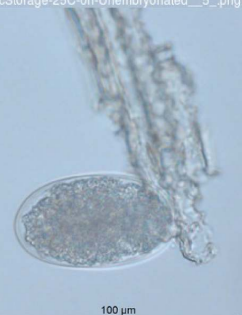

Aerobic, 25°C  
0 h



# S11

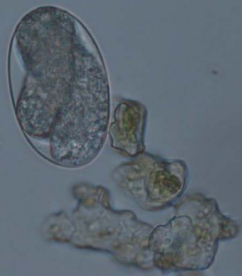

AerobicStorage-25C-12h-EarlyEmbryonated\_\_14\_.png.jpg

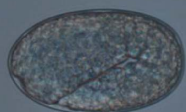

AerobicStorage-25C-12h-EarlyEmbryonated\_\_2\_.png.jpg

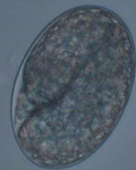

AerobicStorage-25C-12h-EarlyEmbryonated\_\_3\_.png.jpg

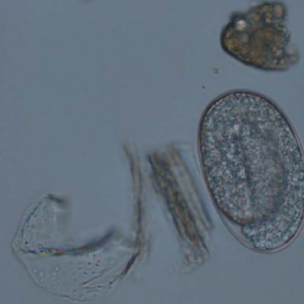

AerobicStorage-25C-12h-EarlyEmbryonated\_\_5\_.png.jpg

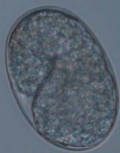

AerobicStorage-25C-12h-EarlyEmbryonated\_\_6\_.png.jpg

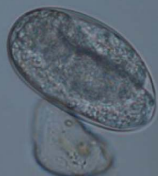

AerobicStorage-25C-12h-EarlyEmbryonated\_\_7\_.png.jpg

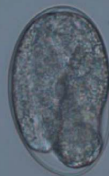

AerobicStorage-25C-12h-EarlyEmbryonated\_\_8\_.png.jpg

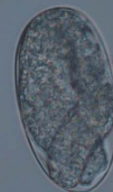

AerobicStorage-25C-12h-EarlyEmbryonated\_\_9\_.png.jpg

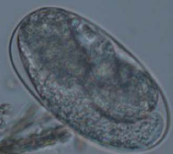

AerobicStorage-25C-12h-Embryonated\_\_10\_.png.jpg

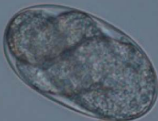

AerobicStorage-25C-12h-Embryonated\_\_12\_.png.jpg

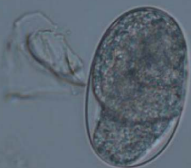

AerobicStorage-25C-12h-Embryonated\_\_13\_.png.jpg

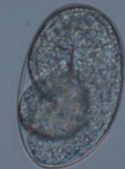

AerobicStorage-25C-12h-Embryonated\_\_15\_.png.jpg

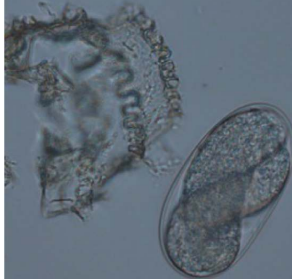

AerobicStorage-25C-12h-Embryonated\_\_1\_.png.jpg

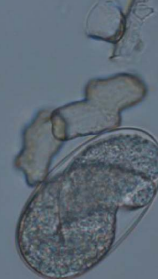

AerobicStorage-25C-12h-Embryonated\_\_4\_.png.jpg

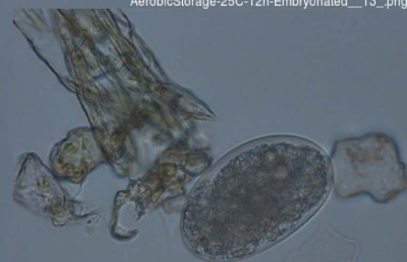

AerobicStorage-25C-12h-Unembryonated\_\_11\_.png.jpg

Aerobic, 25°C  
12 h

# S12

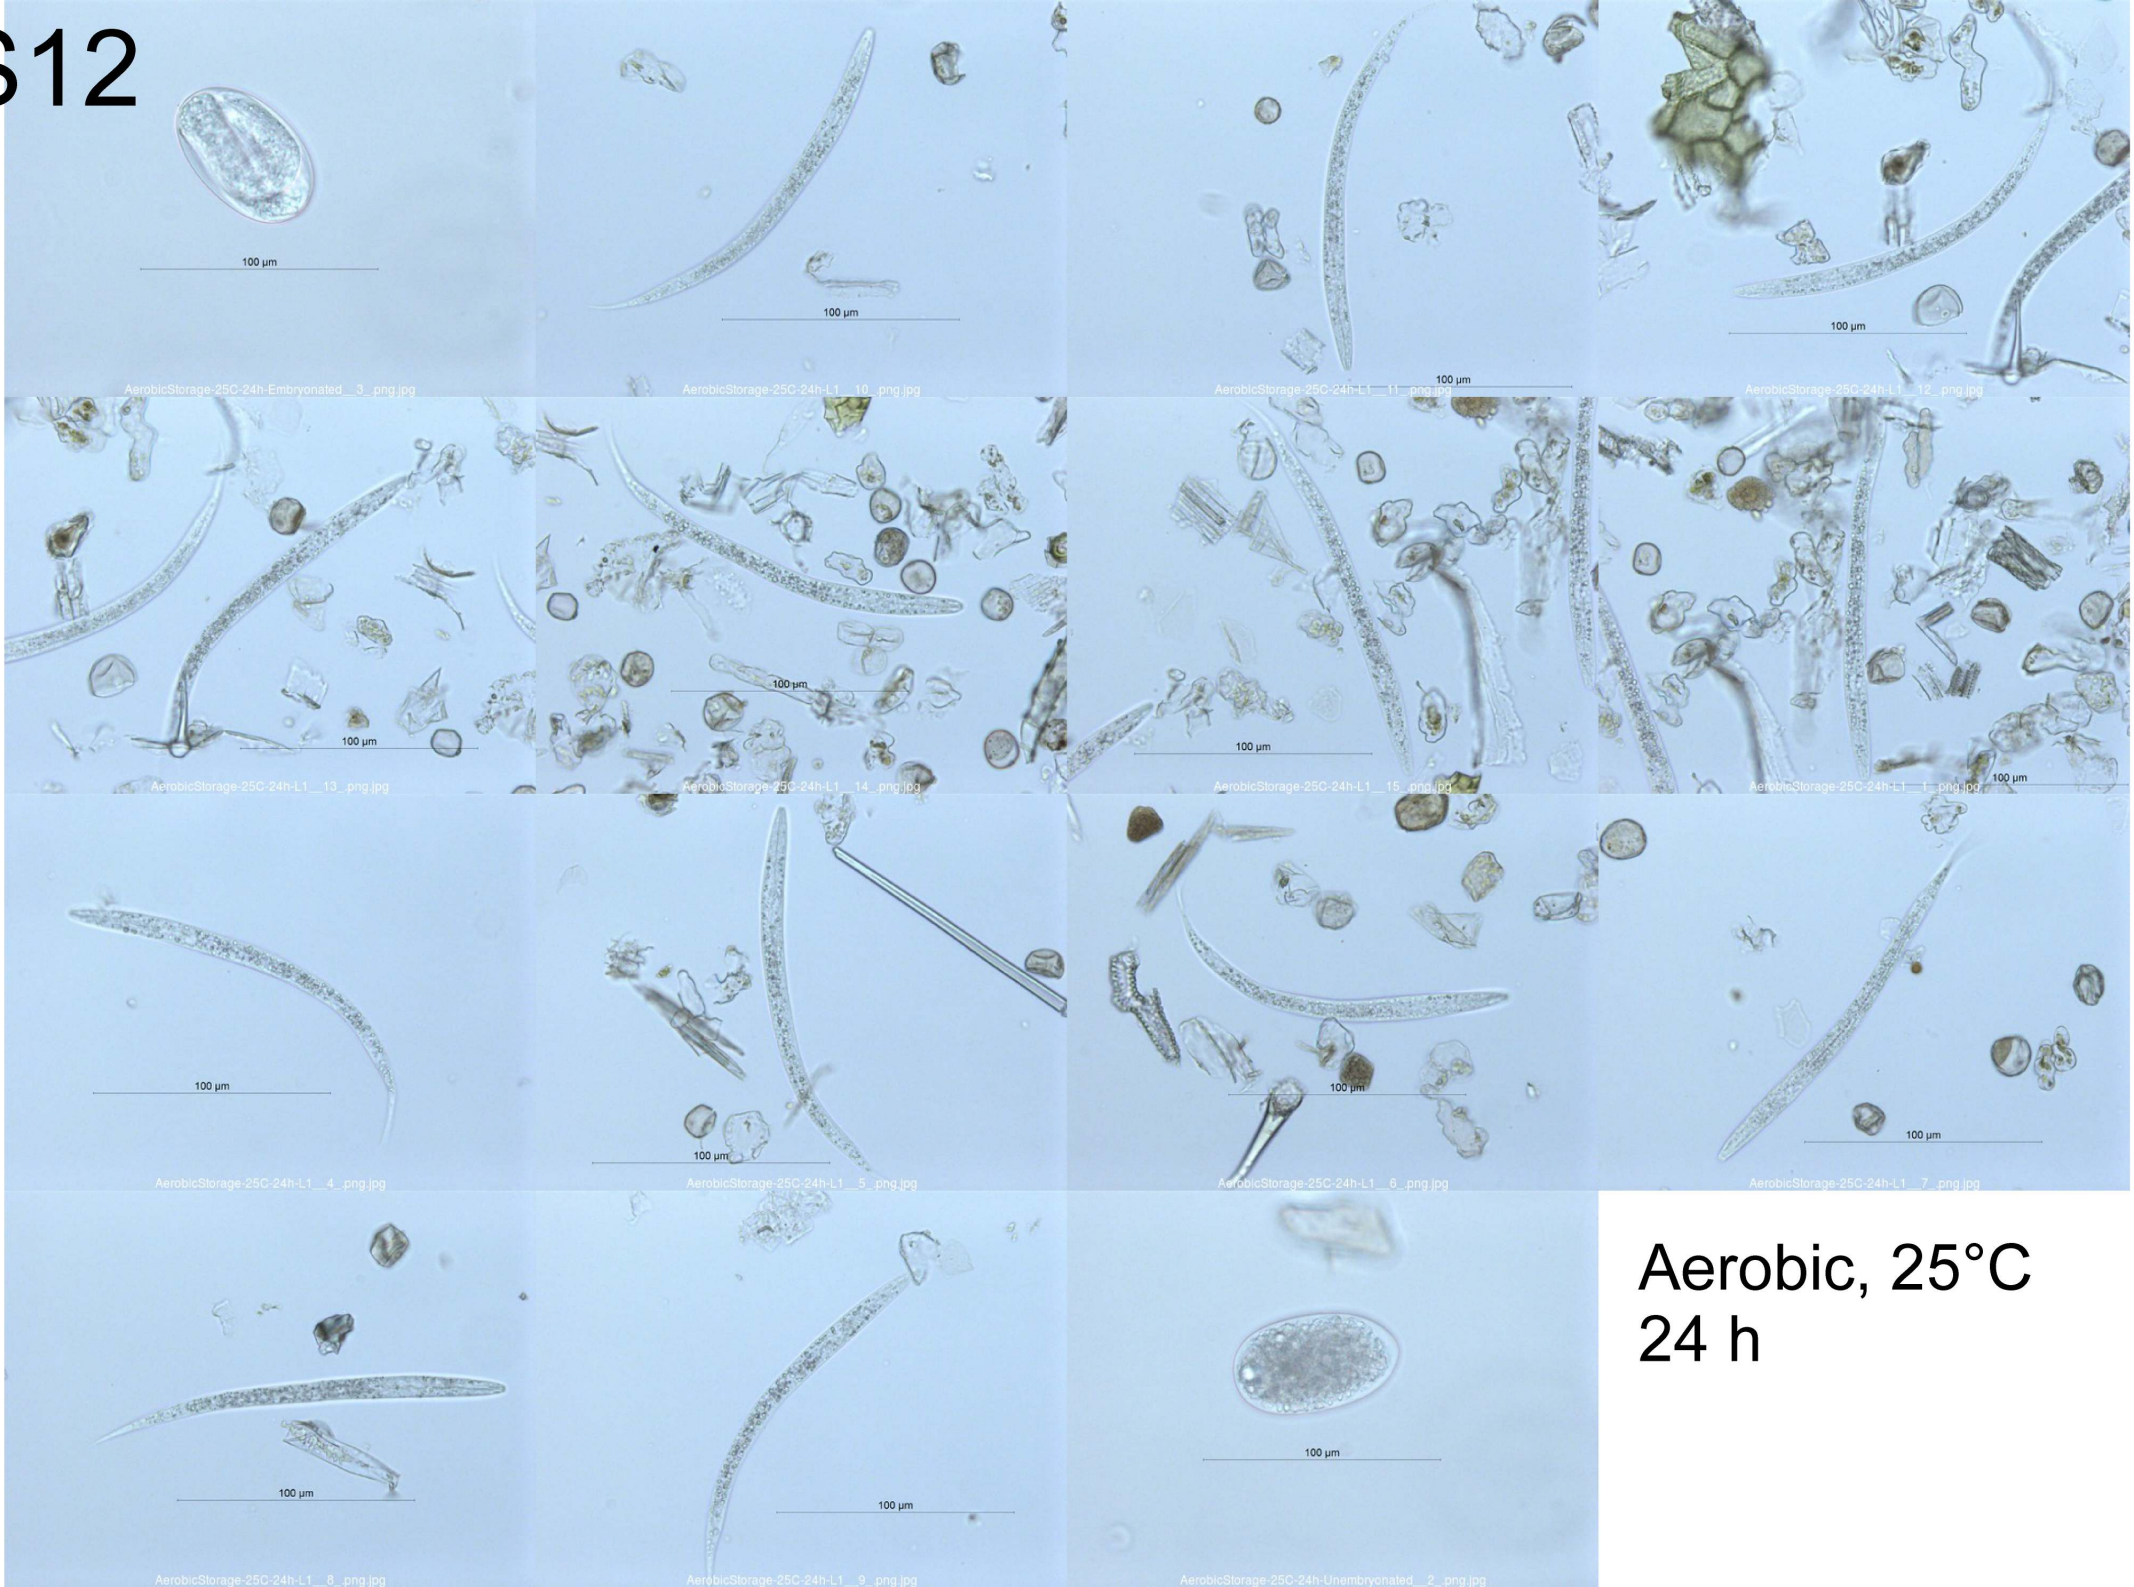

**Aerobic, 25°C  
24 h**



# S13

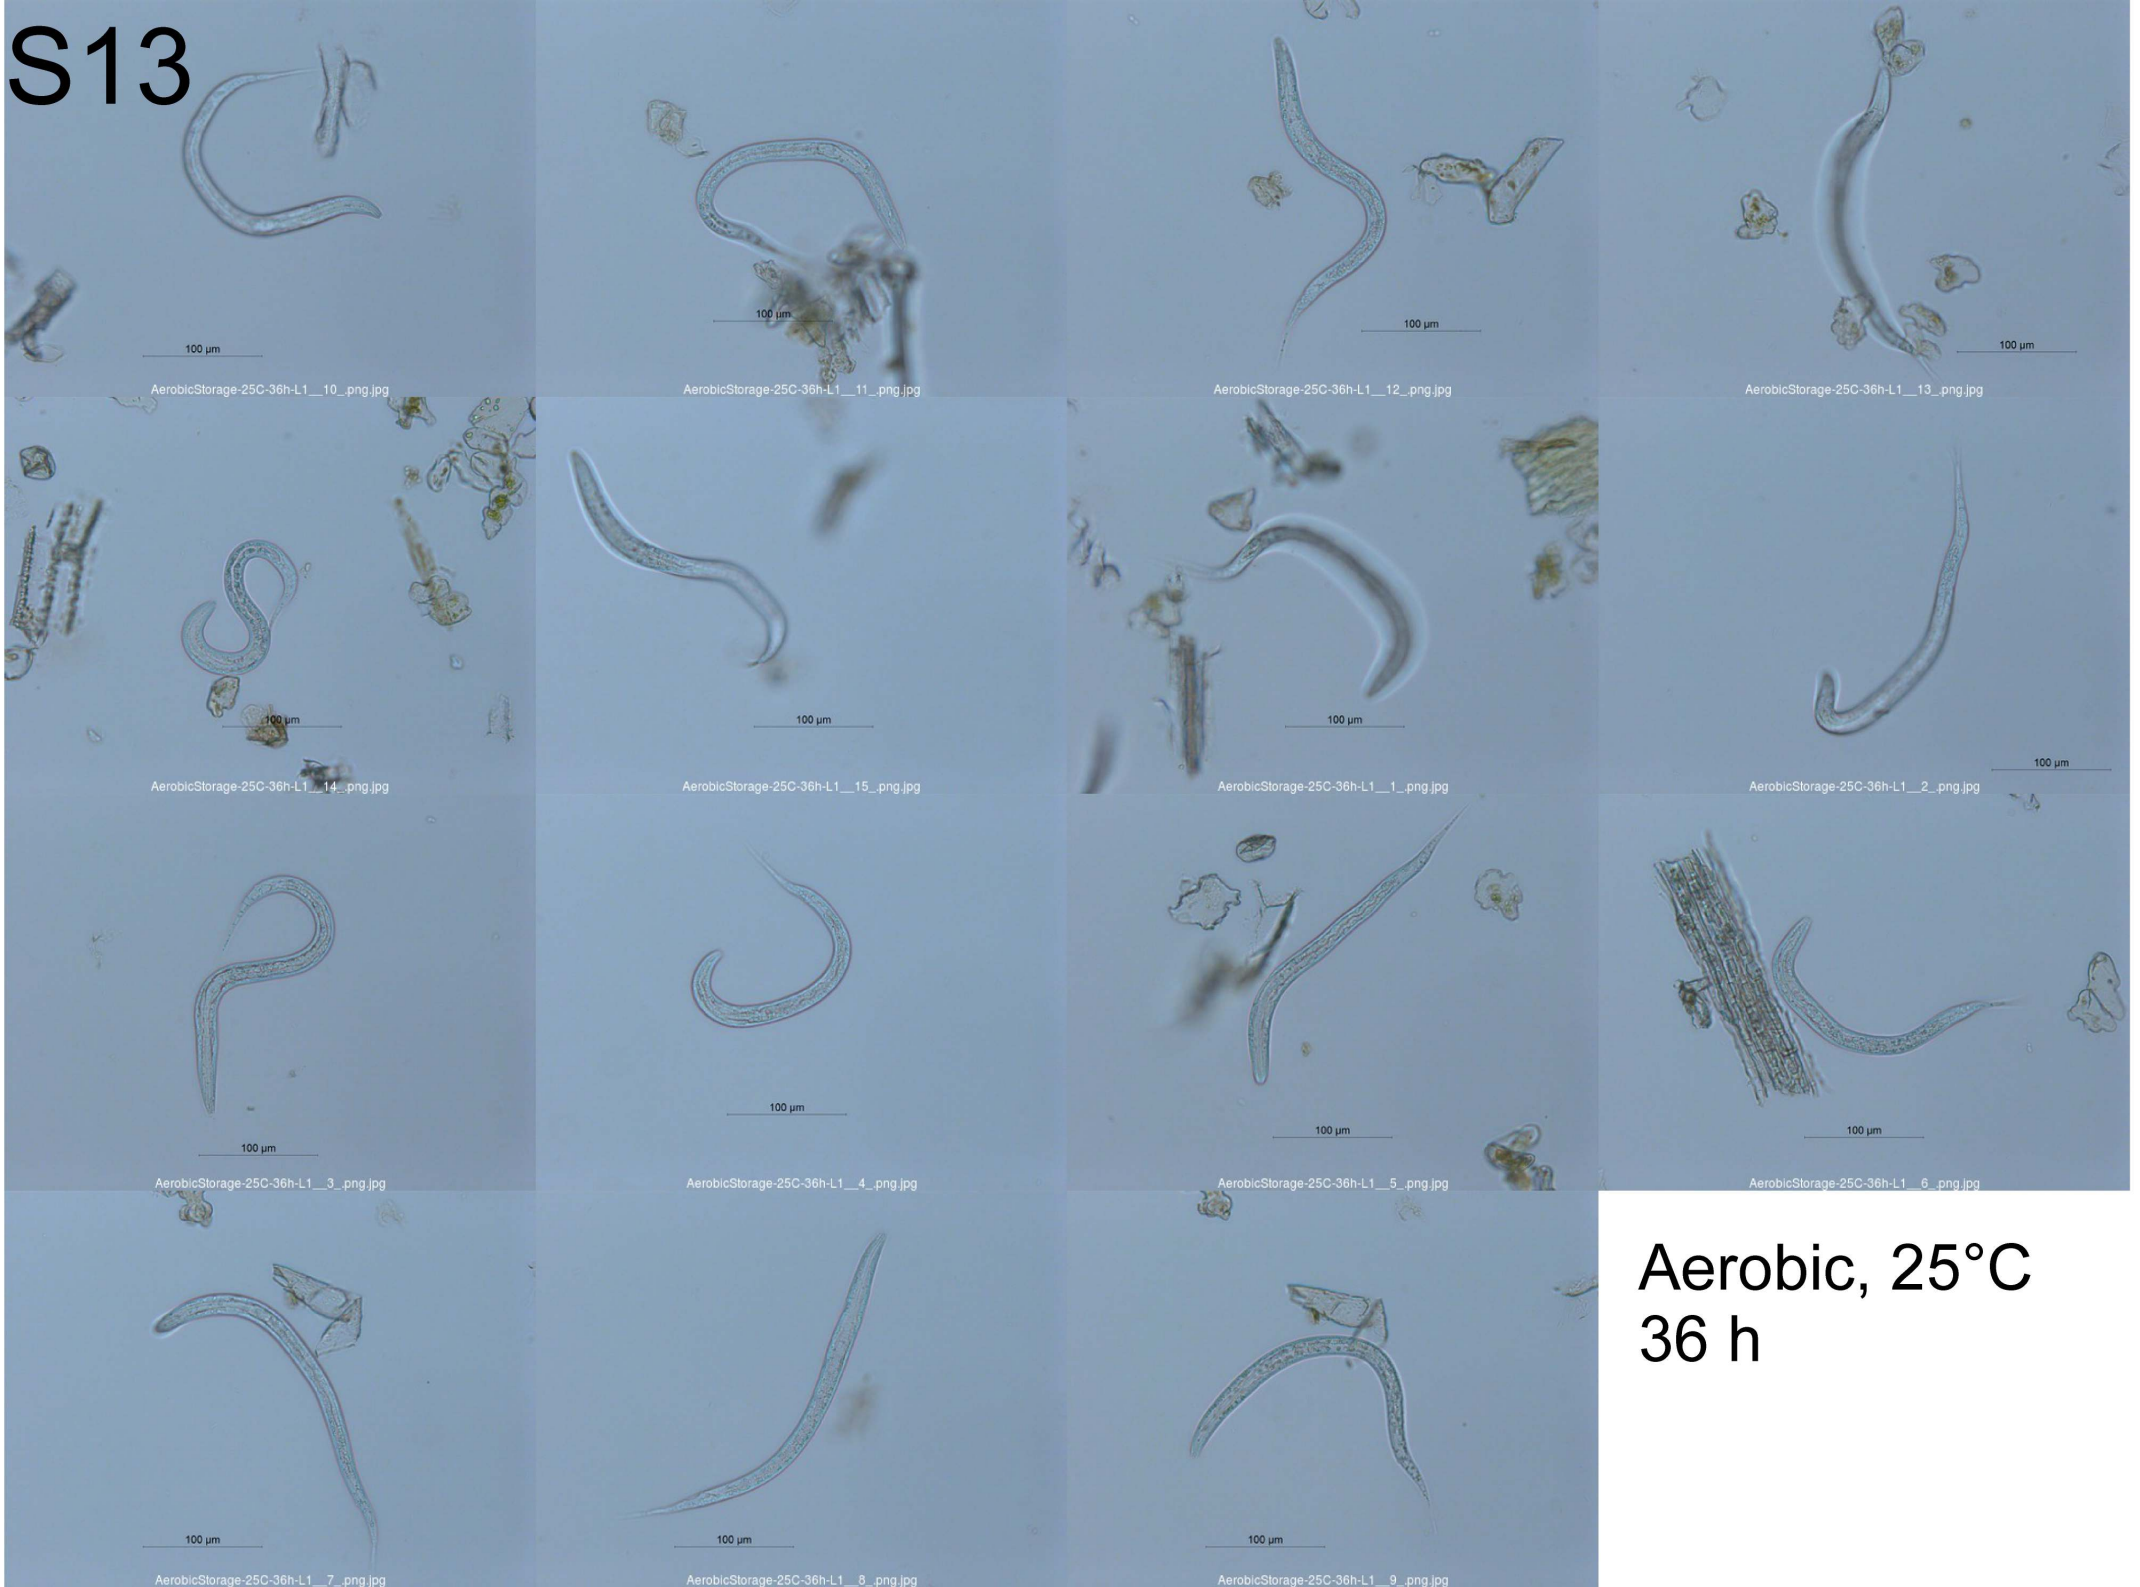

**Aerobic, 25°C  
36 h**

# S14

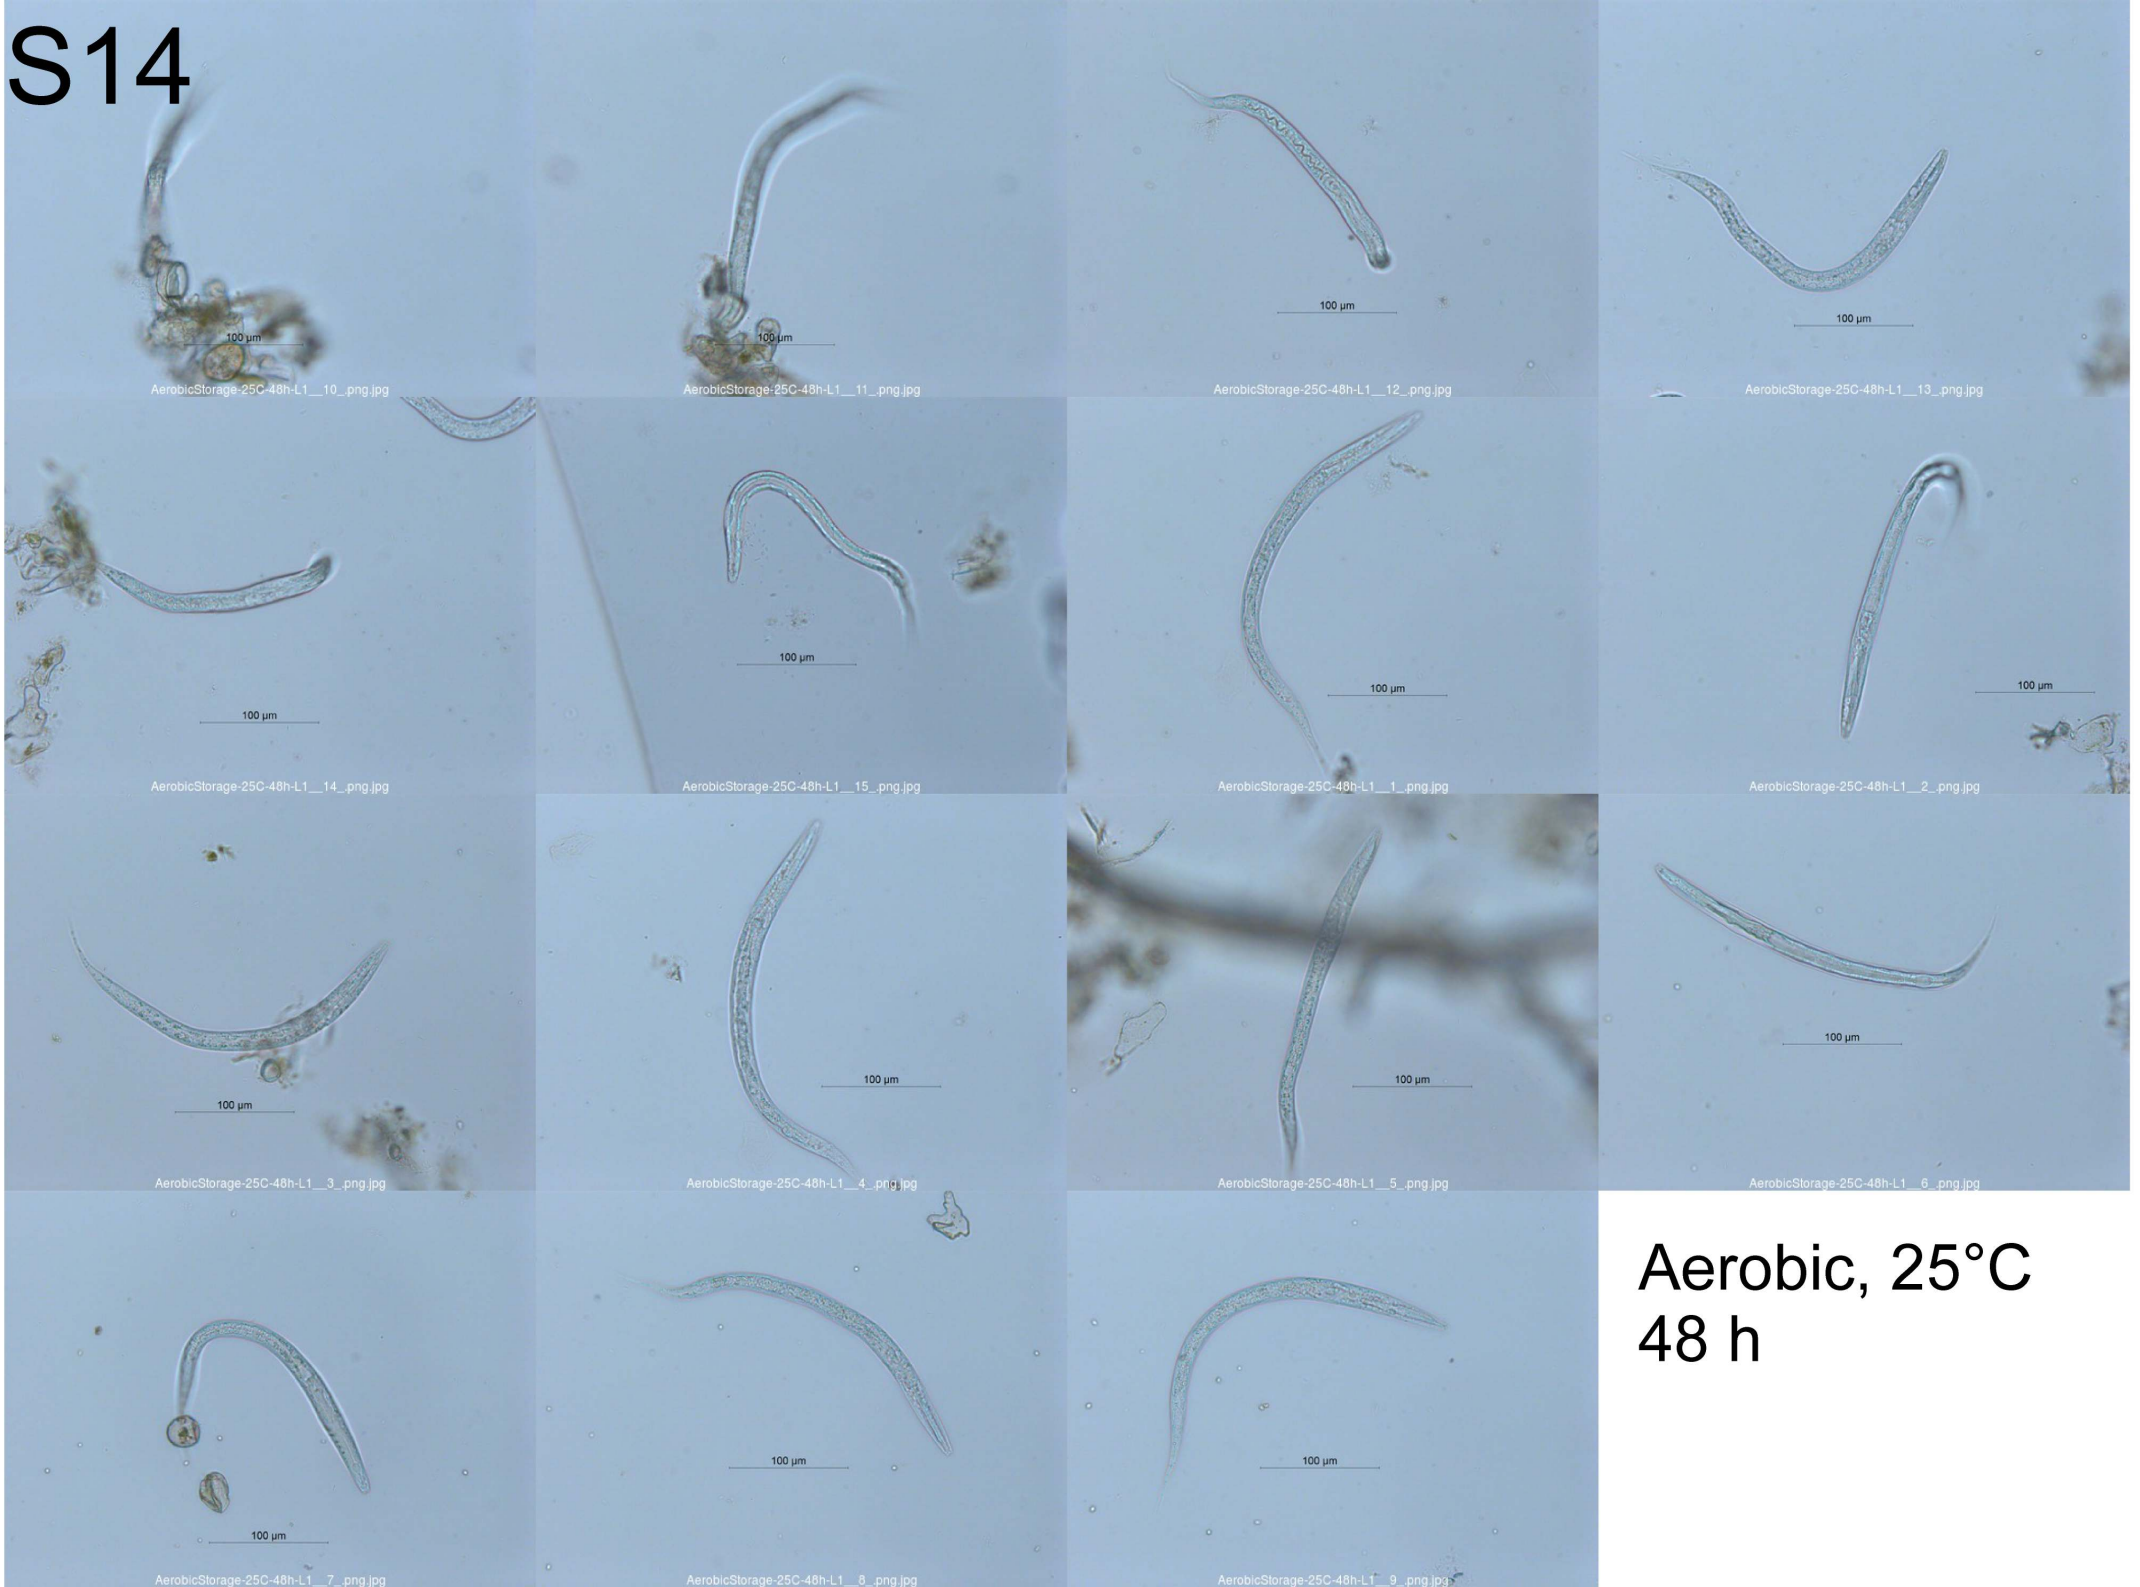

Aerobic, 25°C  
48 h



# S15

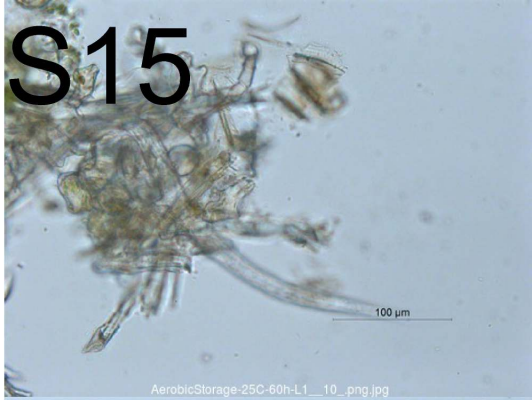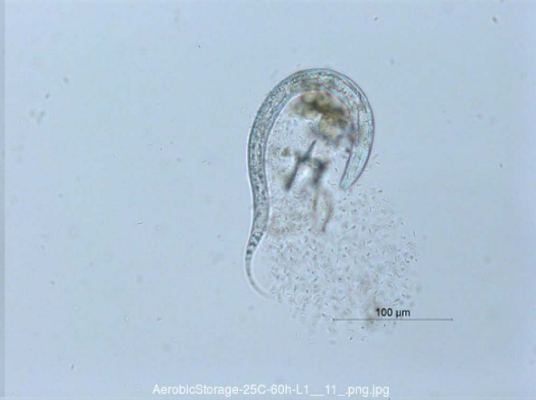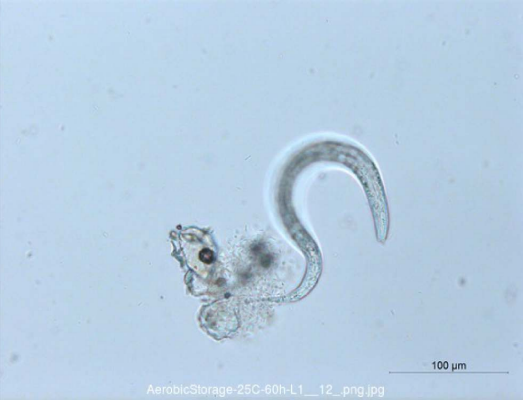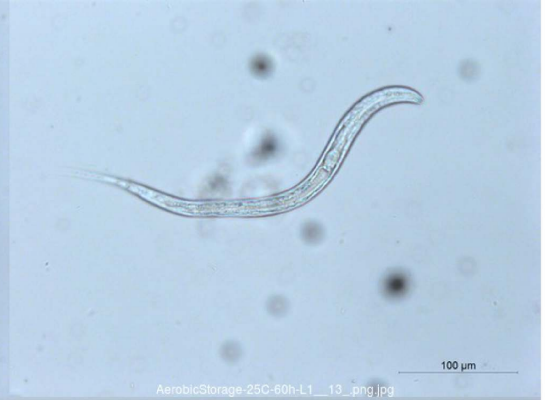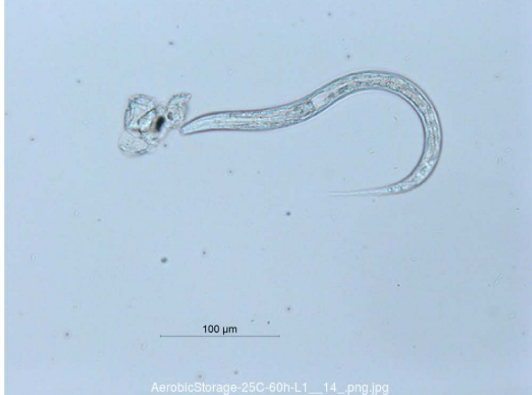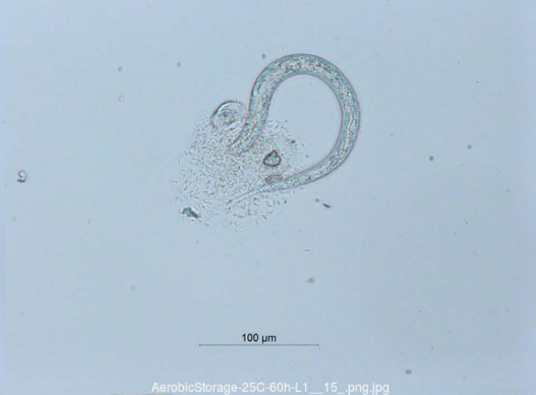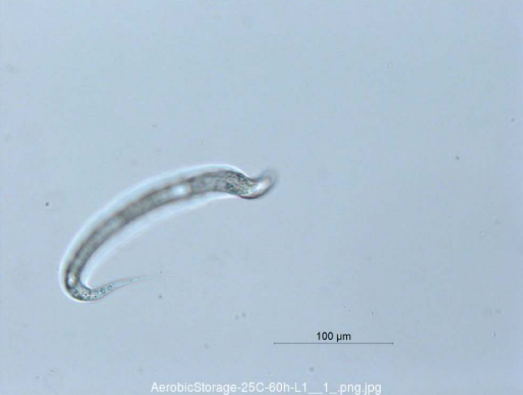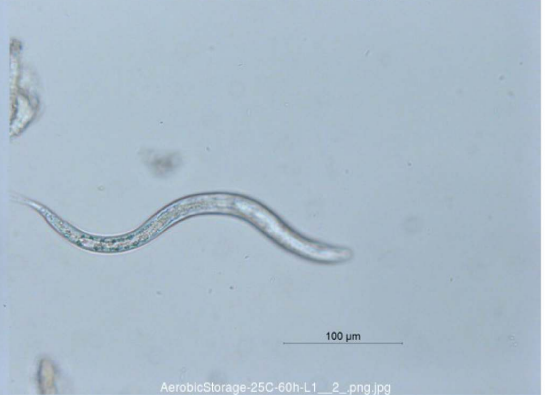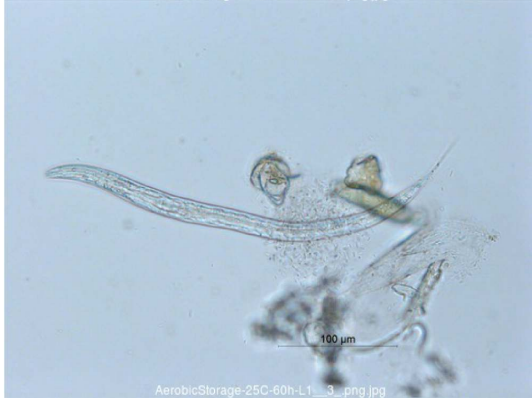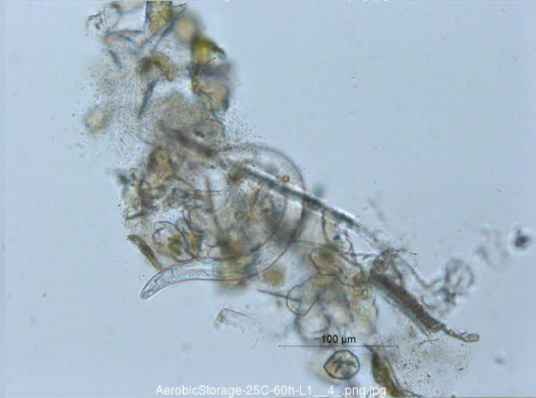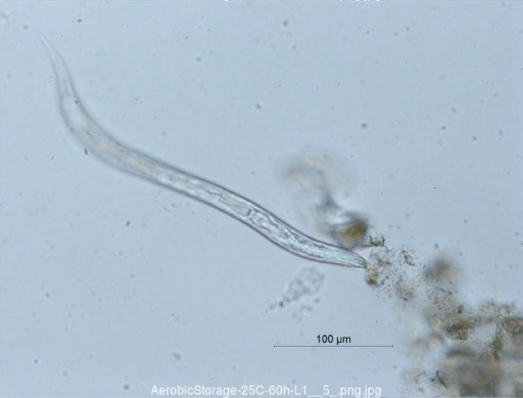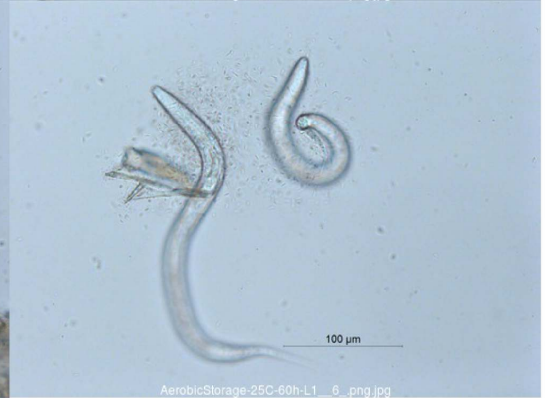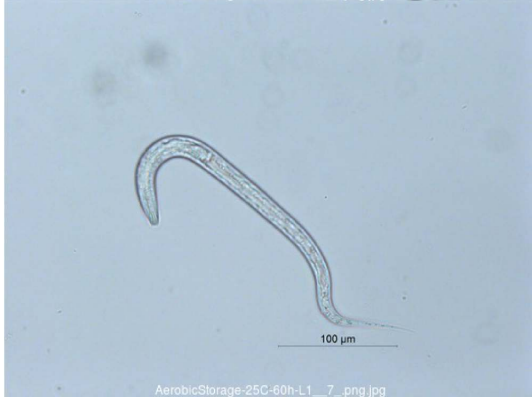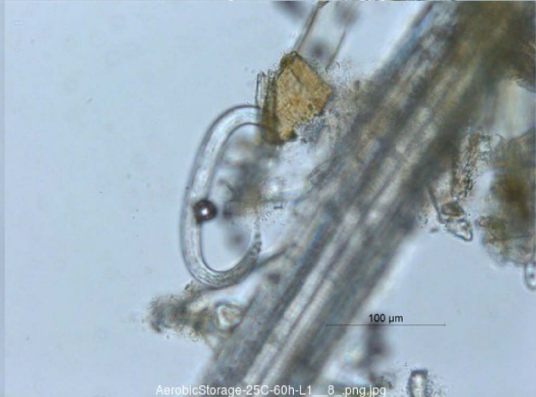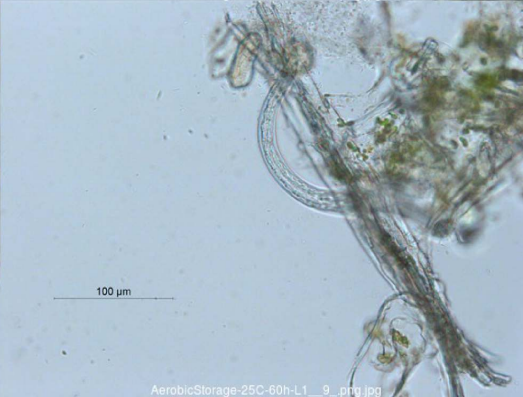

Aerobic, 25°C  
60 h



# S16

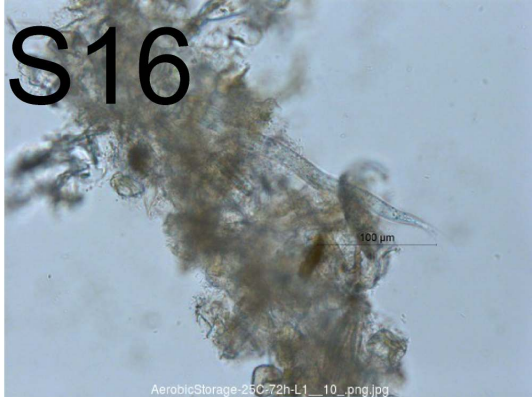

AerobicStorage-25C-72h-L1\_10\_.png.jpg

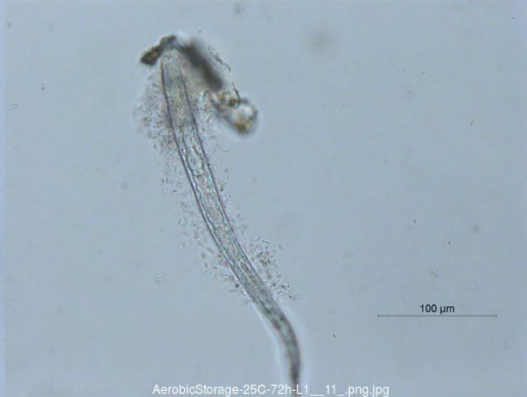

AerobicStorage-25C-72h-L1\_11\_.png.jpg

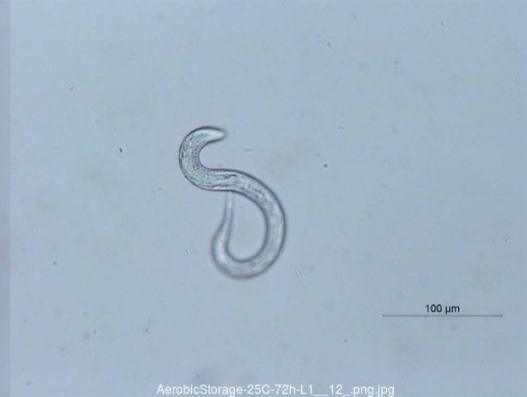

AerobicStorage-25C-72h-L1\_12\_.png.jpg

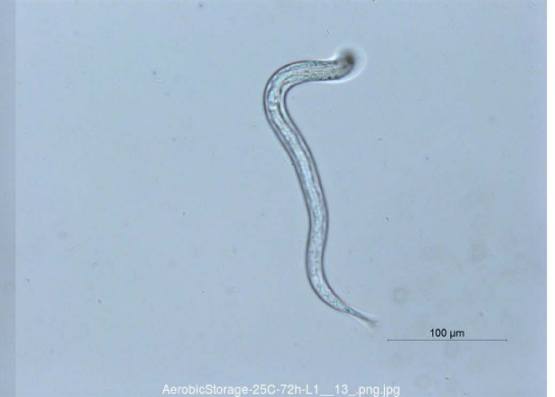

AerobicStorage-25C-72h-L1\_13\_.png.jpg

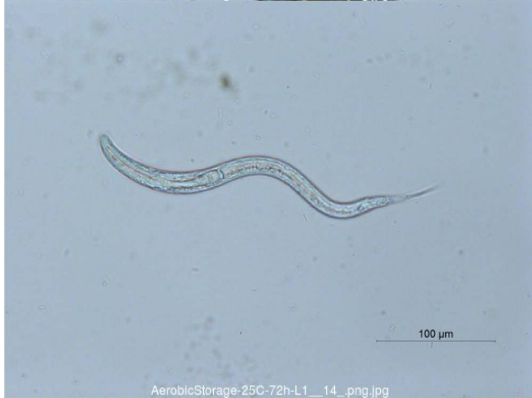

AerobicStorage-25C-72h-L1\_14\_.png.jpg

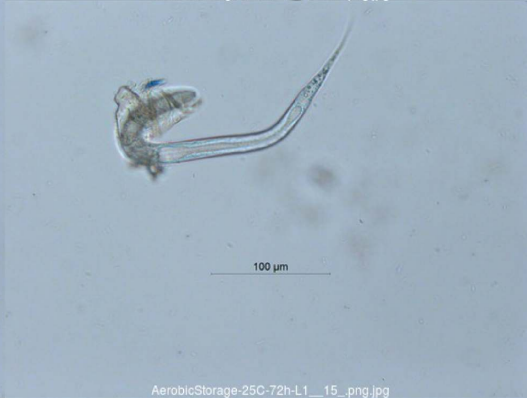

AerobicStorage-25C-72h-L1\_15\_.png.jpg

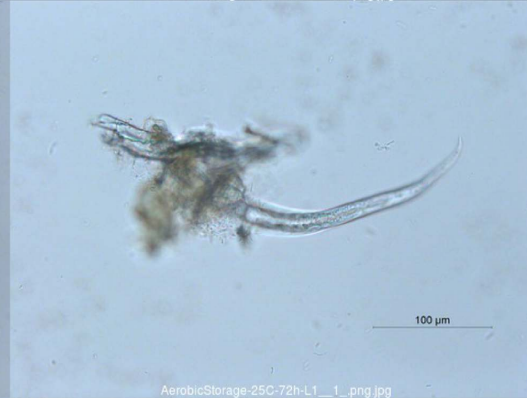

AerobicStorage-25C-72h-L1\_1\_.png.jpg

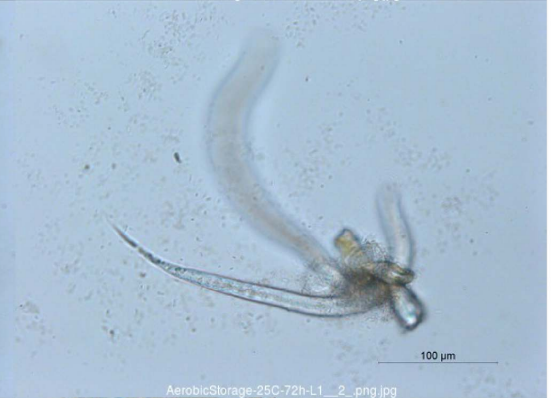

AerobicStorage-25C-72h-L1\_2\_.png.jpg

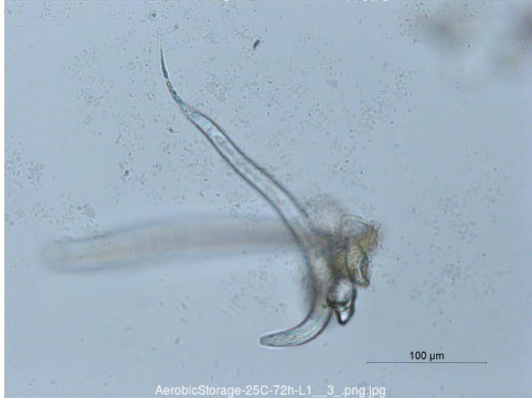

AerobicStorage-25C-72h-L1\_3\_.png.jpg

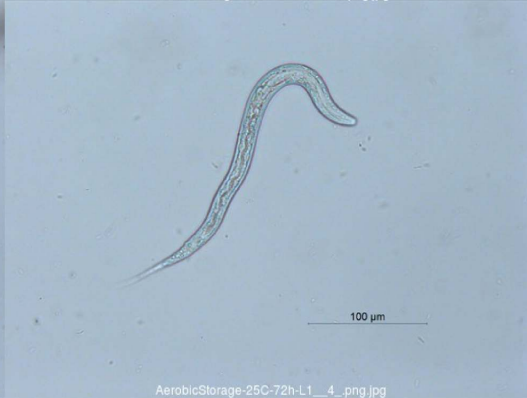

AerobicStorage-25C-72h-L1\_4\_.png.jpg

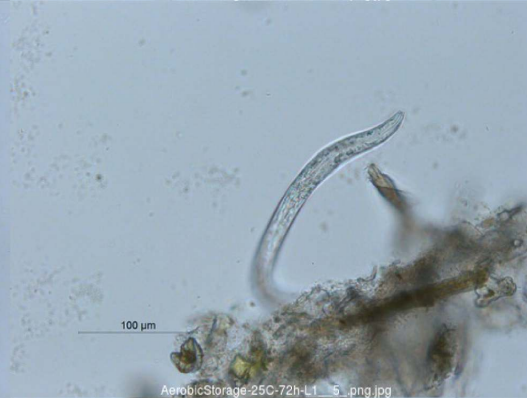

AerobicStorage-25C-72h-L1\_5\_.png.jpg

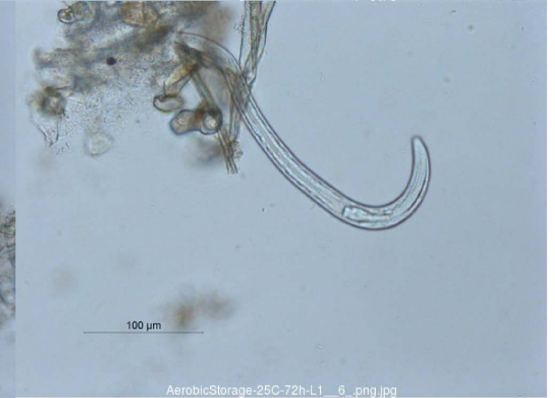

AerobicStorage-25C-72h-L1\_6\_.png.jpg

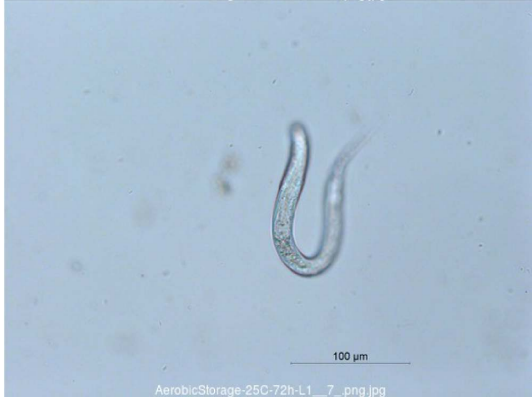

AerobicStorage-25C-72h-L1\_7\_.png.jpg

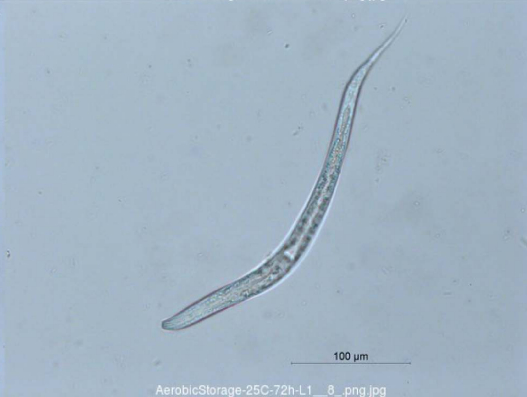

AerobicStorage-25C-72h-L1\_8\_.png.jpg

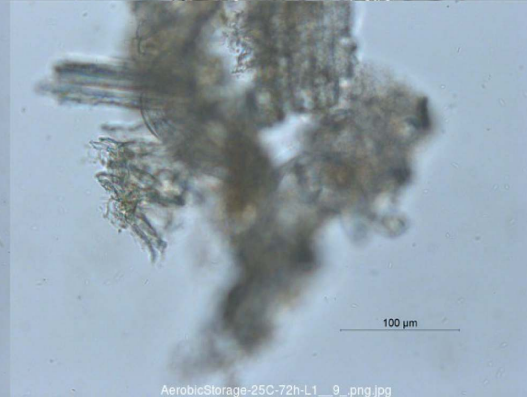

AerobicStorage-25C-72h-L1\_9\_.png.jpg

Aerobic, 25°C  
72 h



# S17

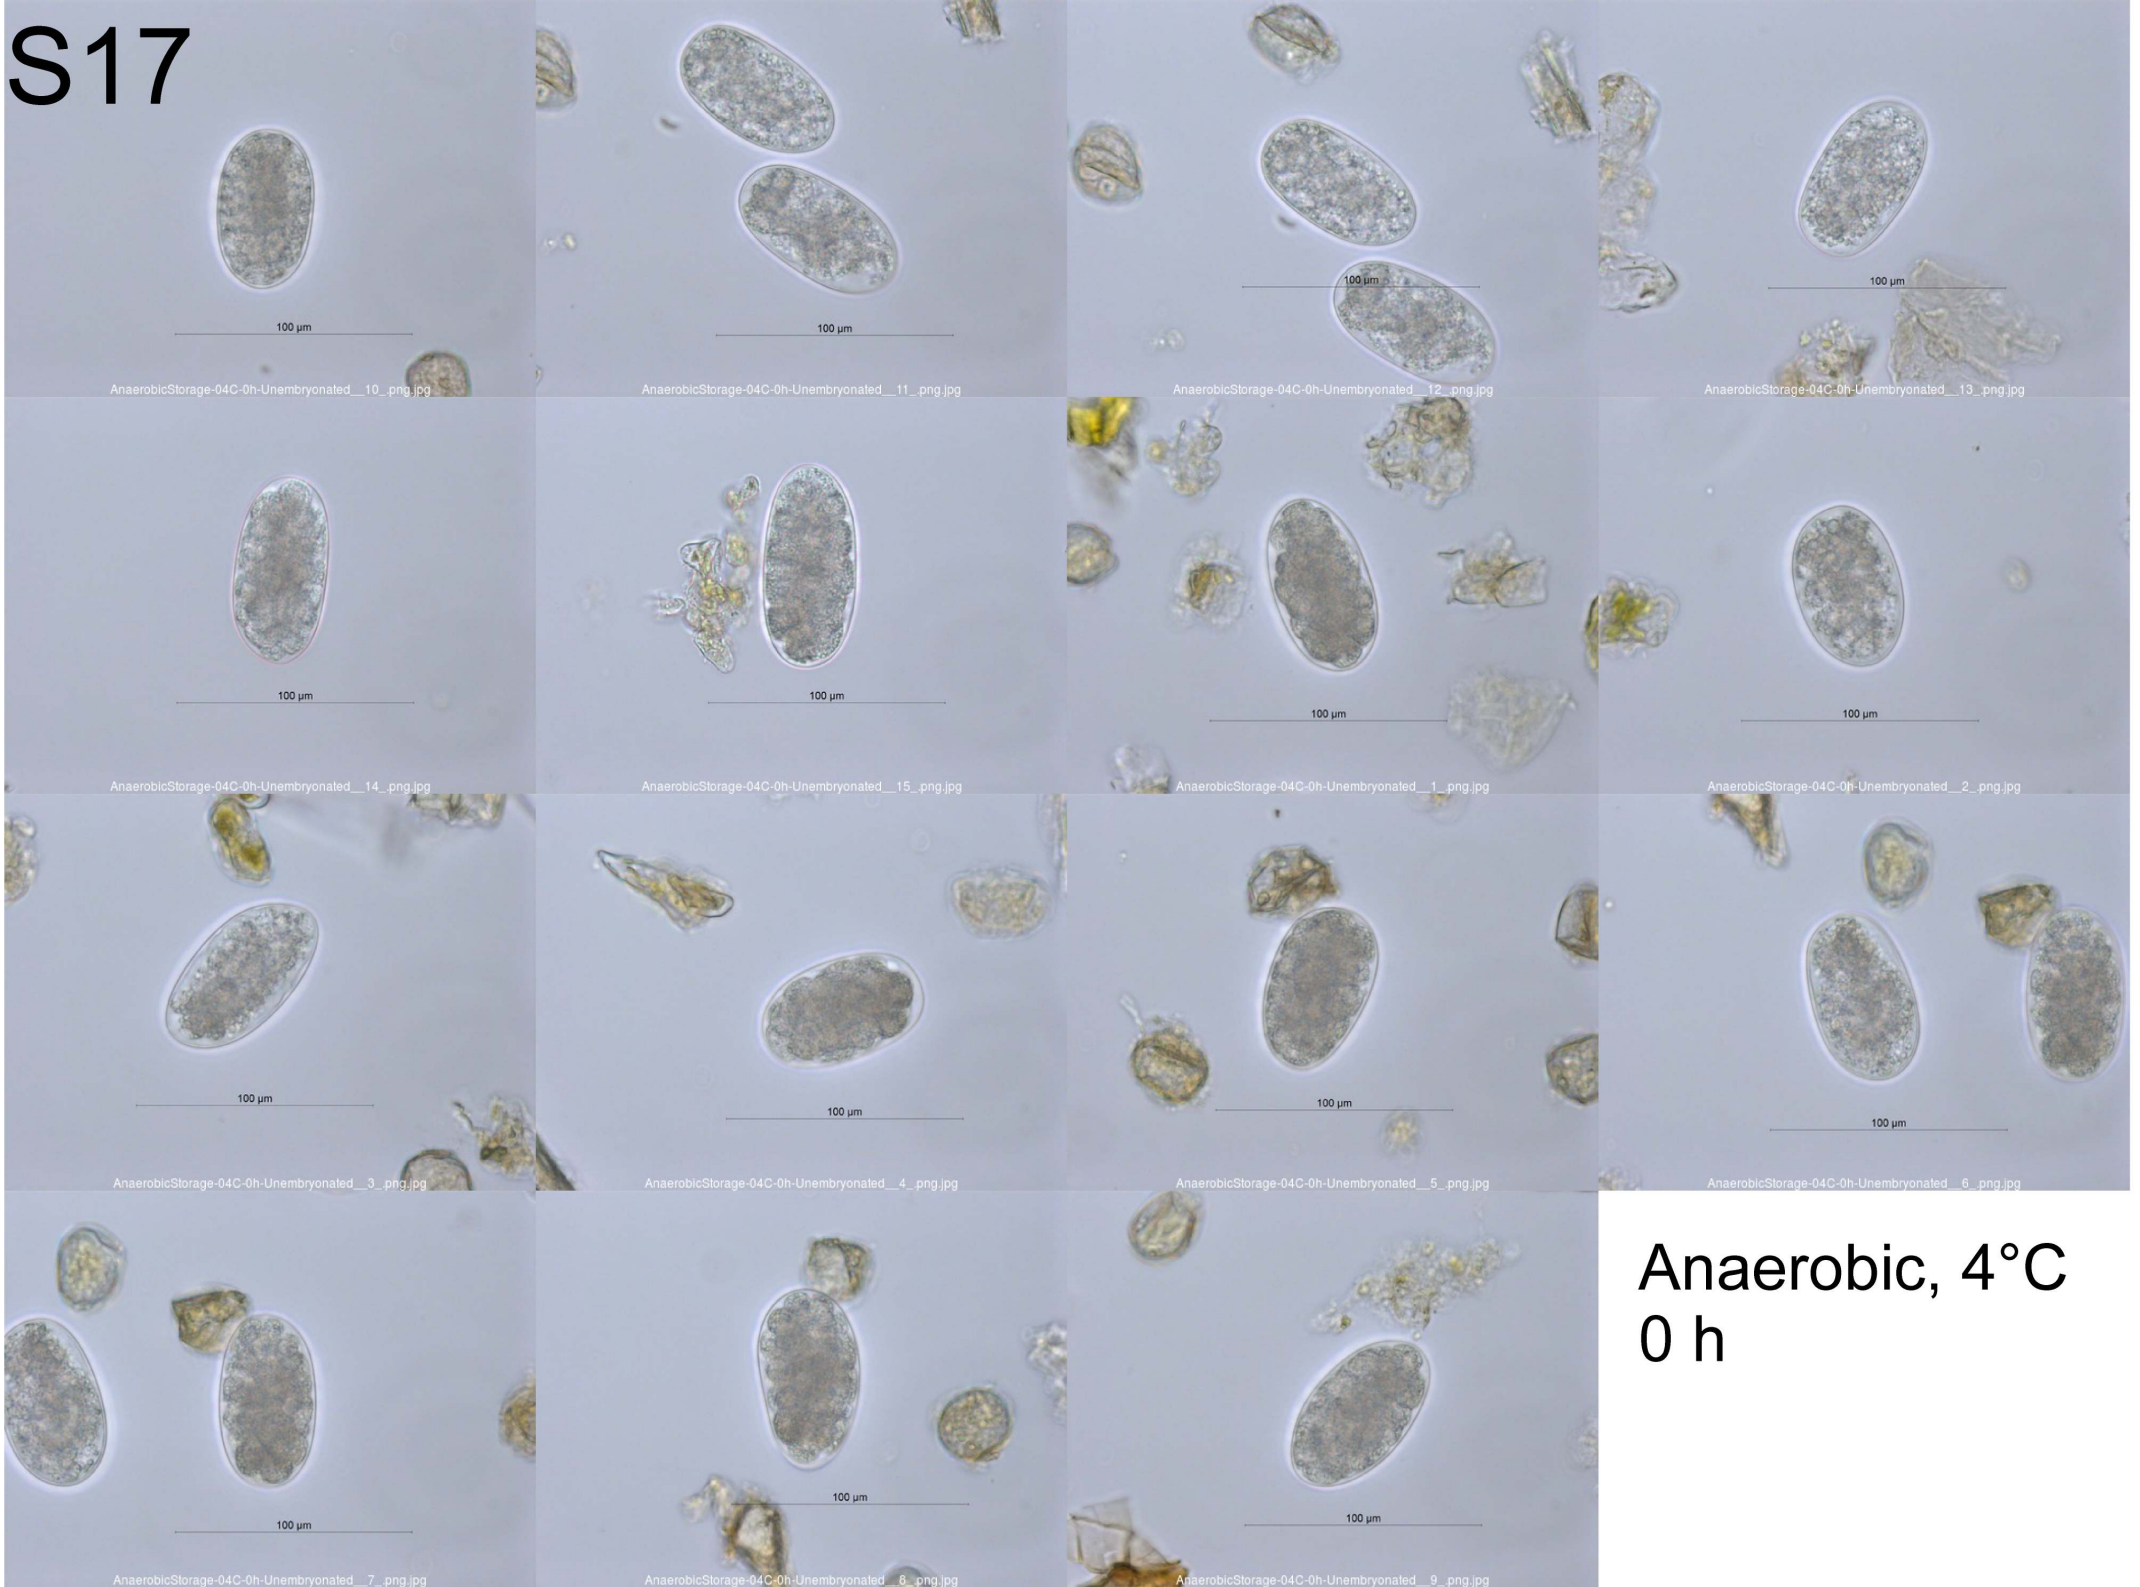

Anaerobic, 4°C  
0 h

# S18

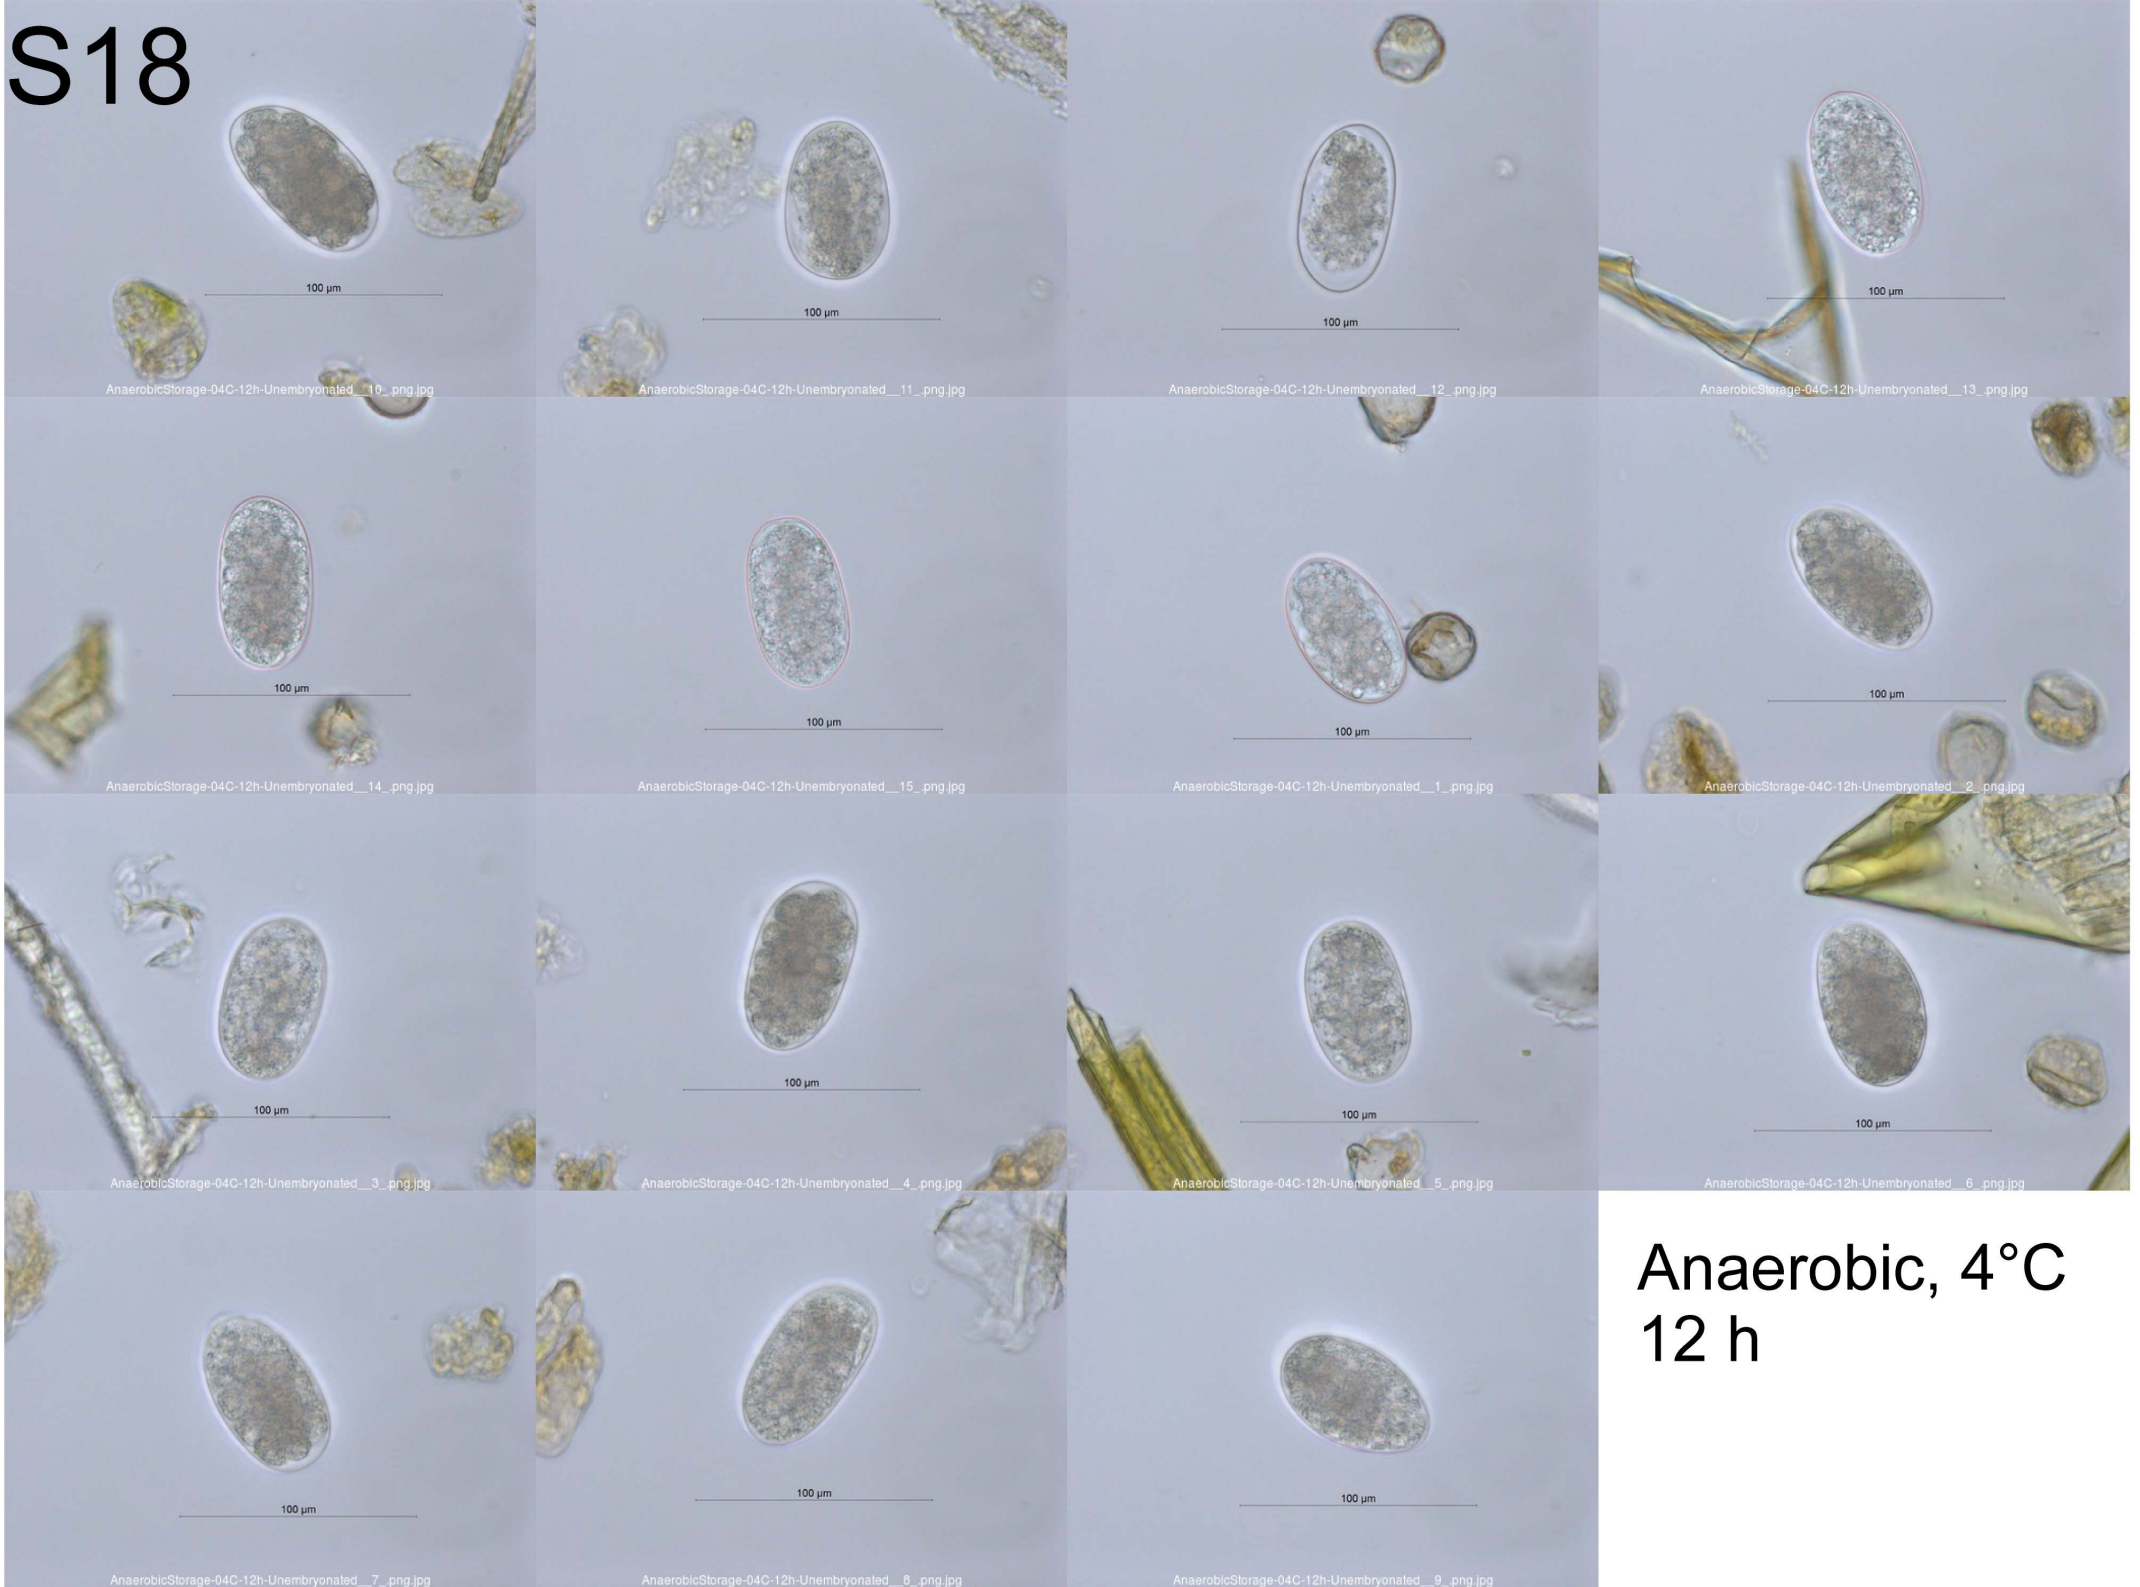

Anaerobic, 4°C  
12 h



# S19

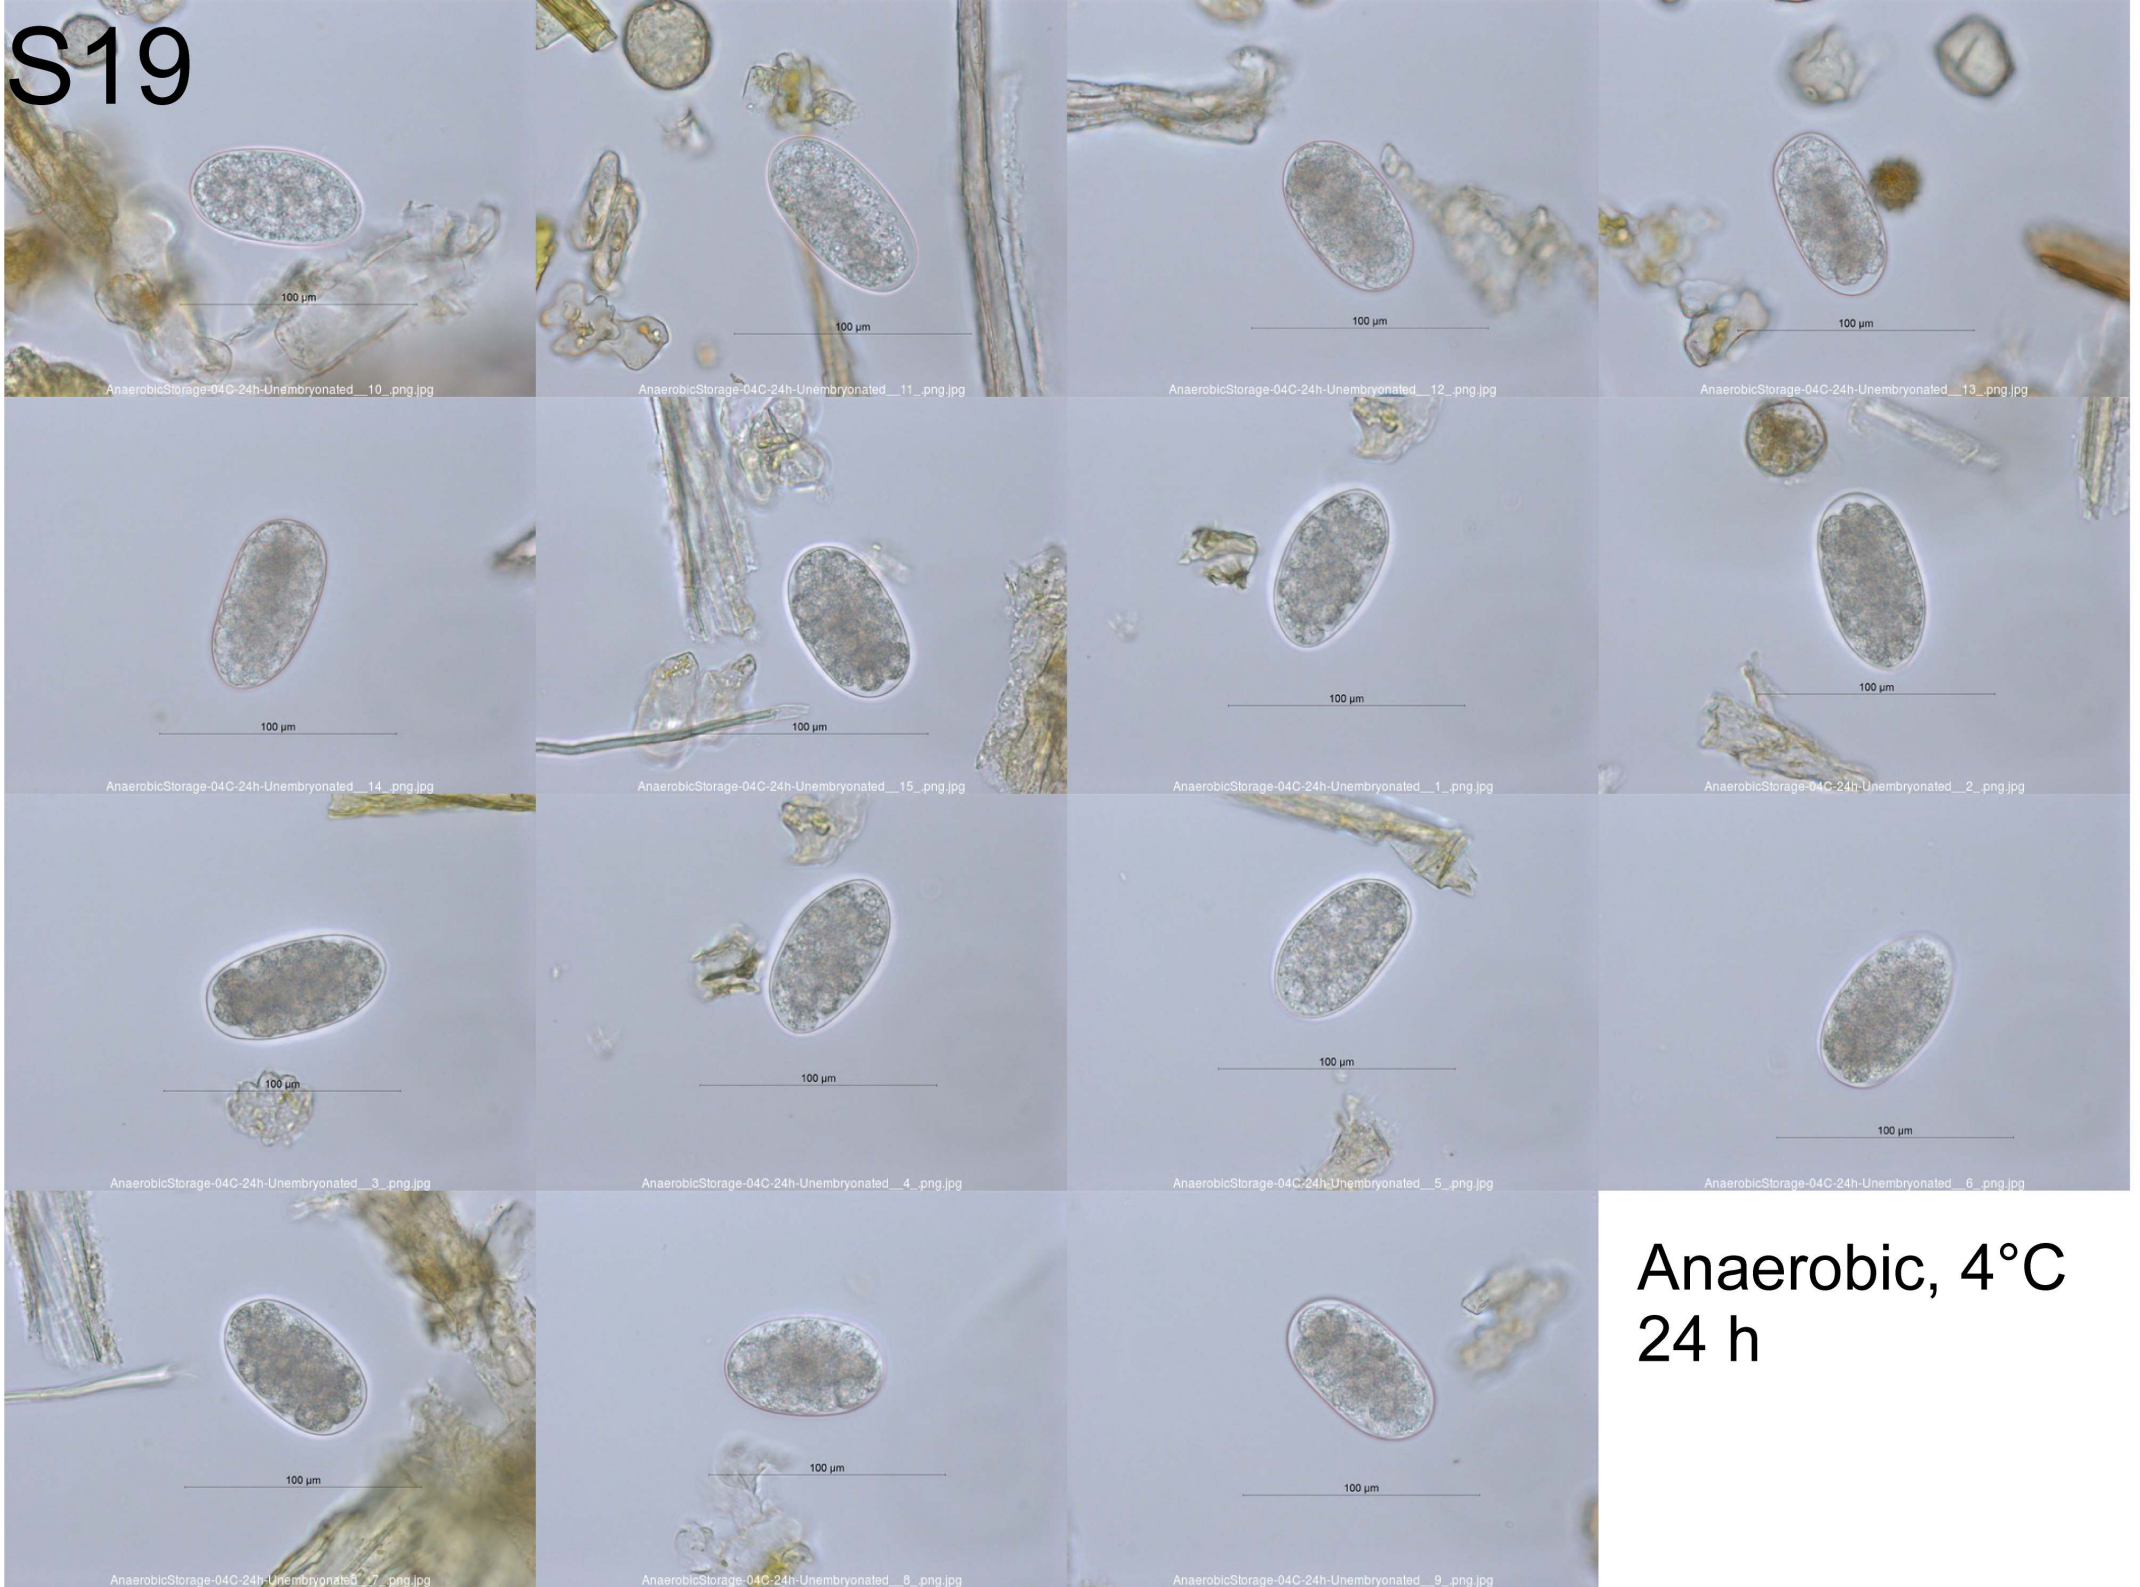

Anaerobic, 4°C  
24 h



# S20

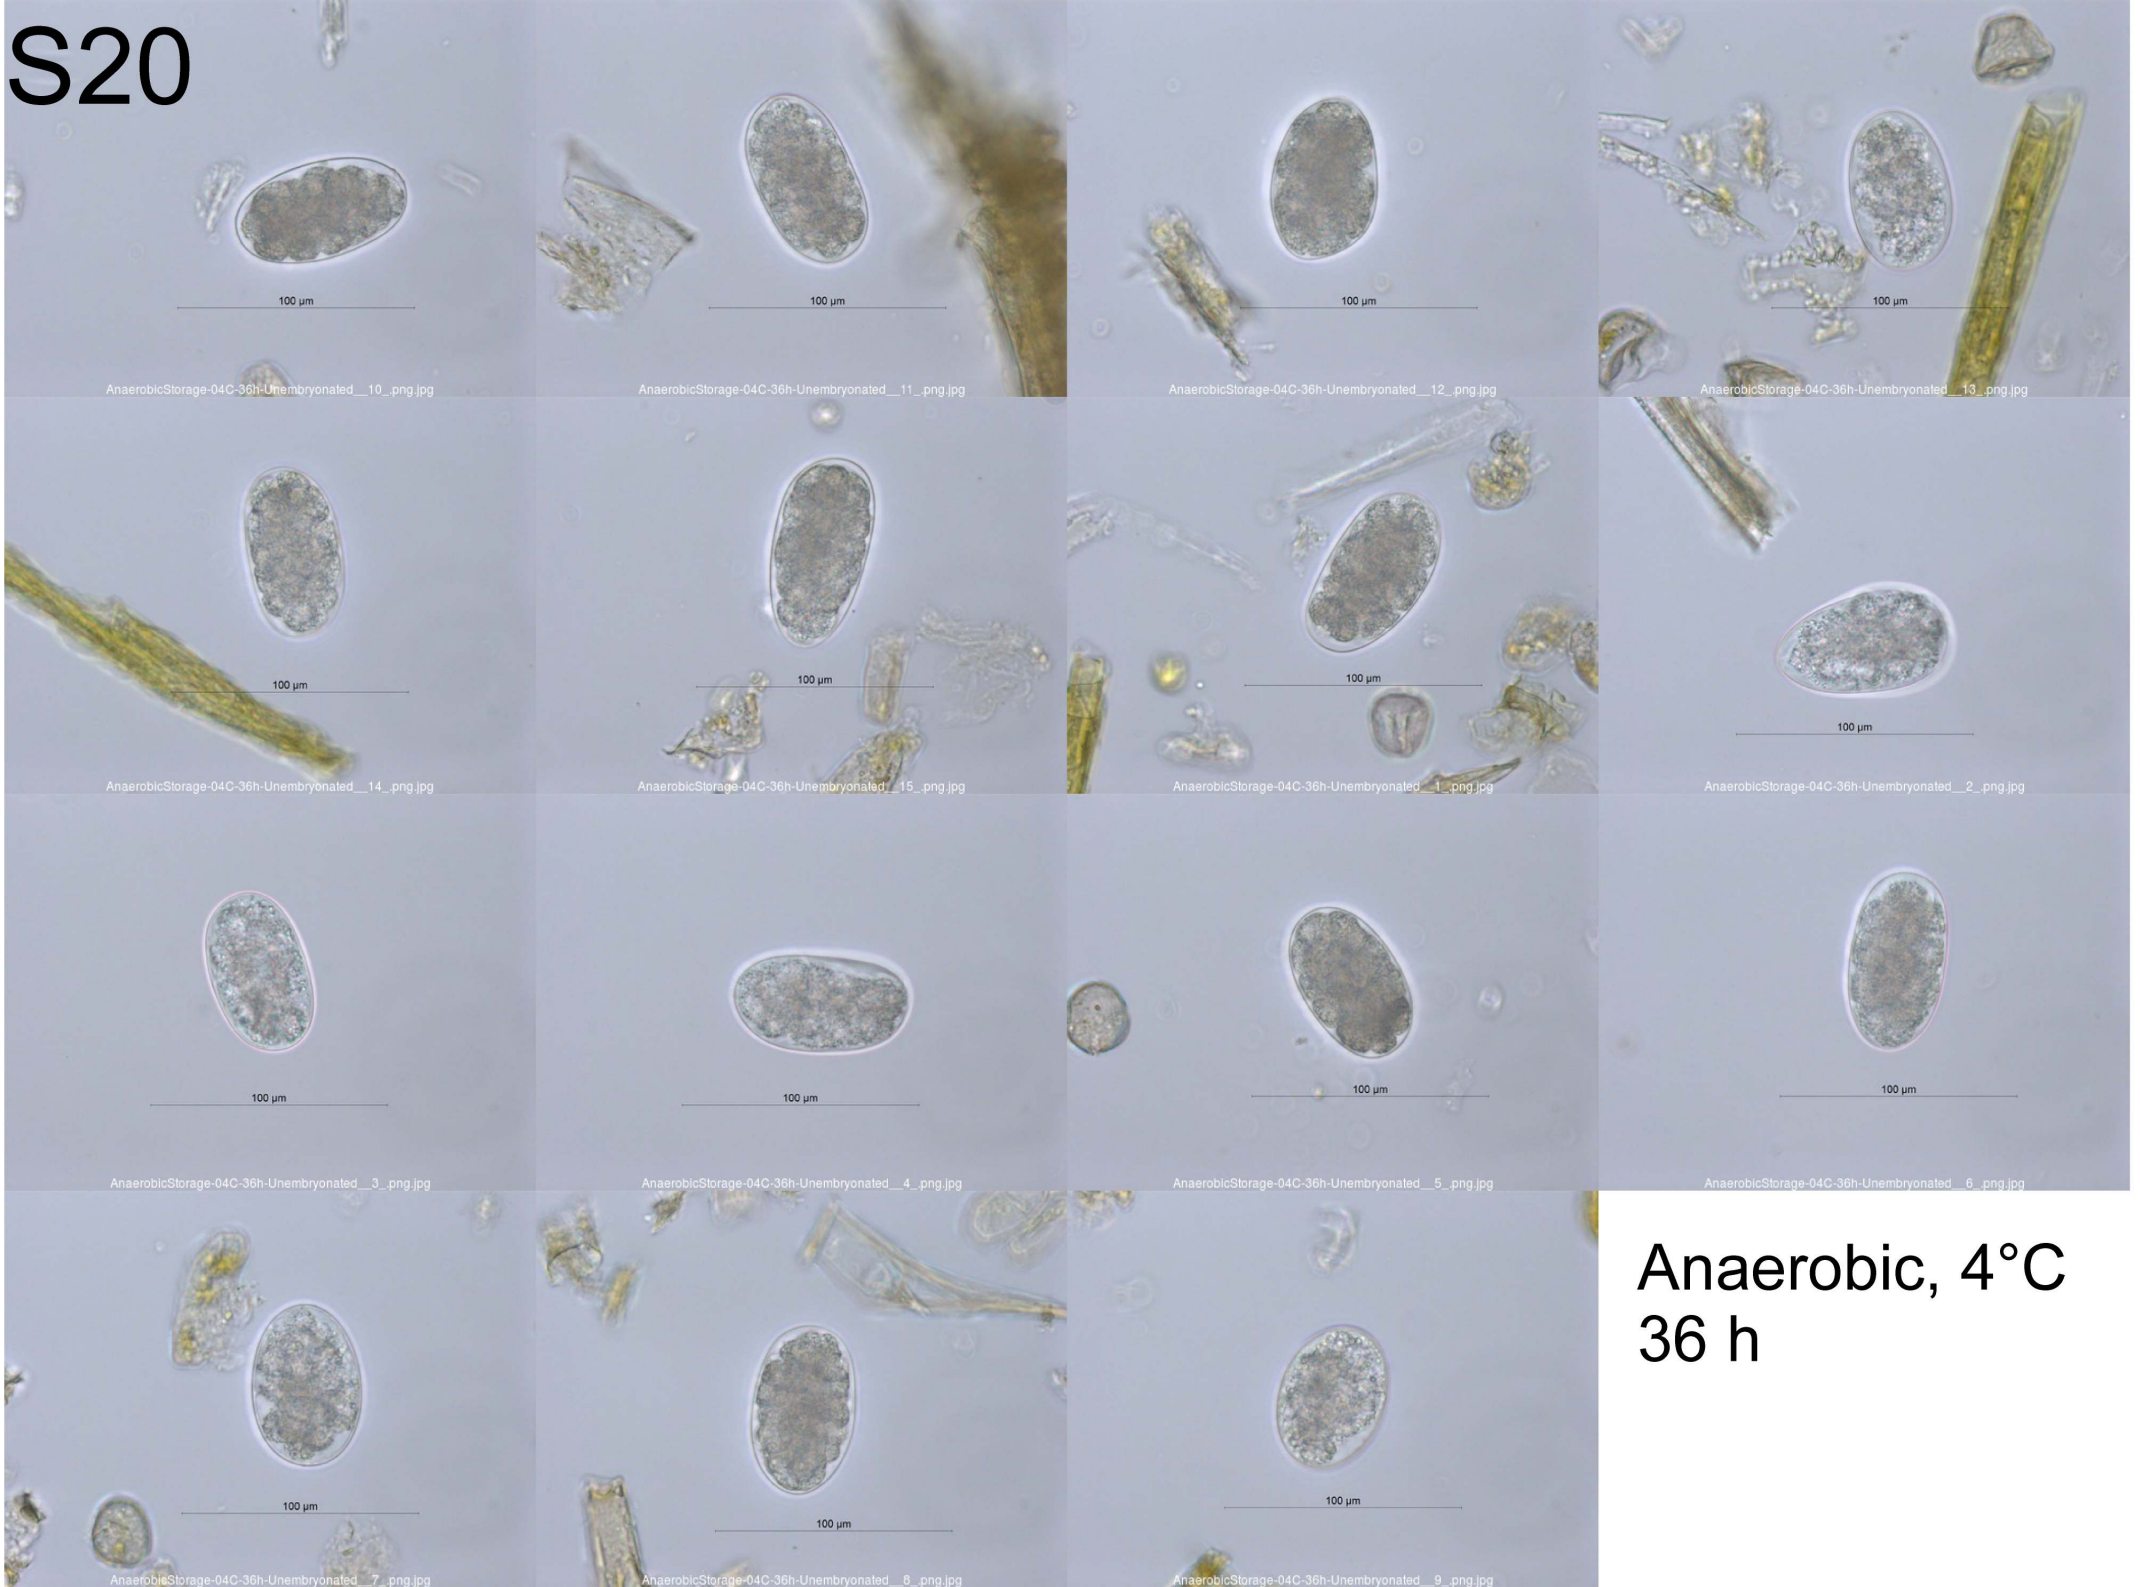

Anaerobic, 4°C  
36 h



# S21

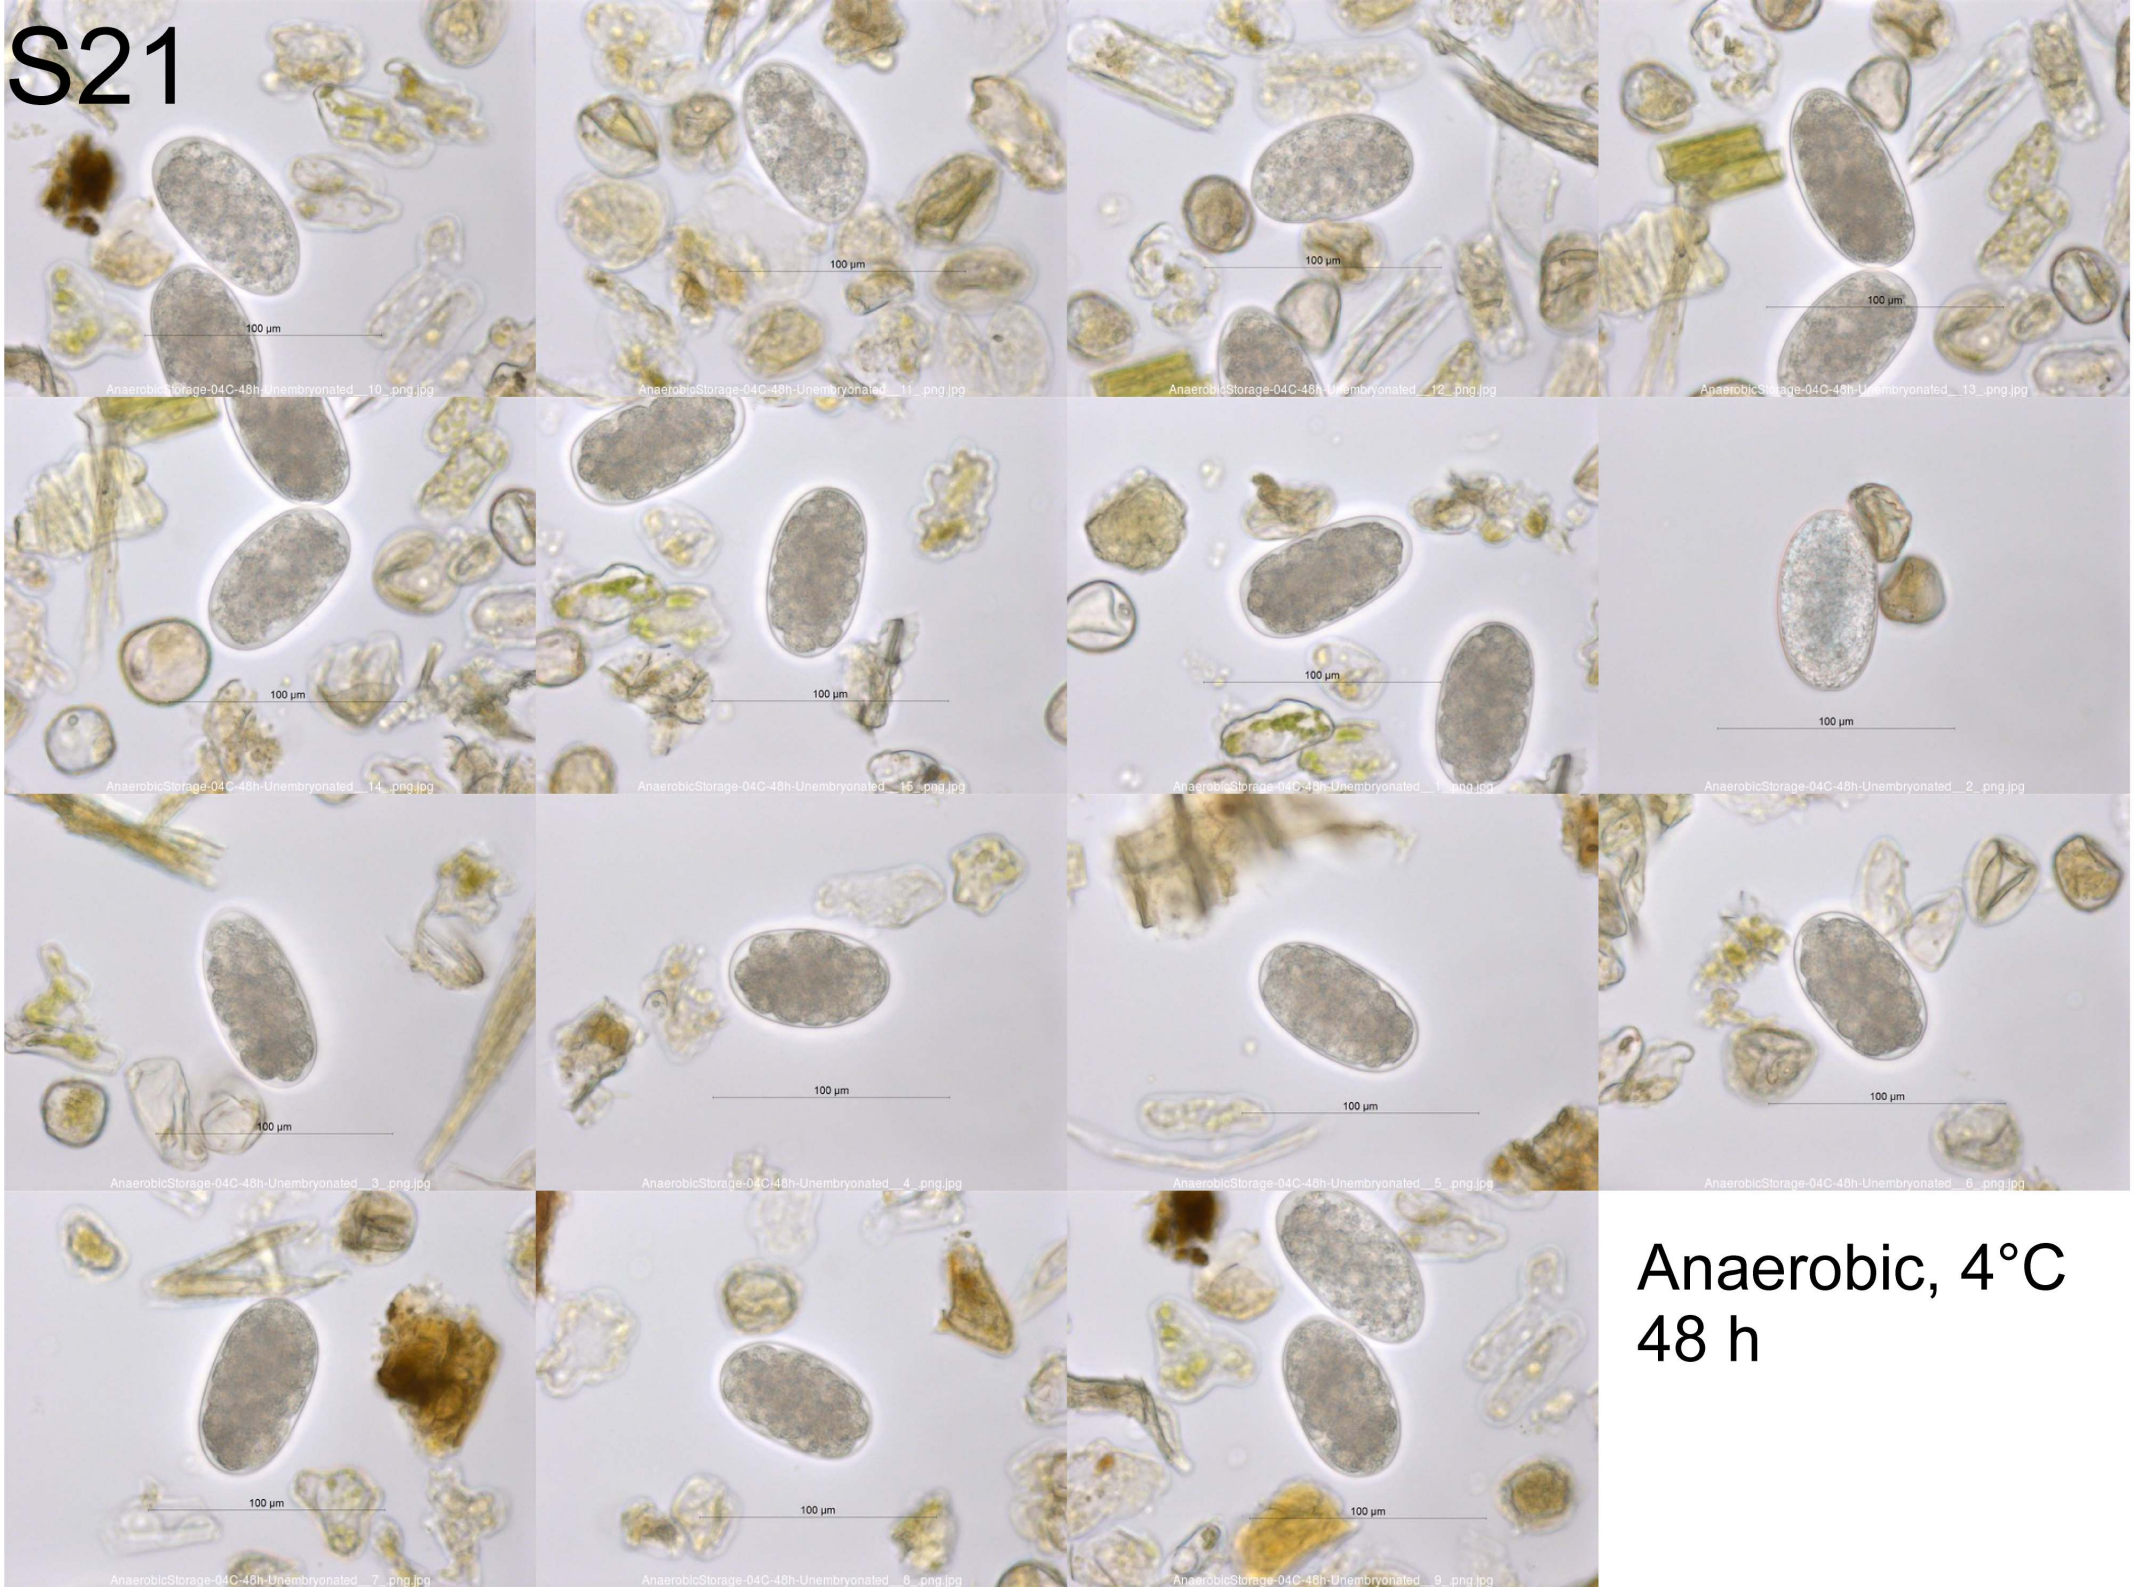

Anaerobic, 4°C  
48 h



# S22

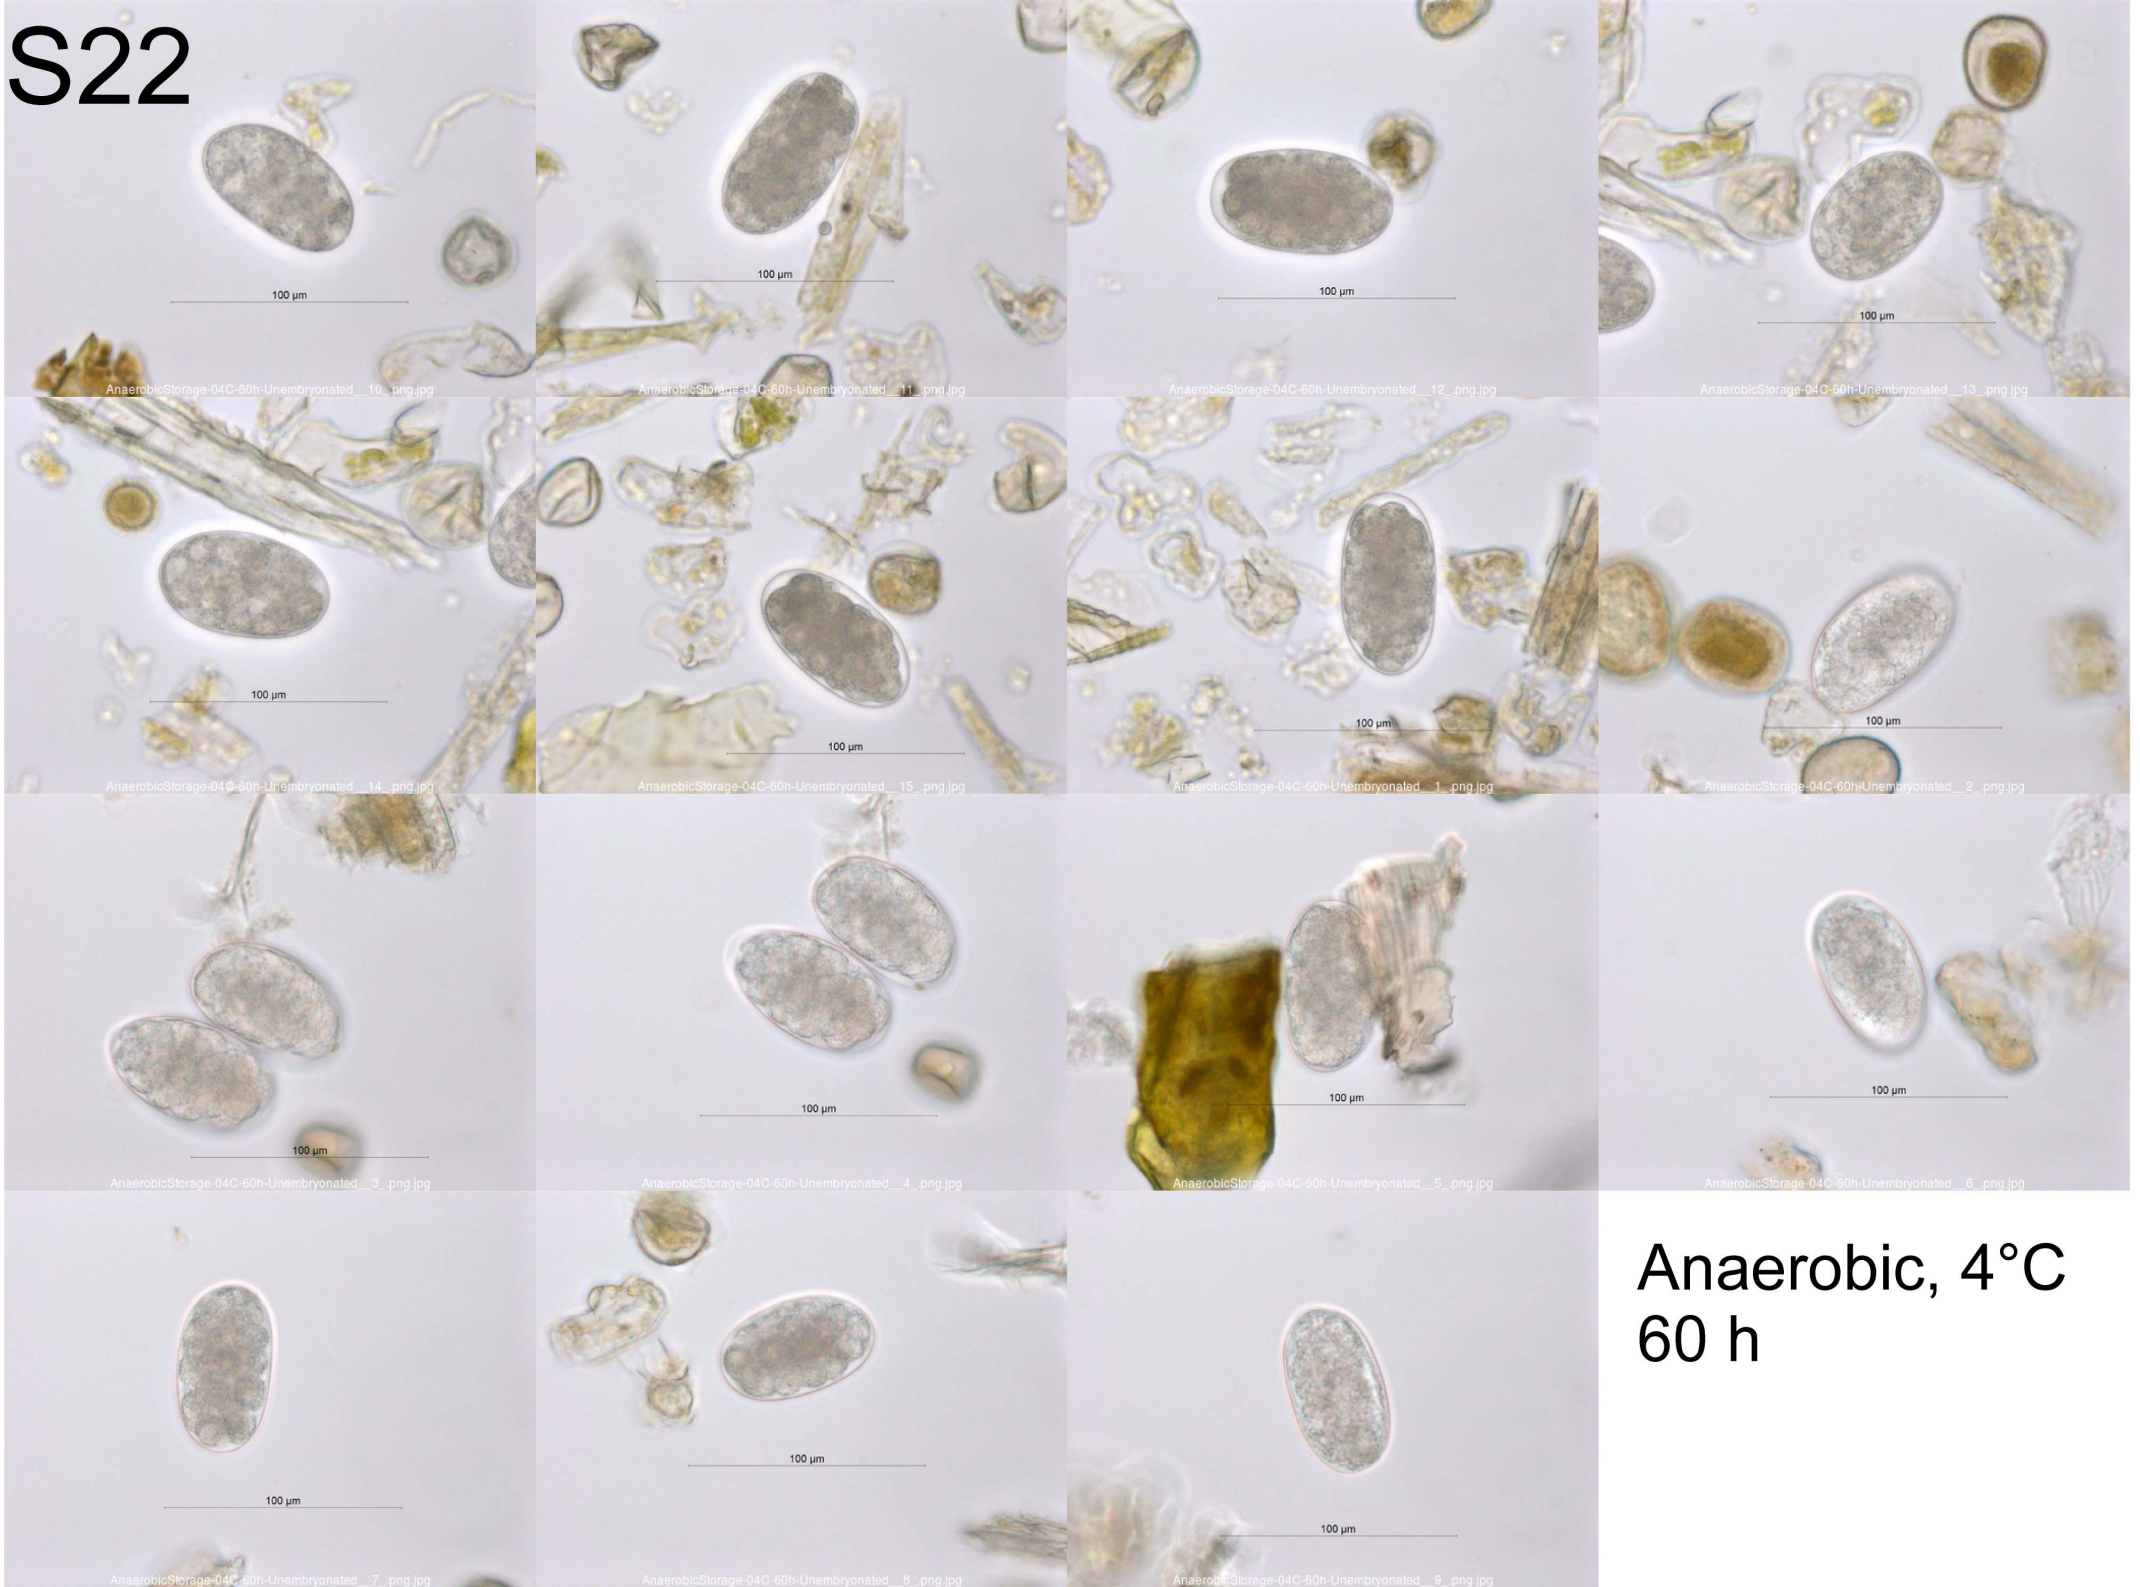

Anaerobic, 4°C  
60 h



# S23

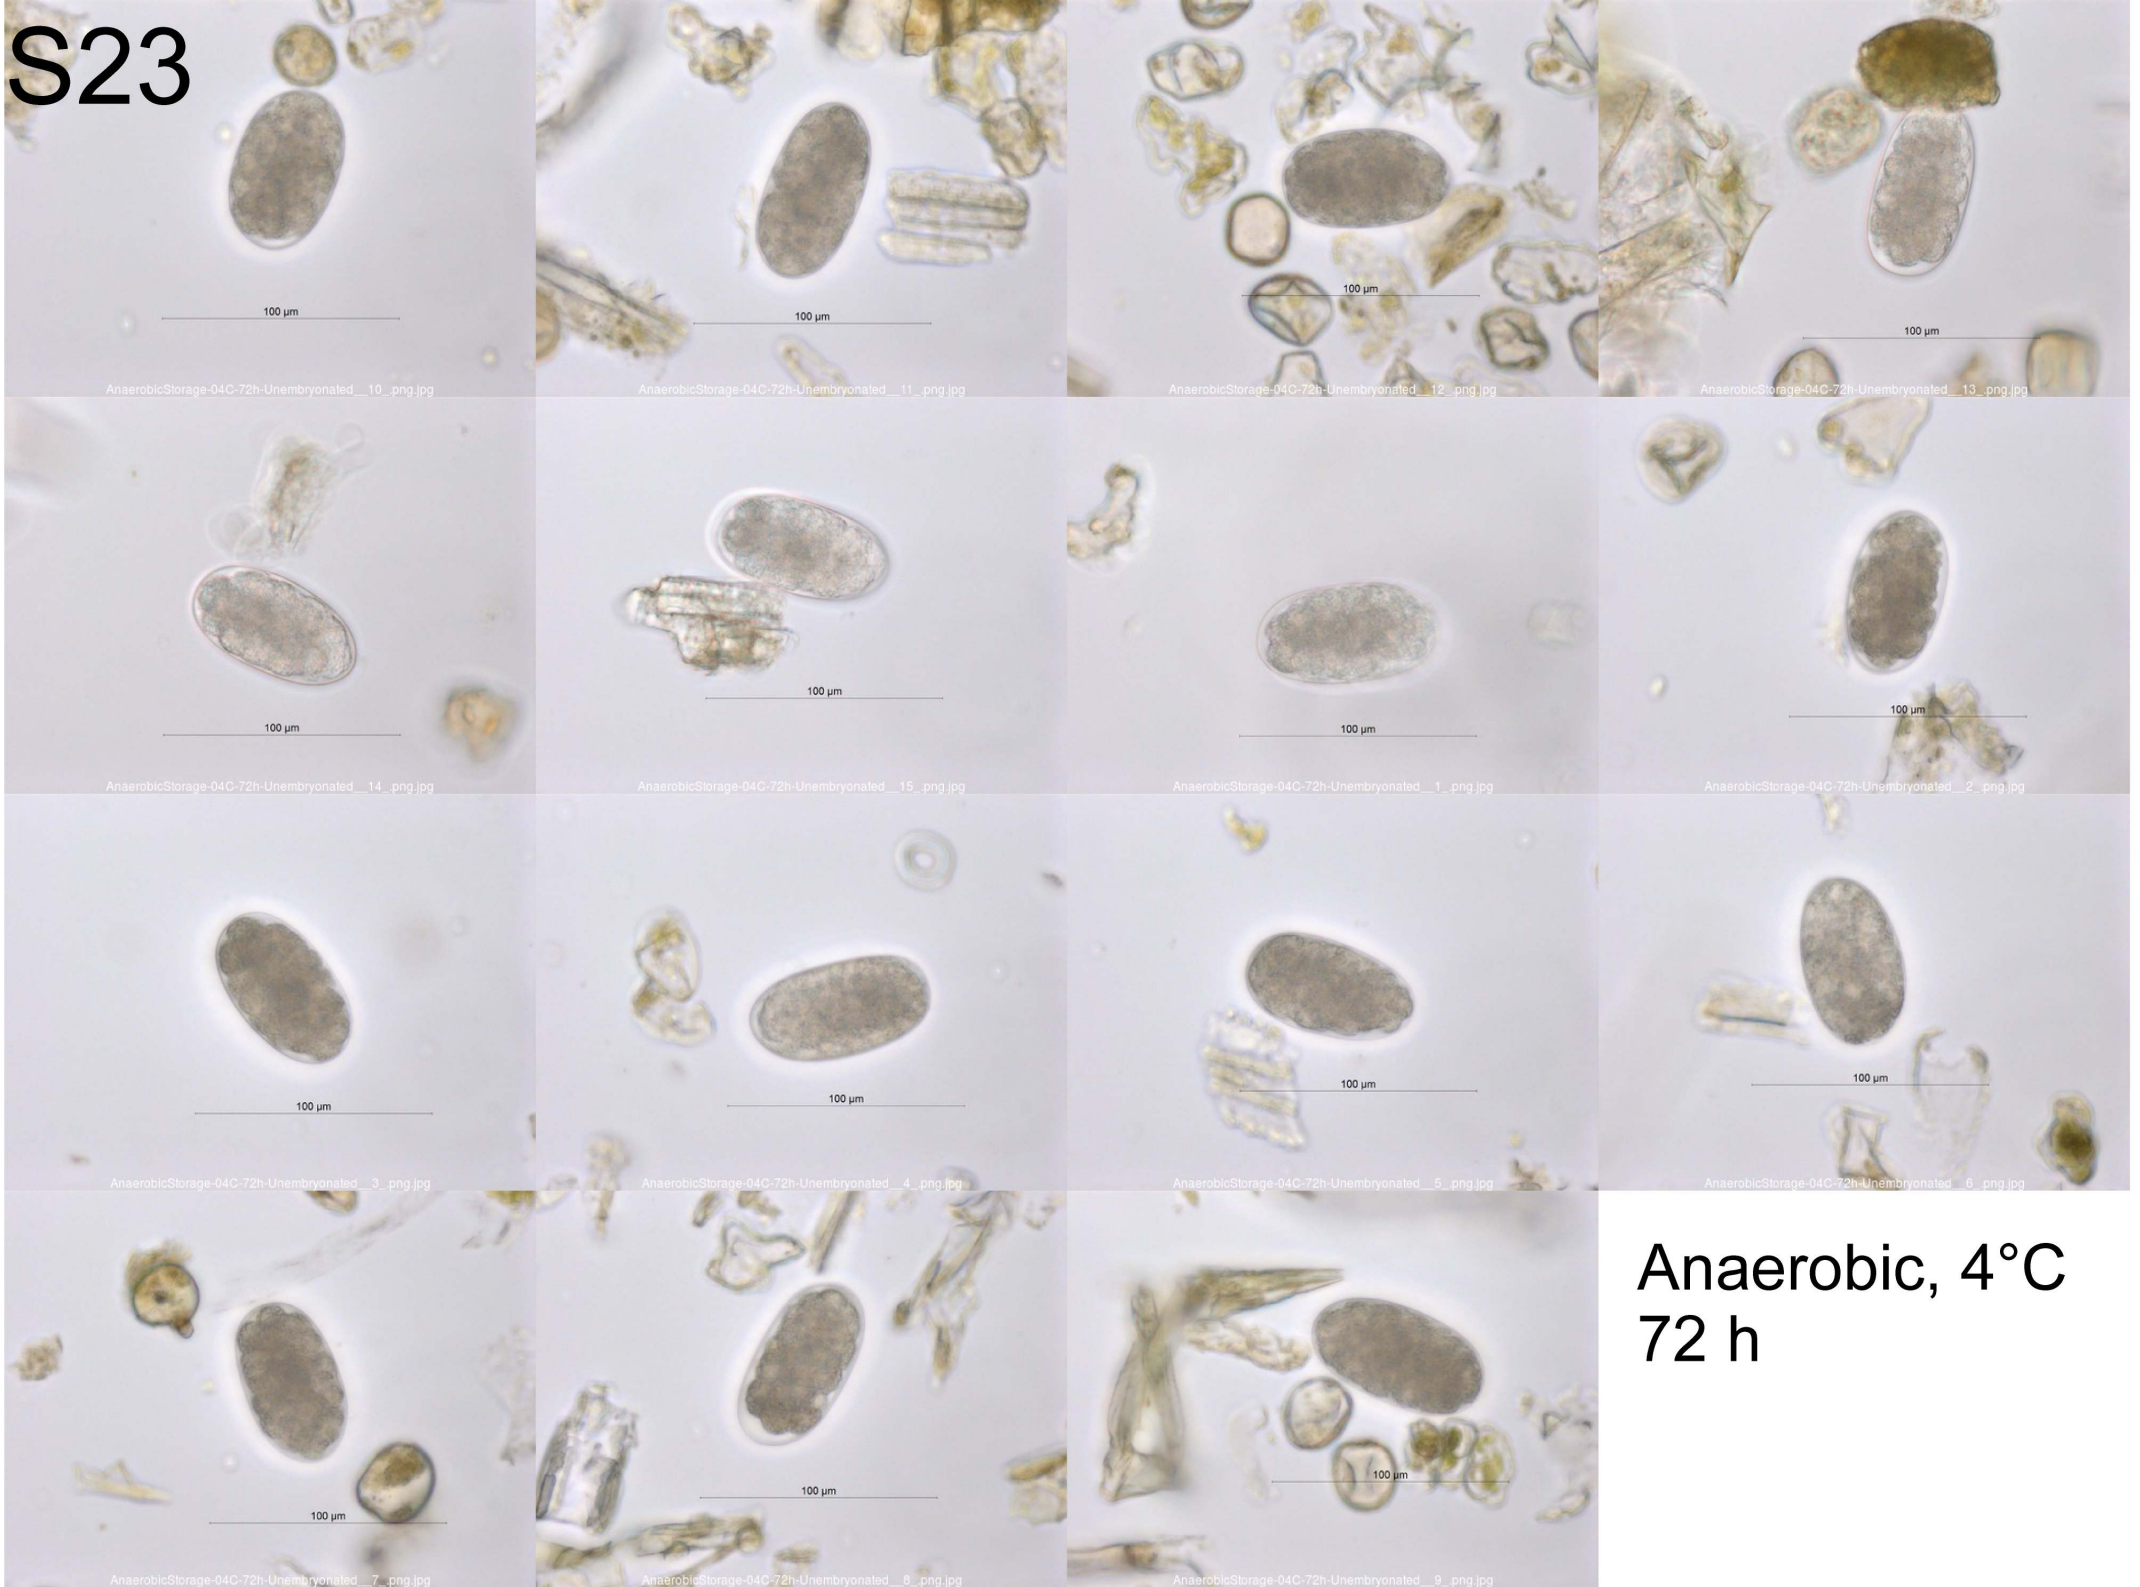

Anaerobic, 4°C  
72 h



# S24

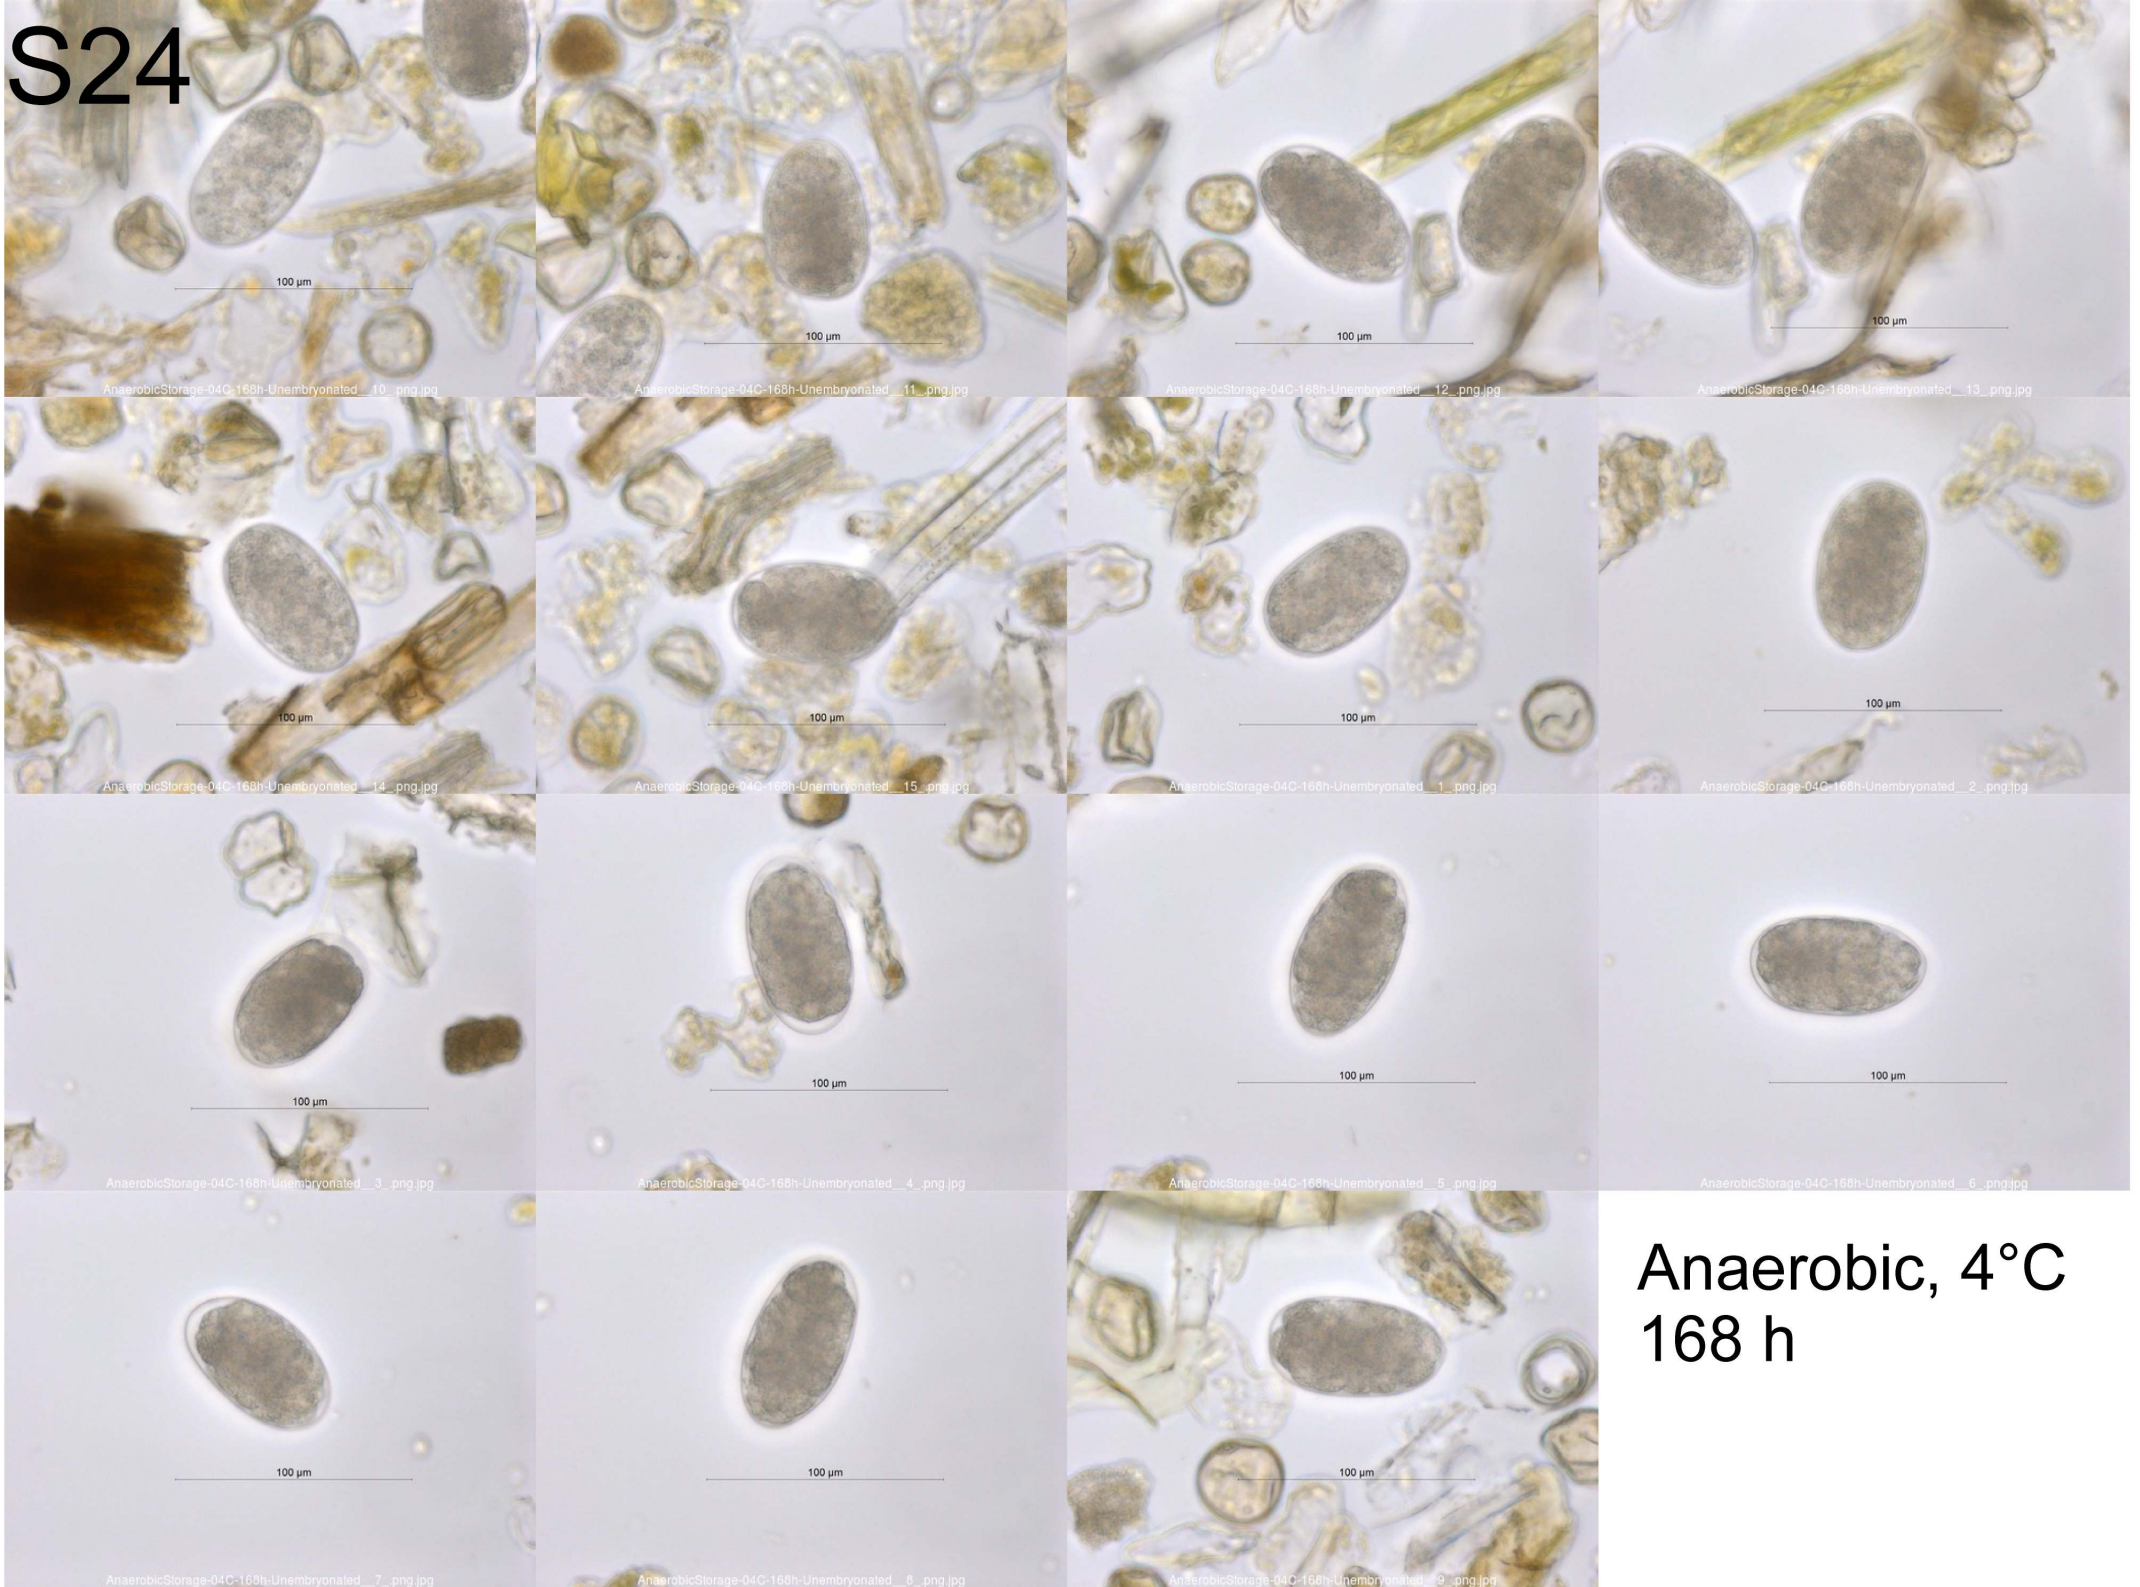

Anaerobic, 4°C  
168 h



# S25

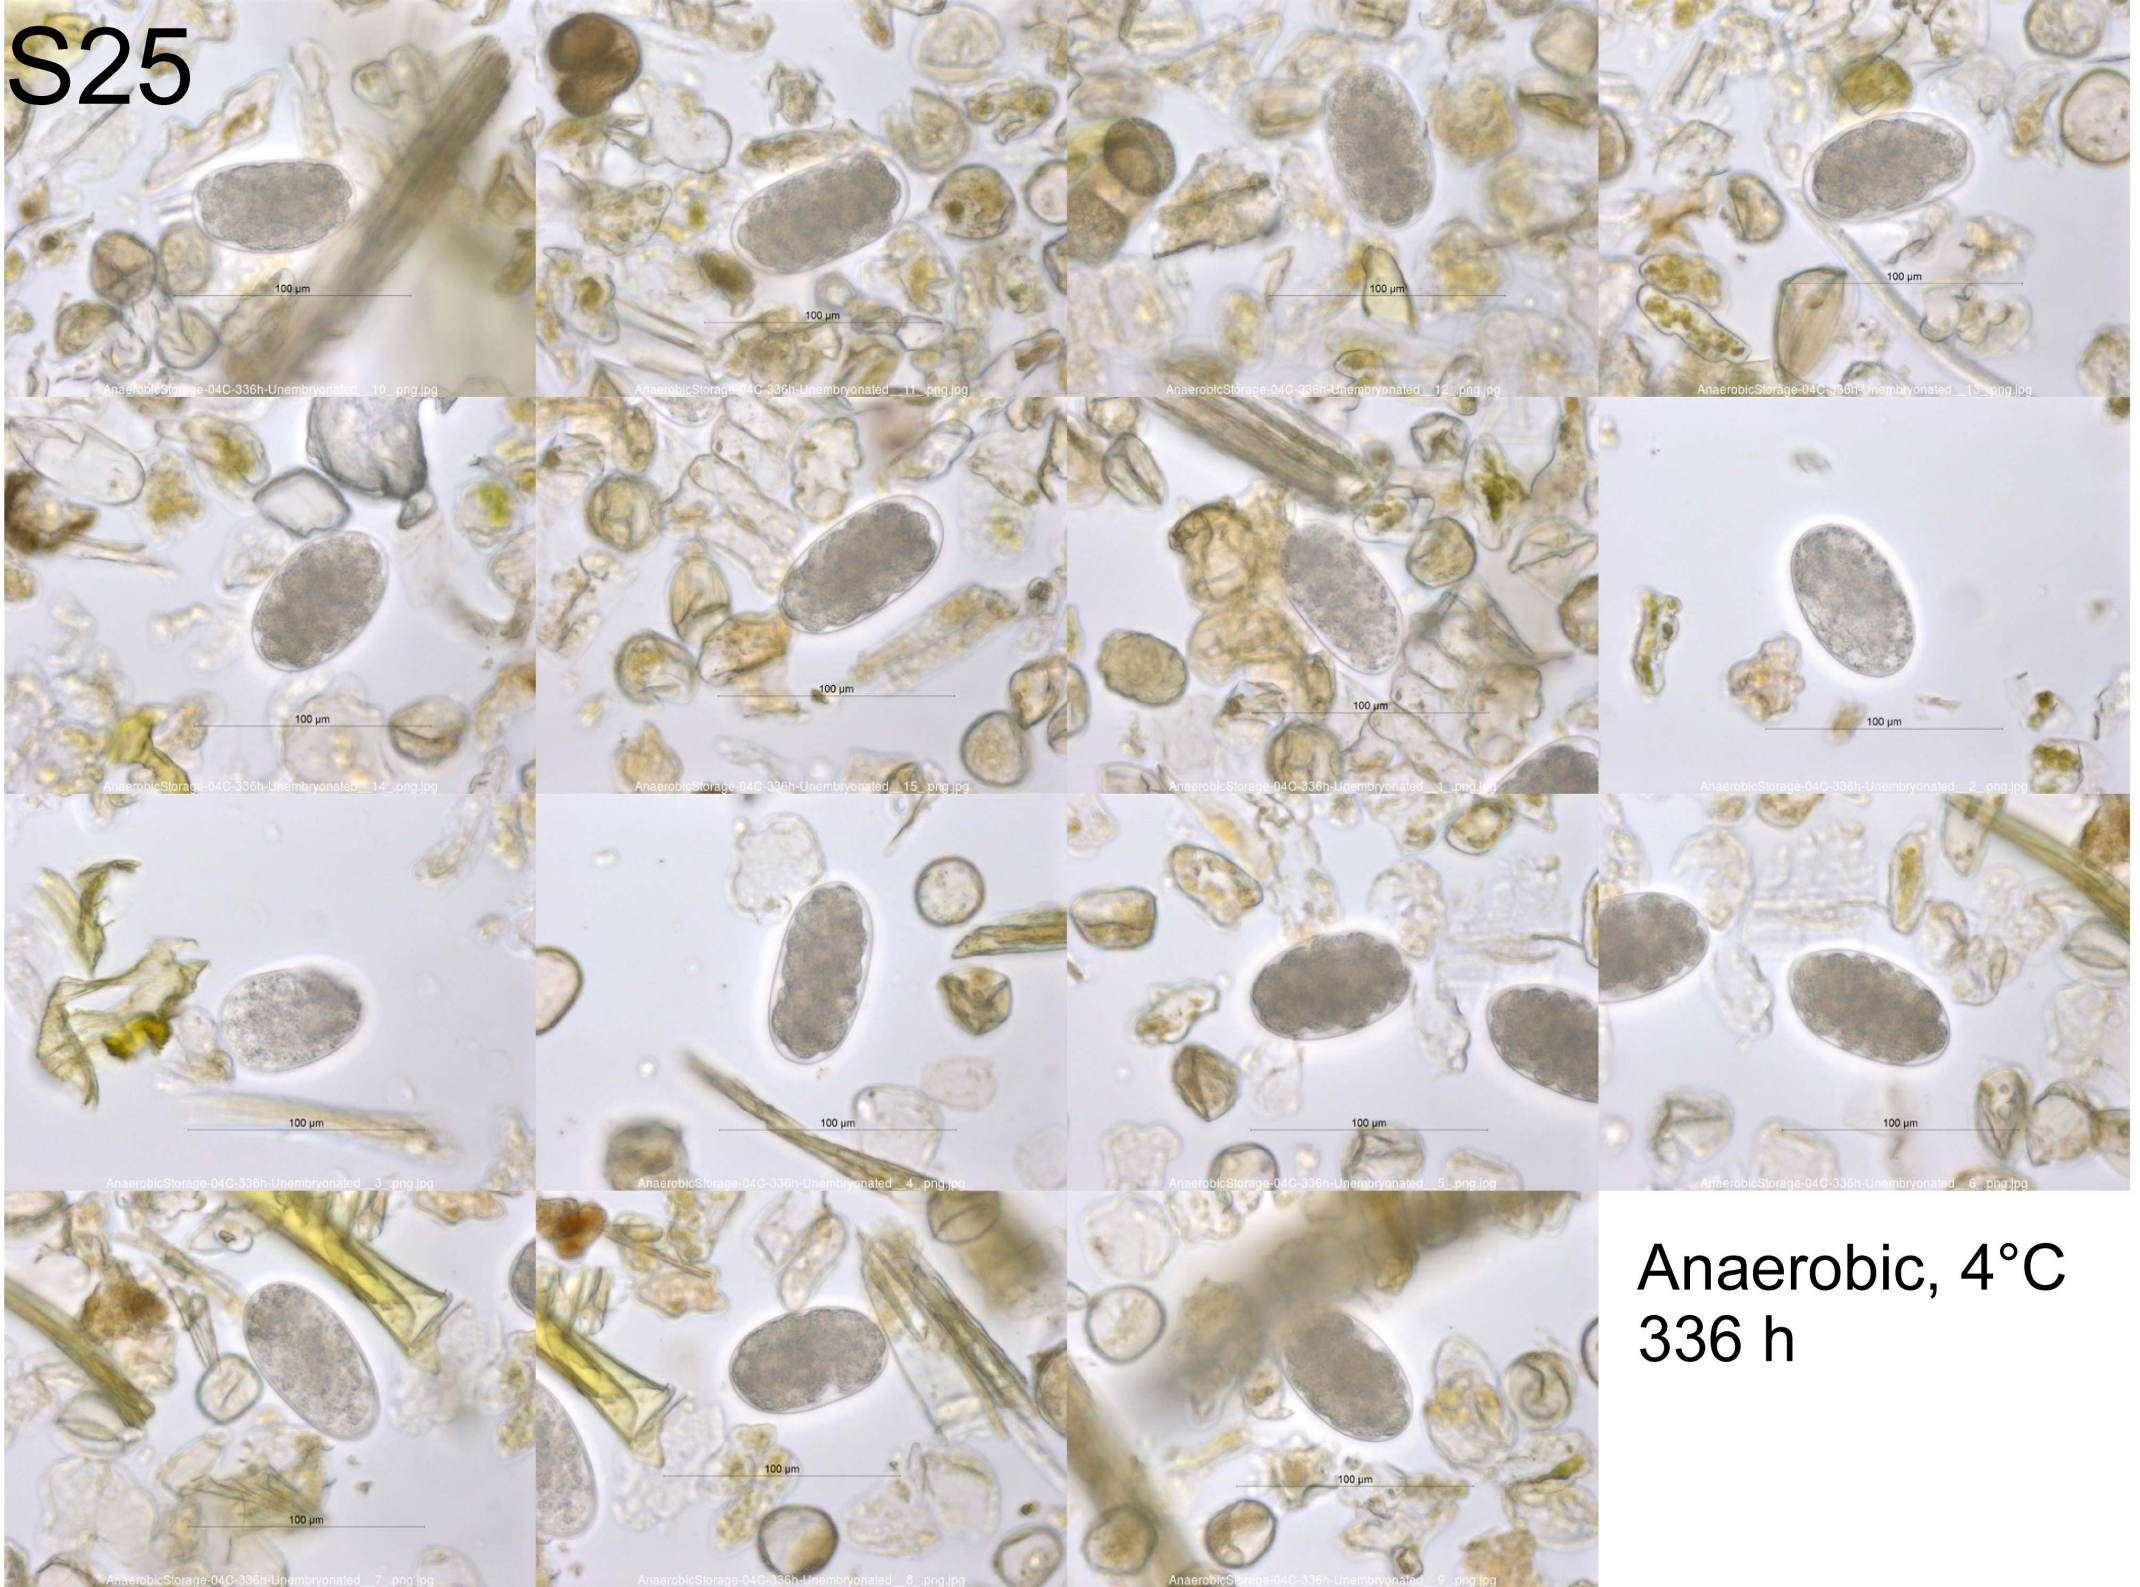

Anaerobic, 4°C  
336 h



# S26

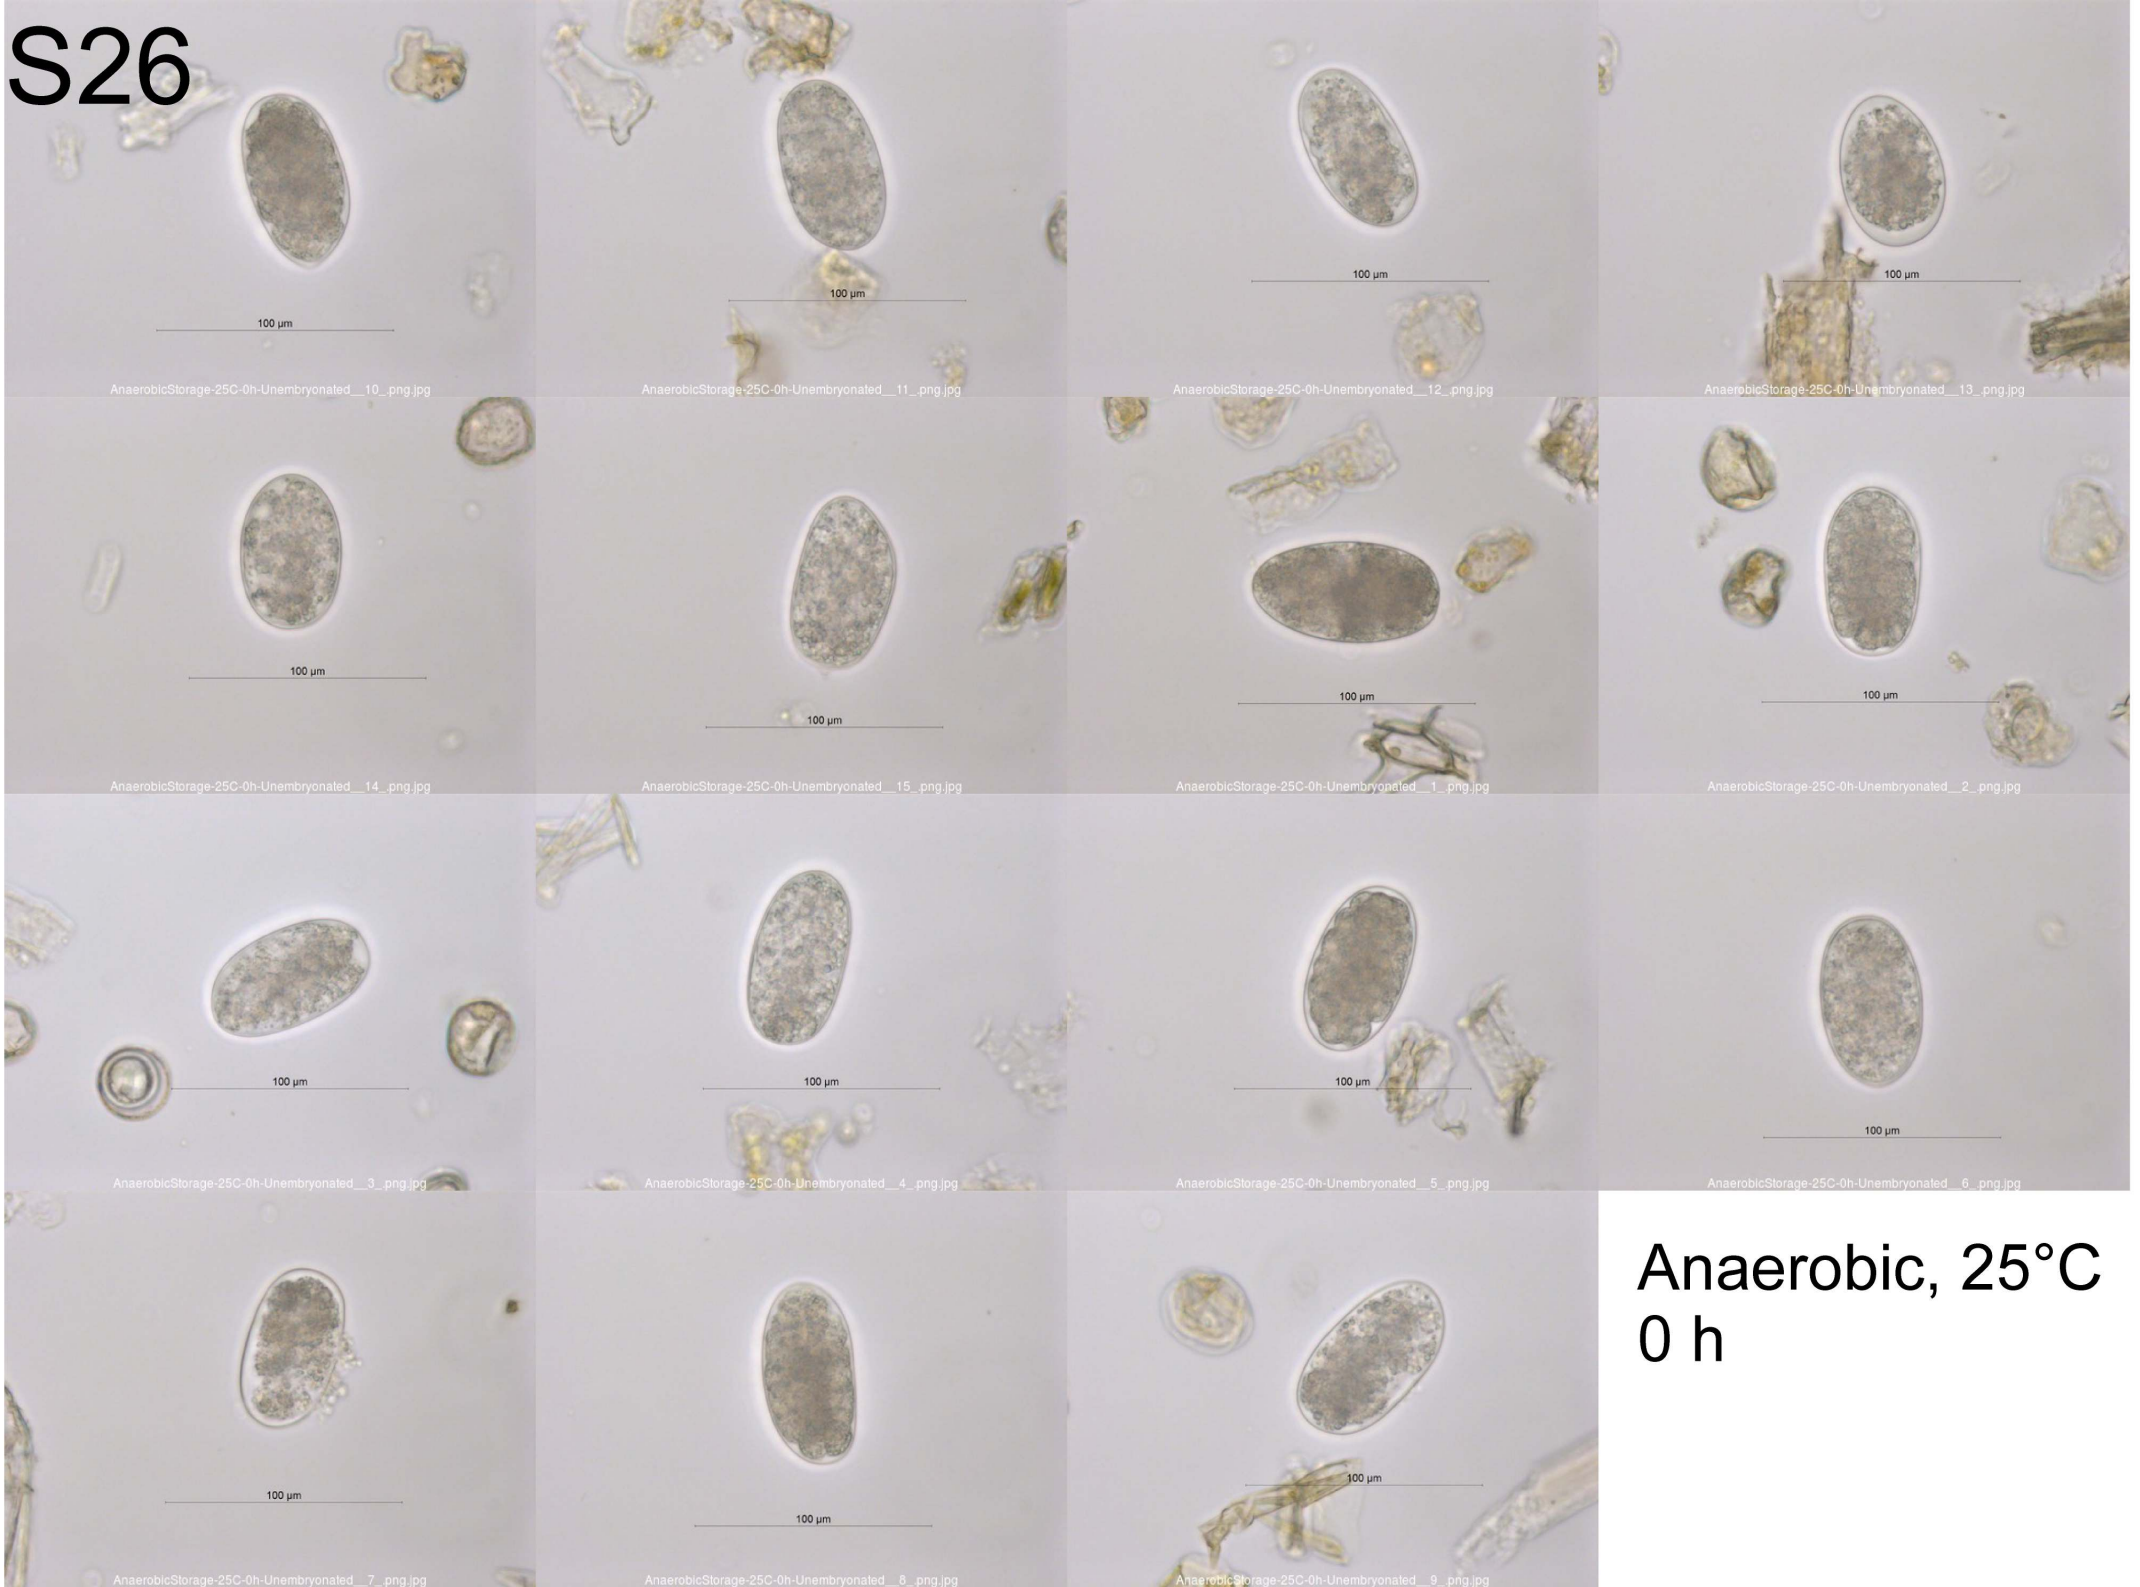

Anaerobic, 25°C  
0 h



# S27

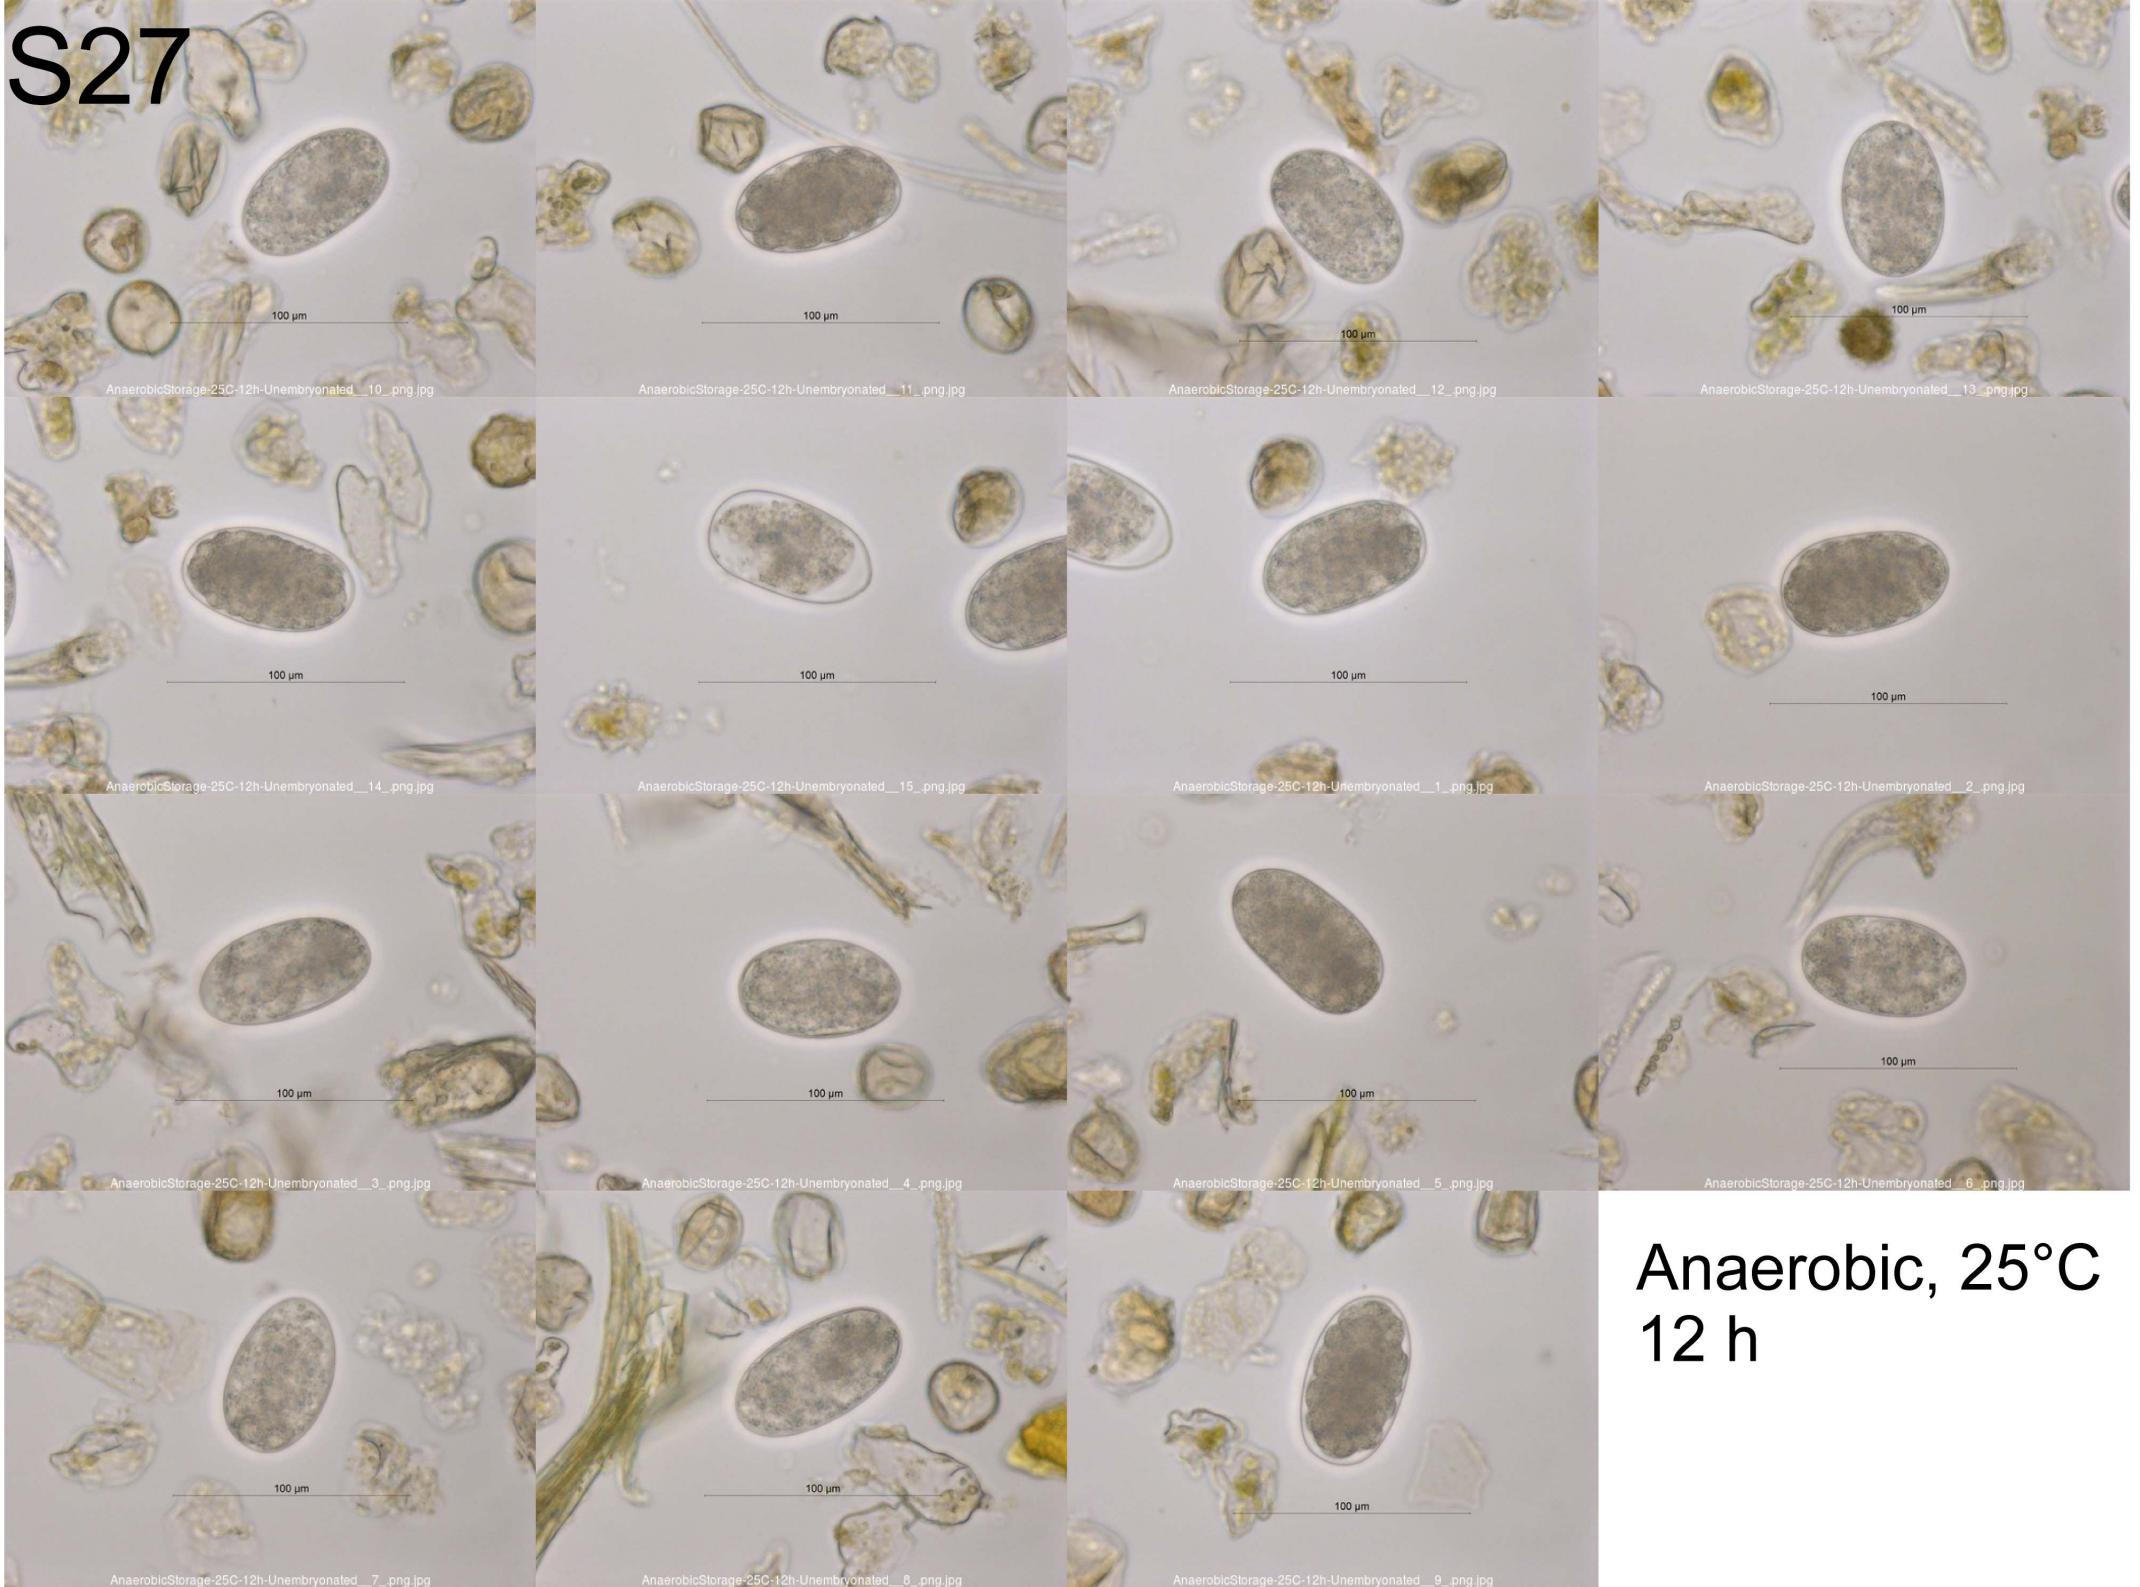

Anaerobic, 25°C  
12 h



# S28

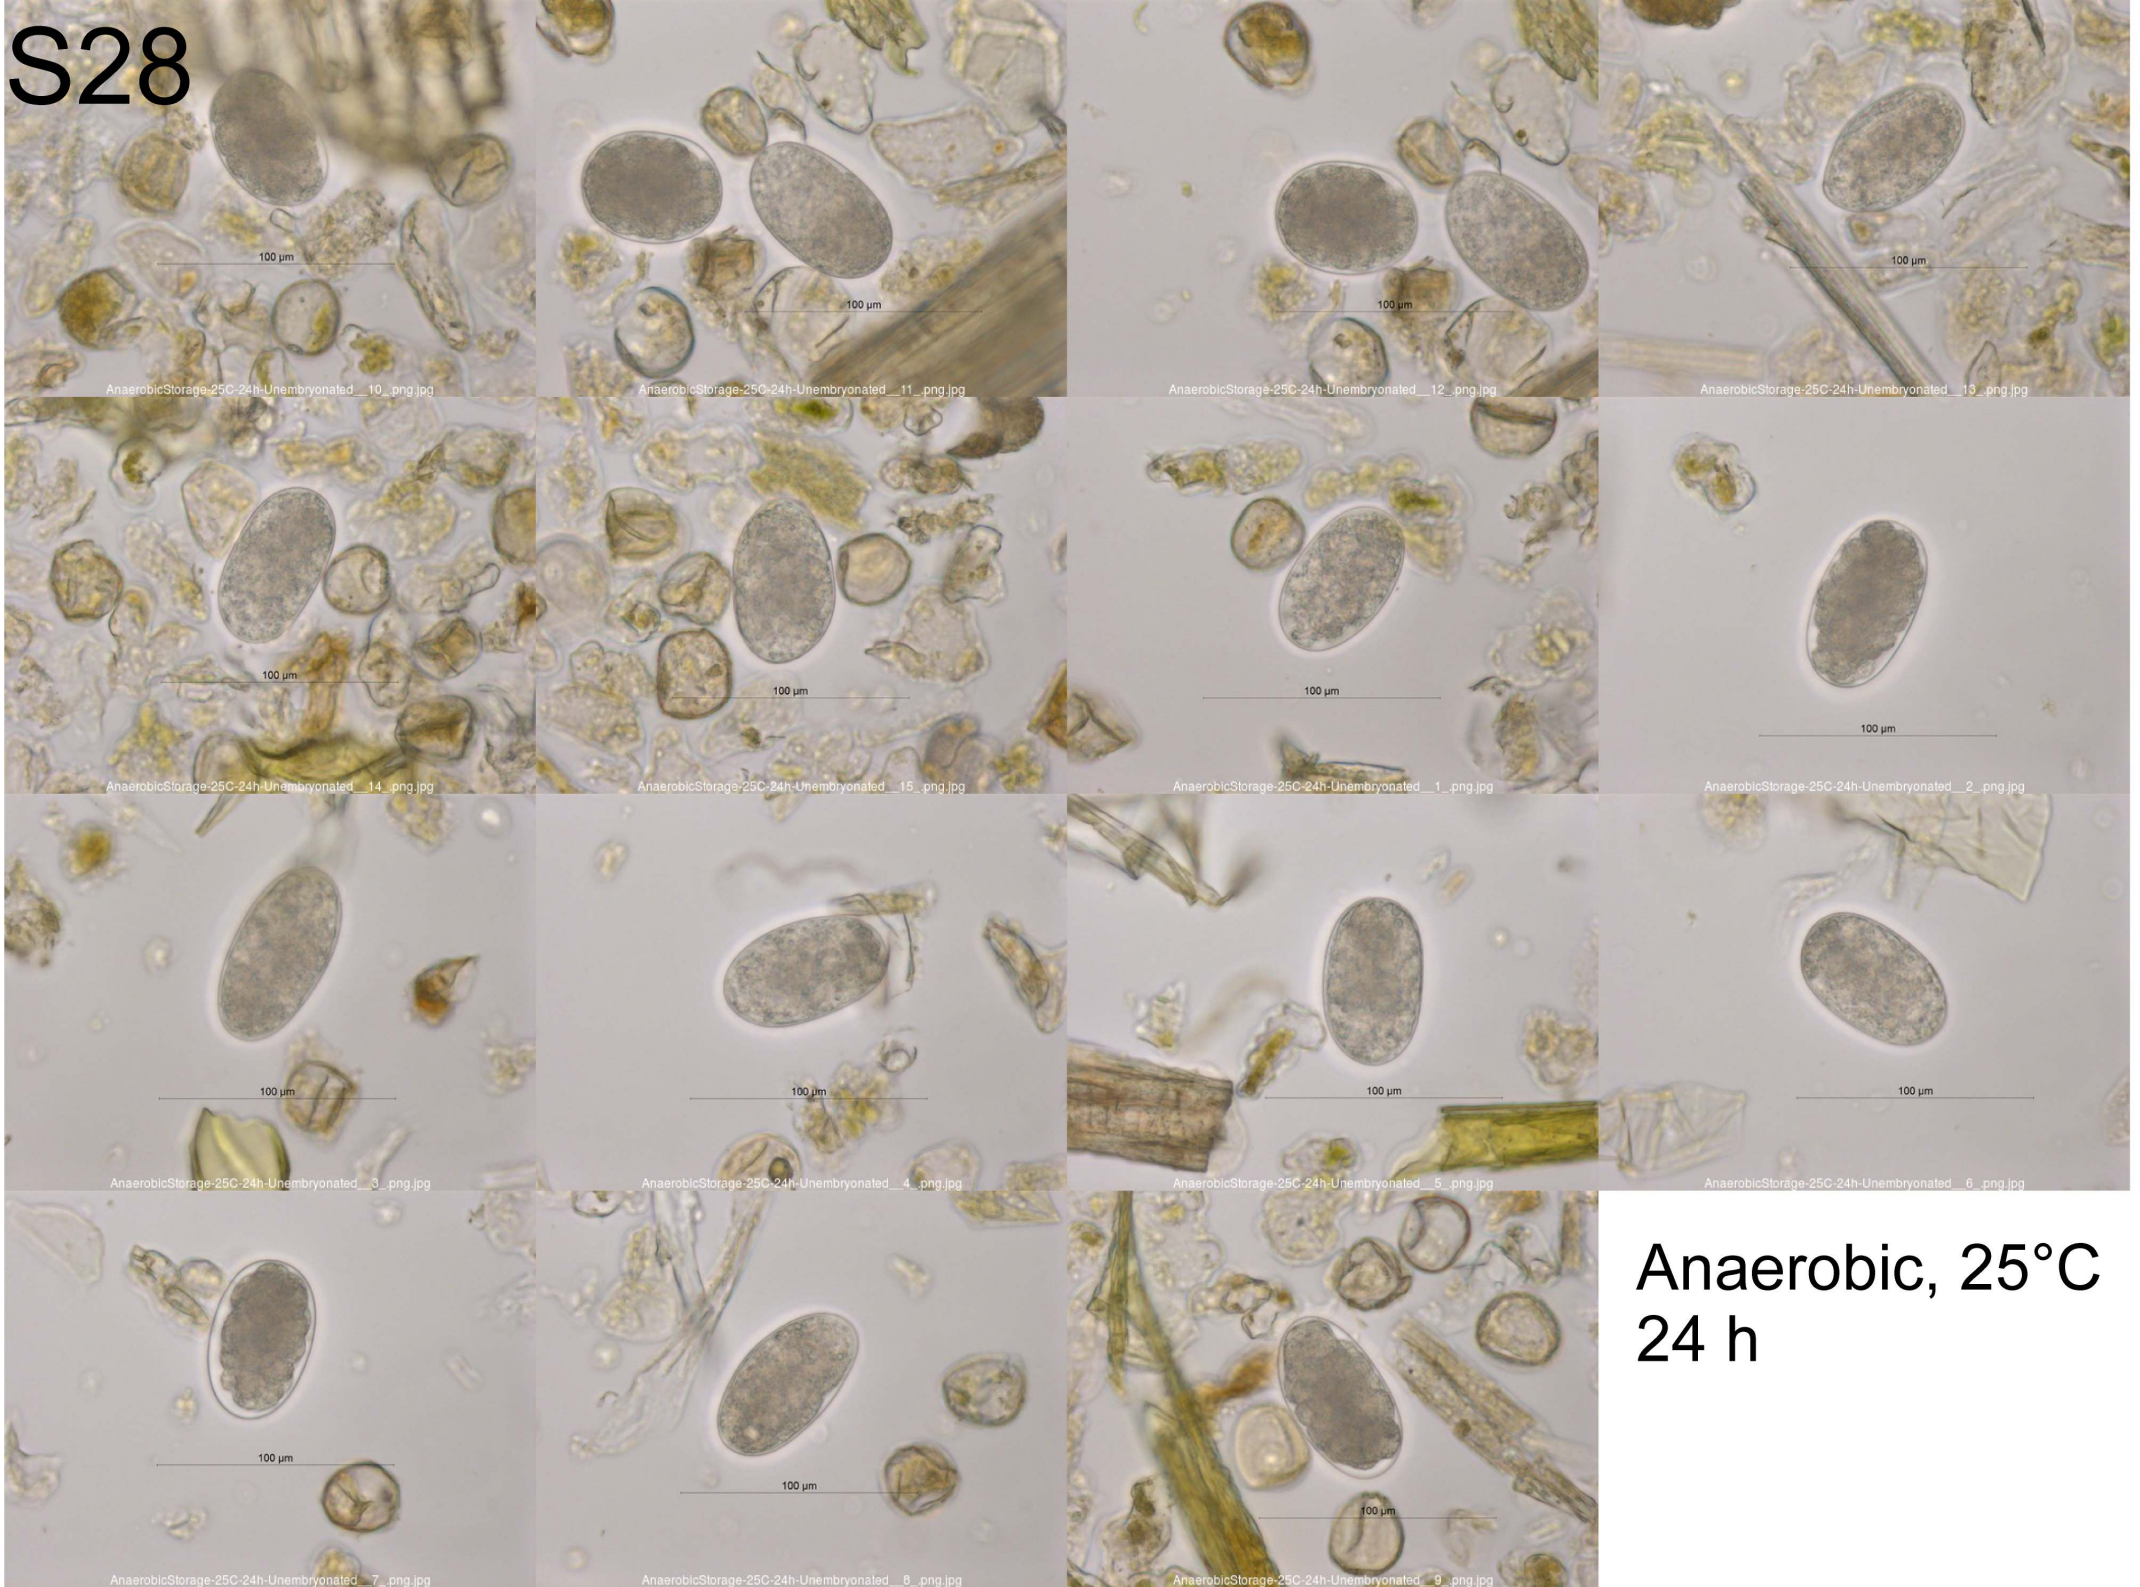

Anaerobic, 25°C  
24 h



# S29

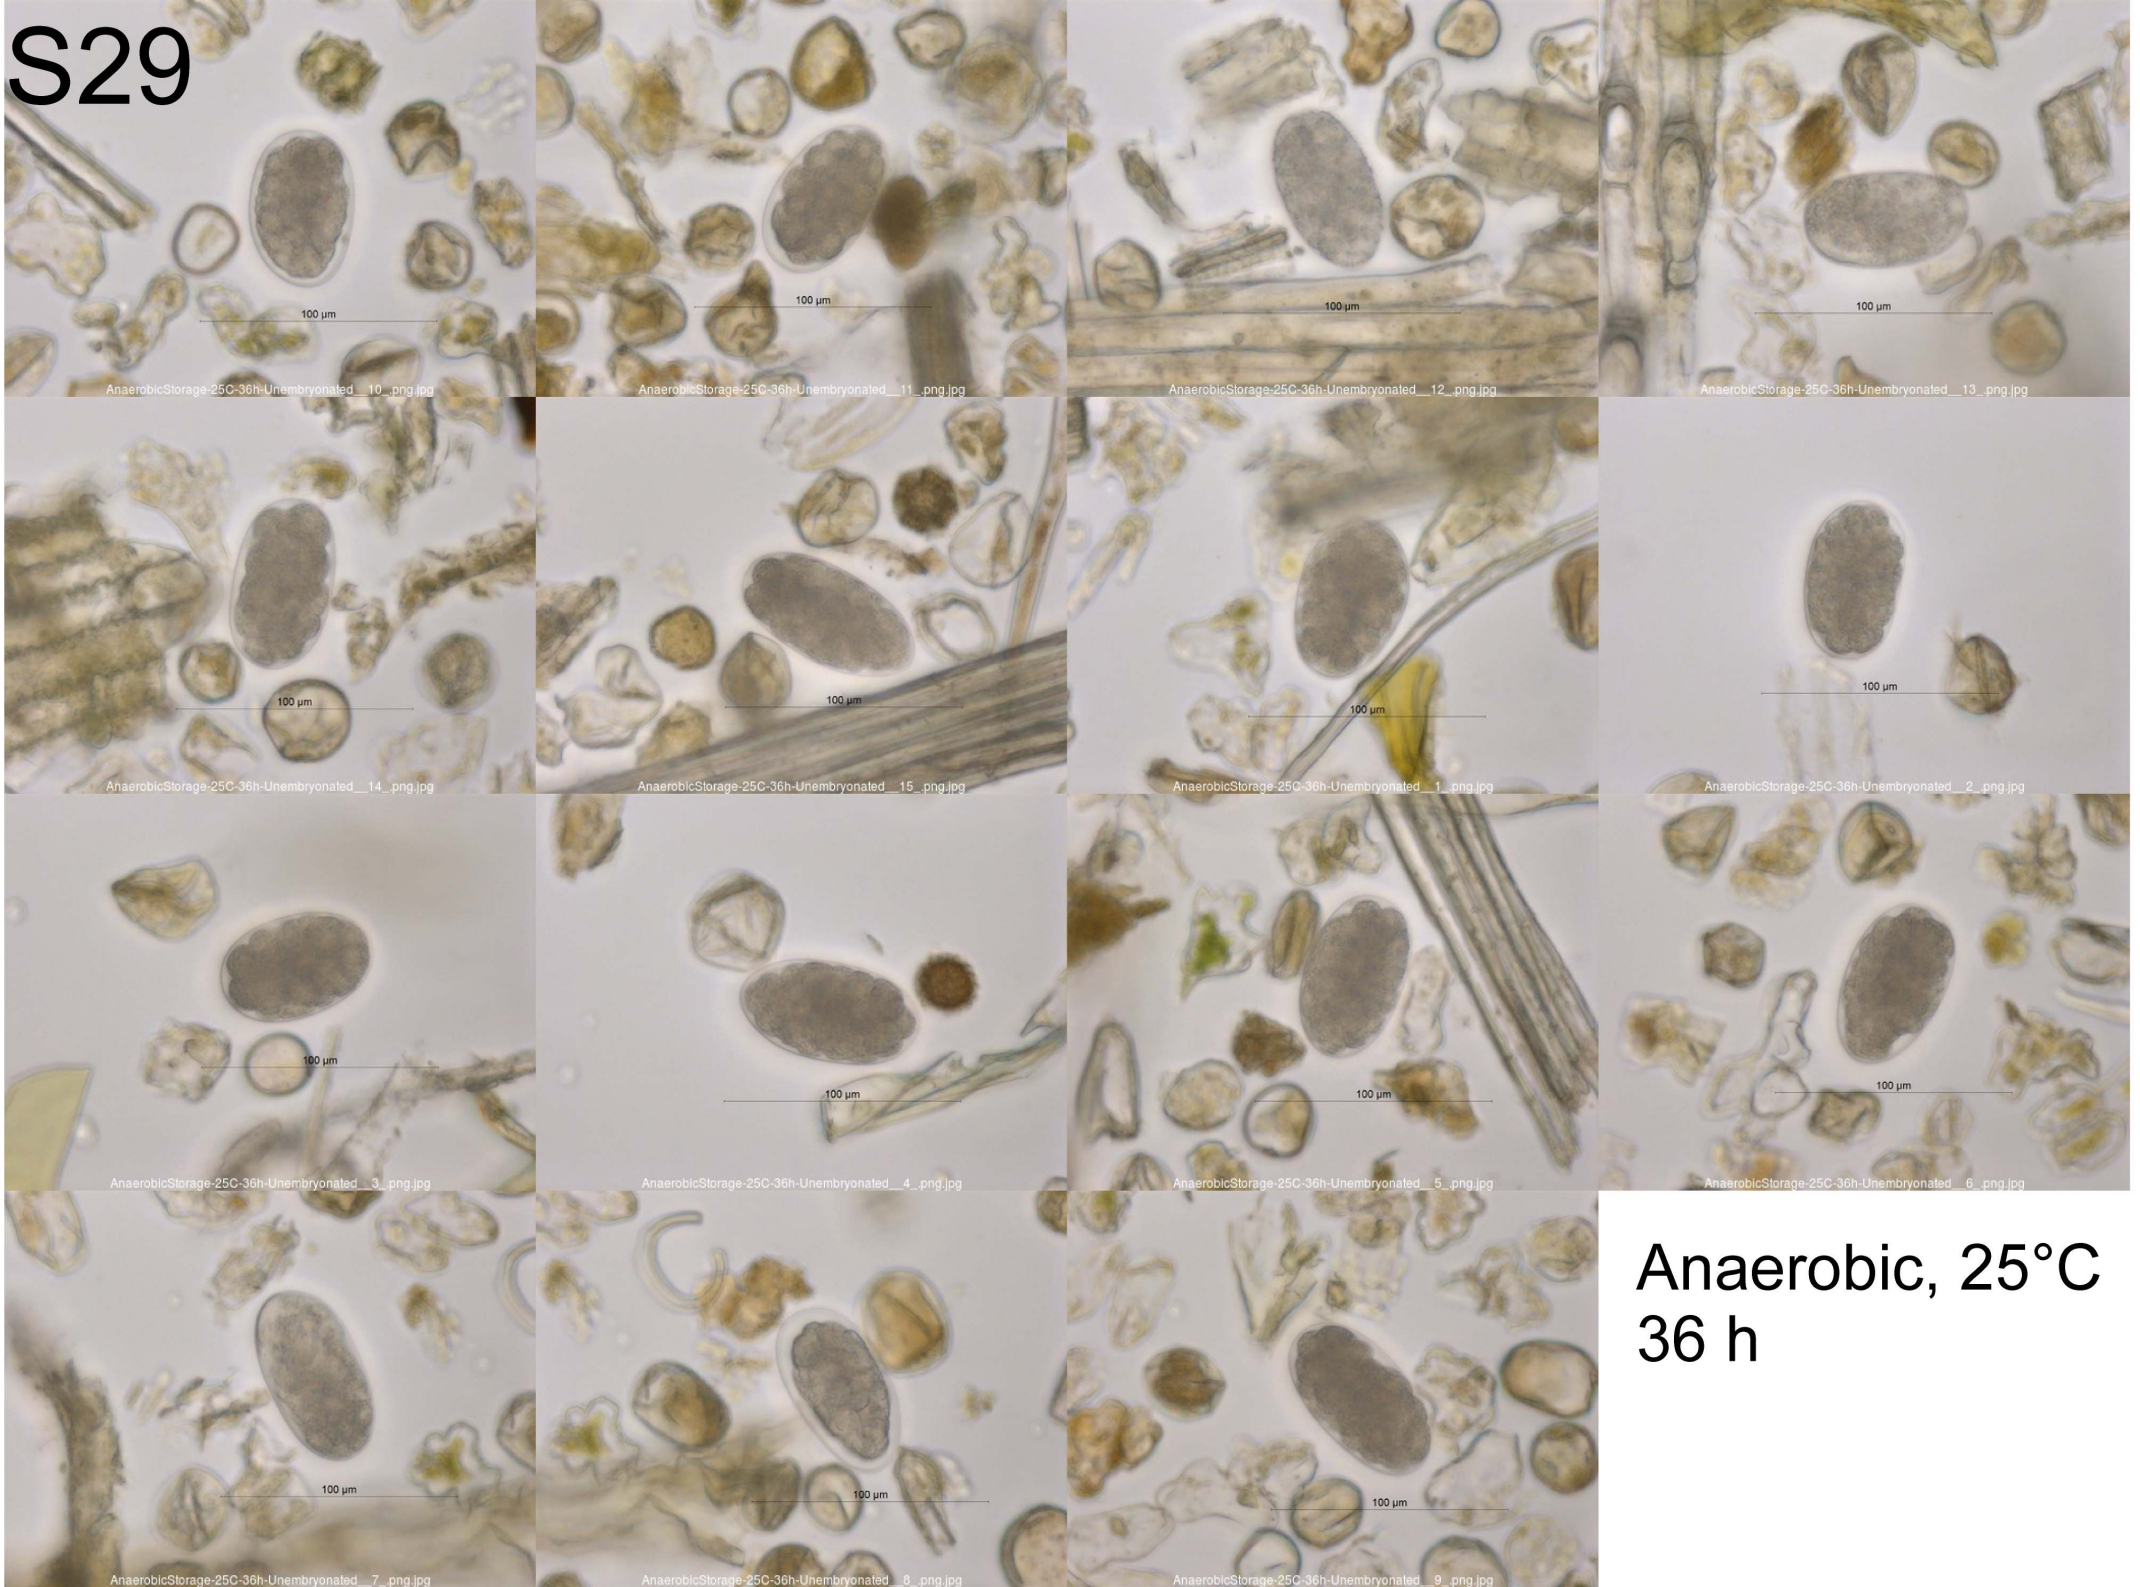

Anaerobic, 25°C  
36 h



# S30

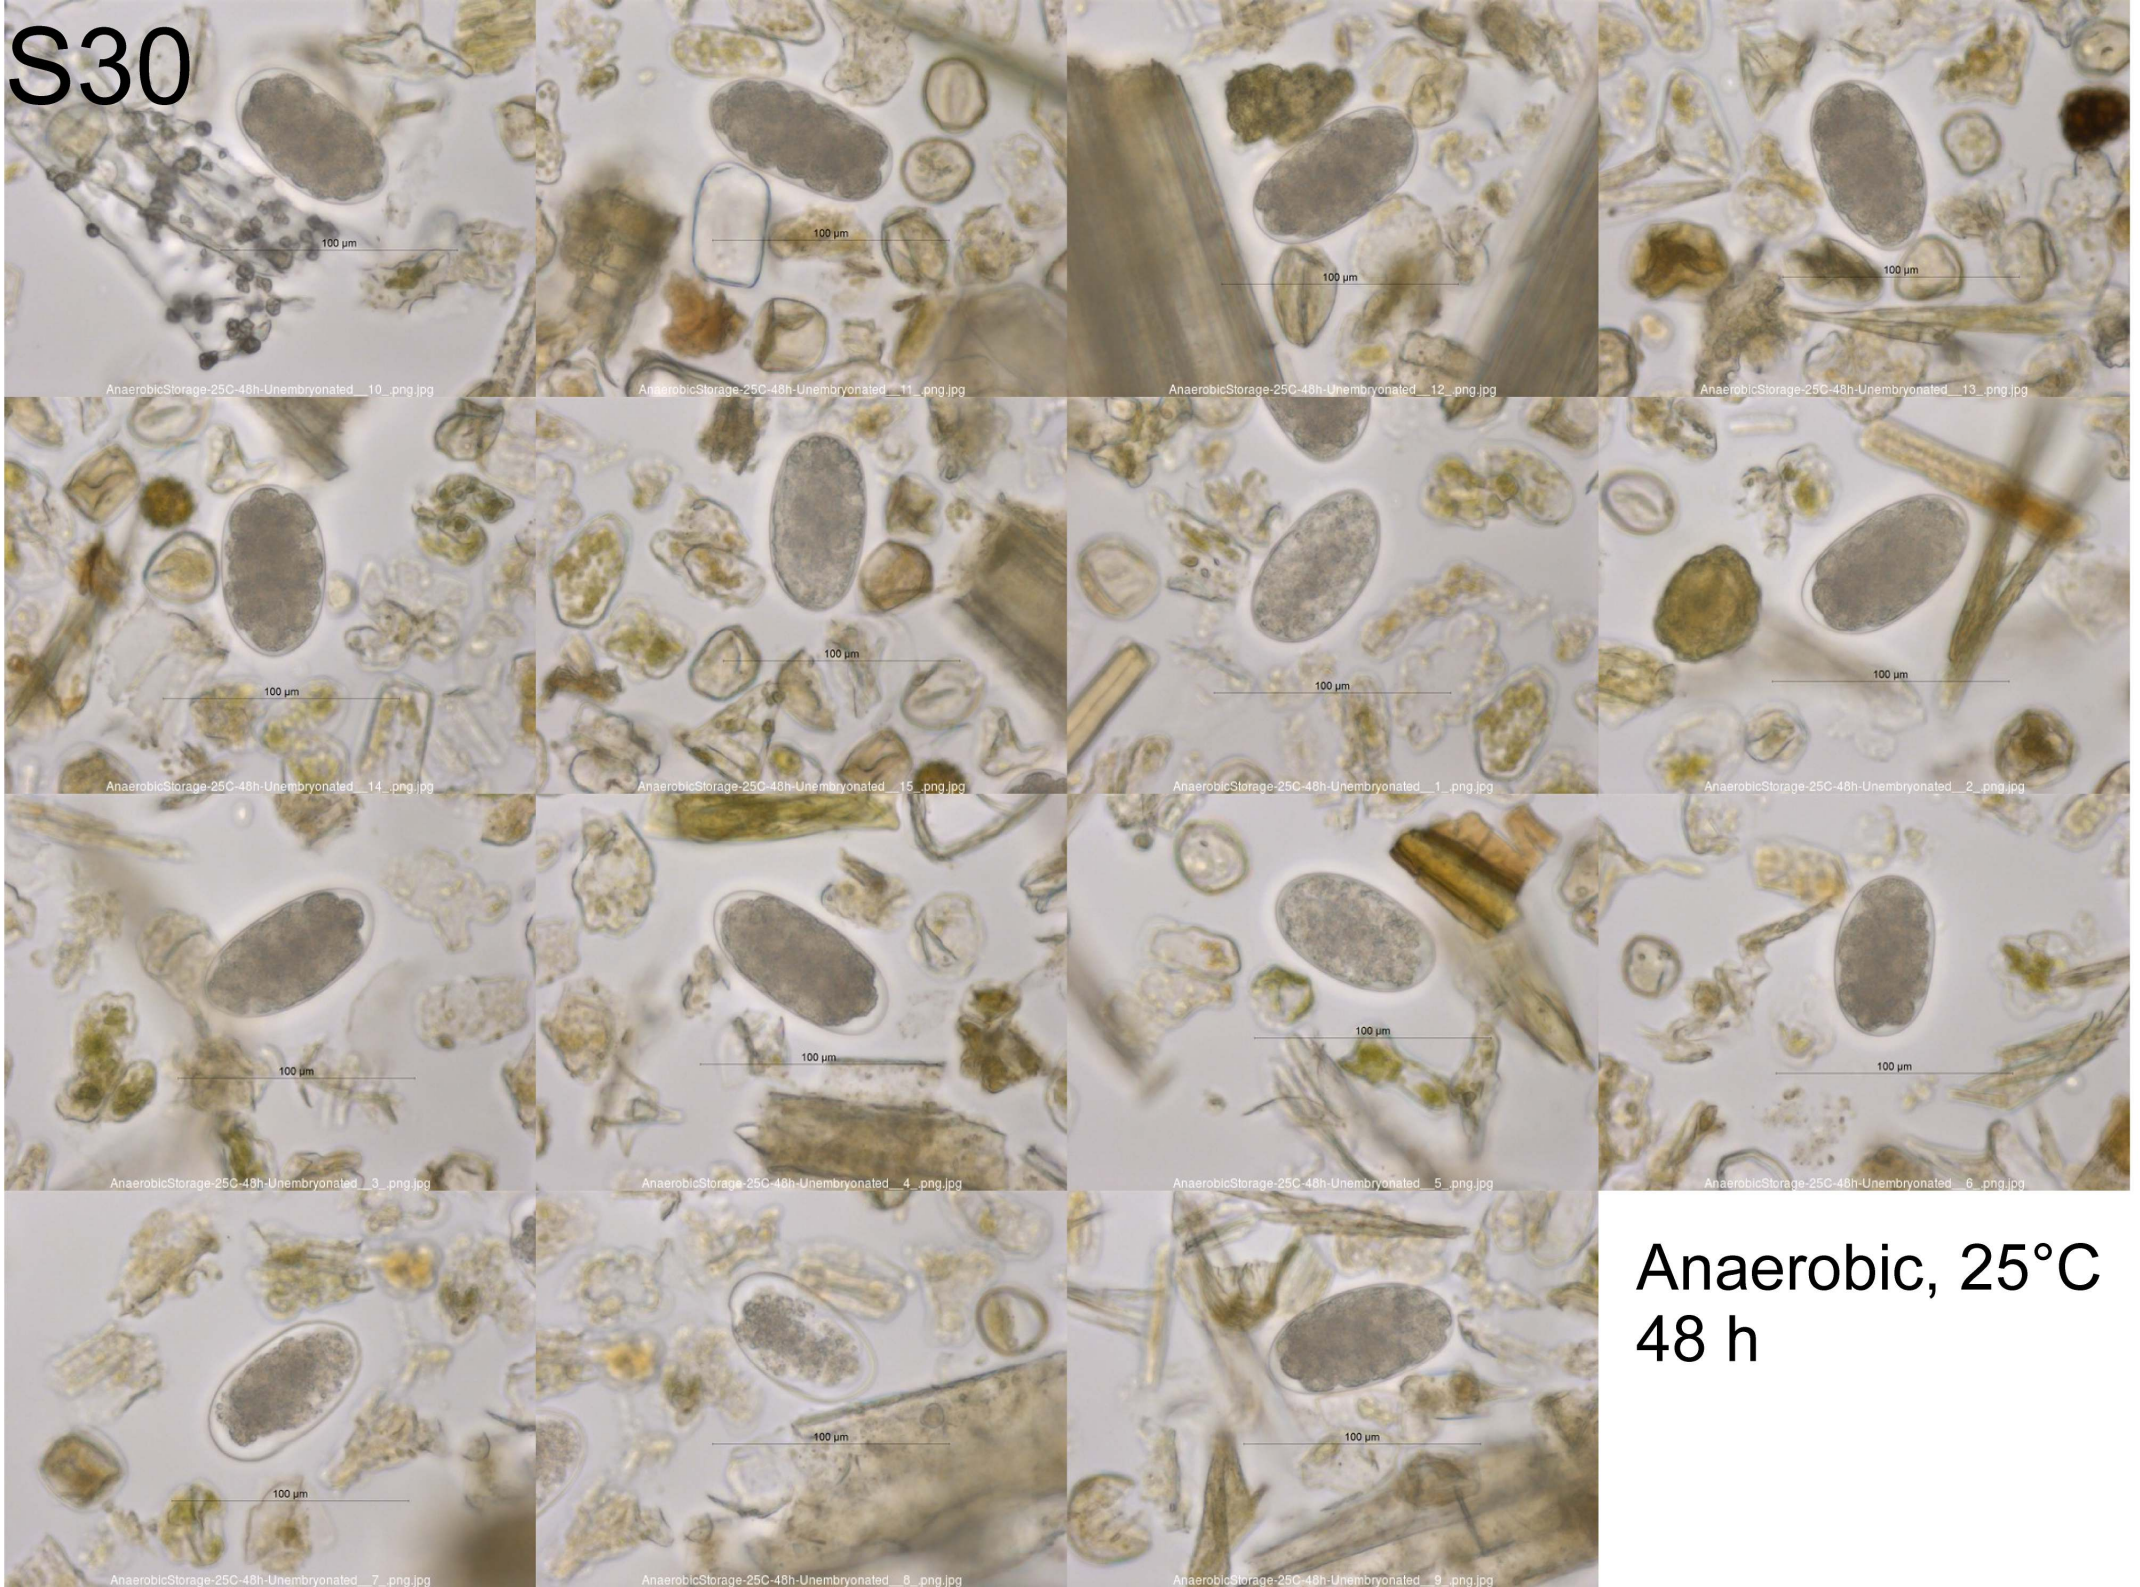

Anaerobic, 25°C  
48 h



# S31

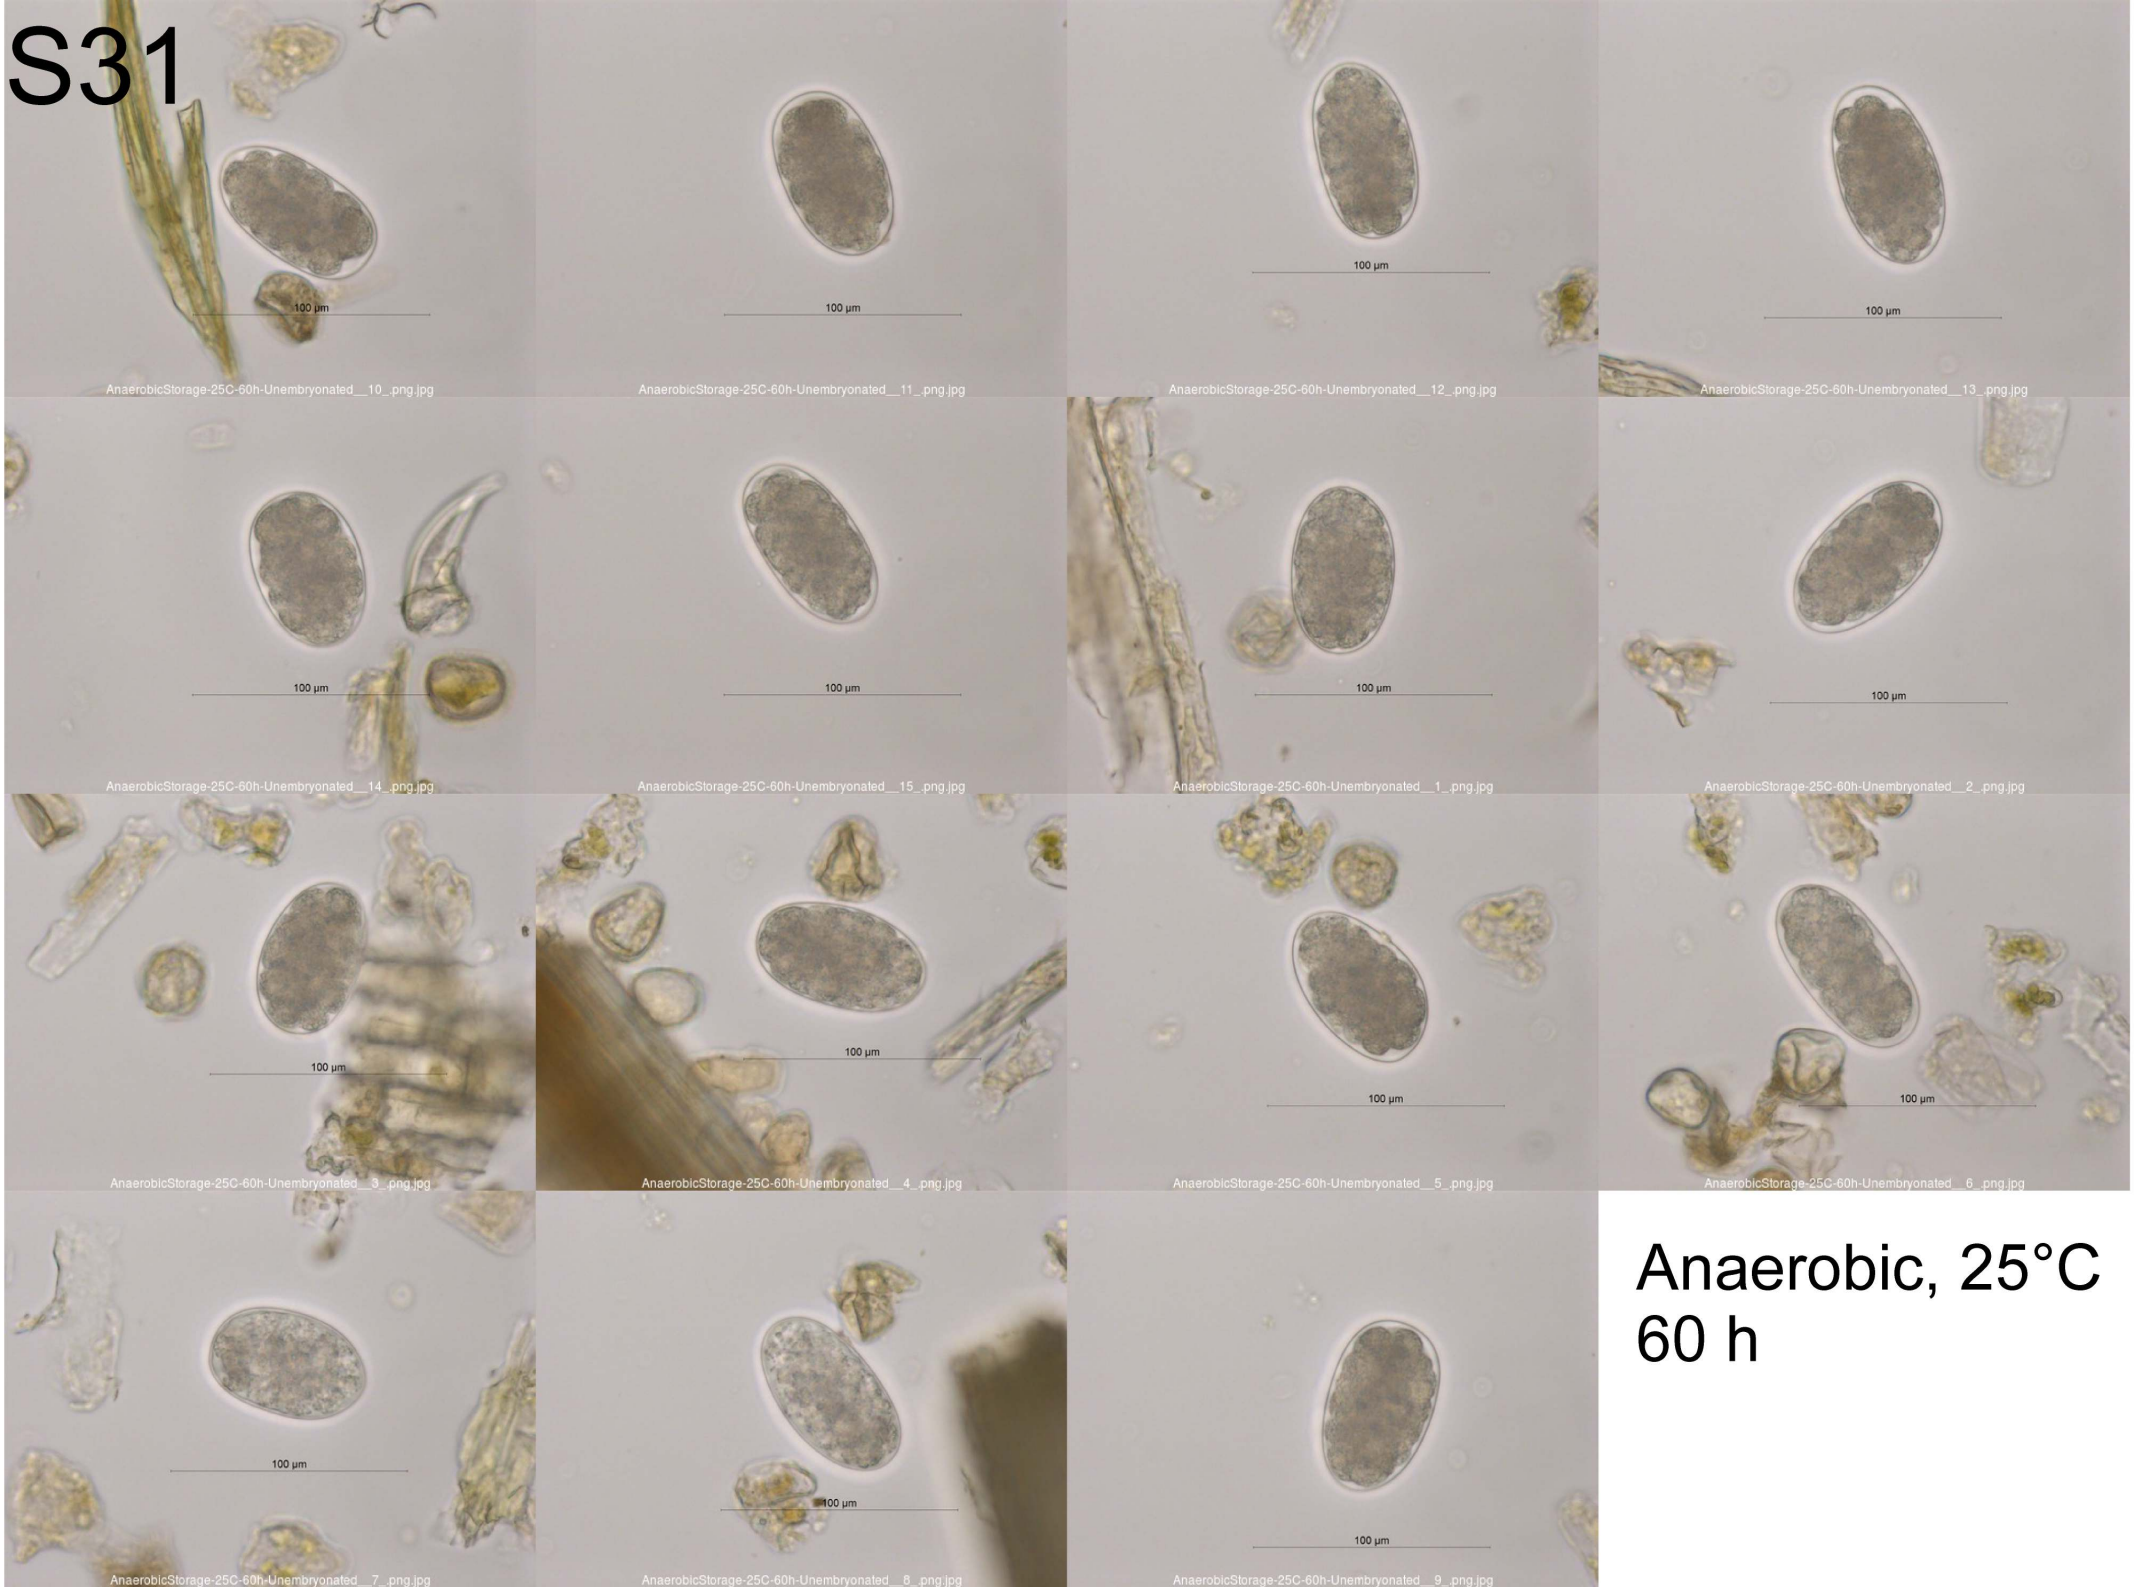

Anaerobic, 25°C  
60 h



S32

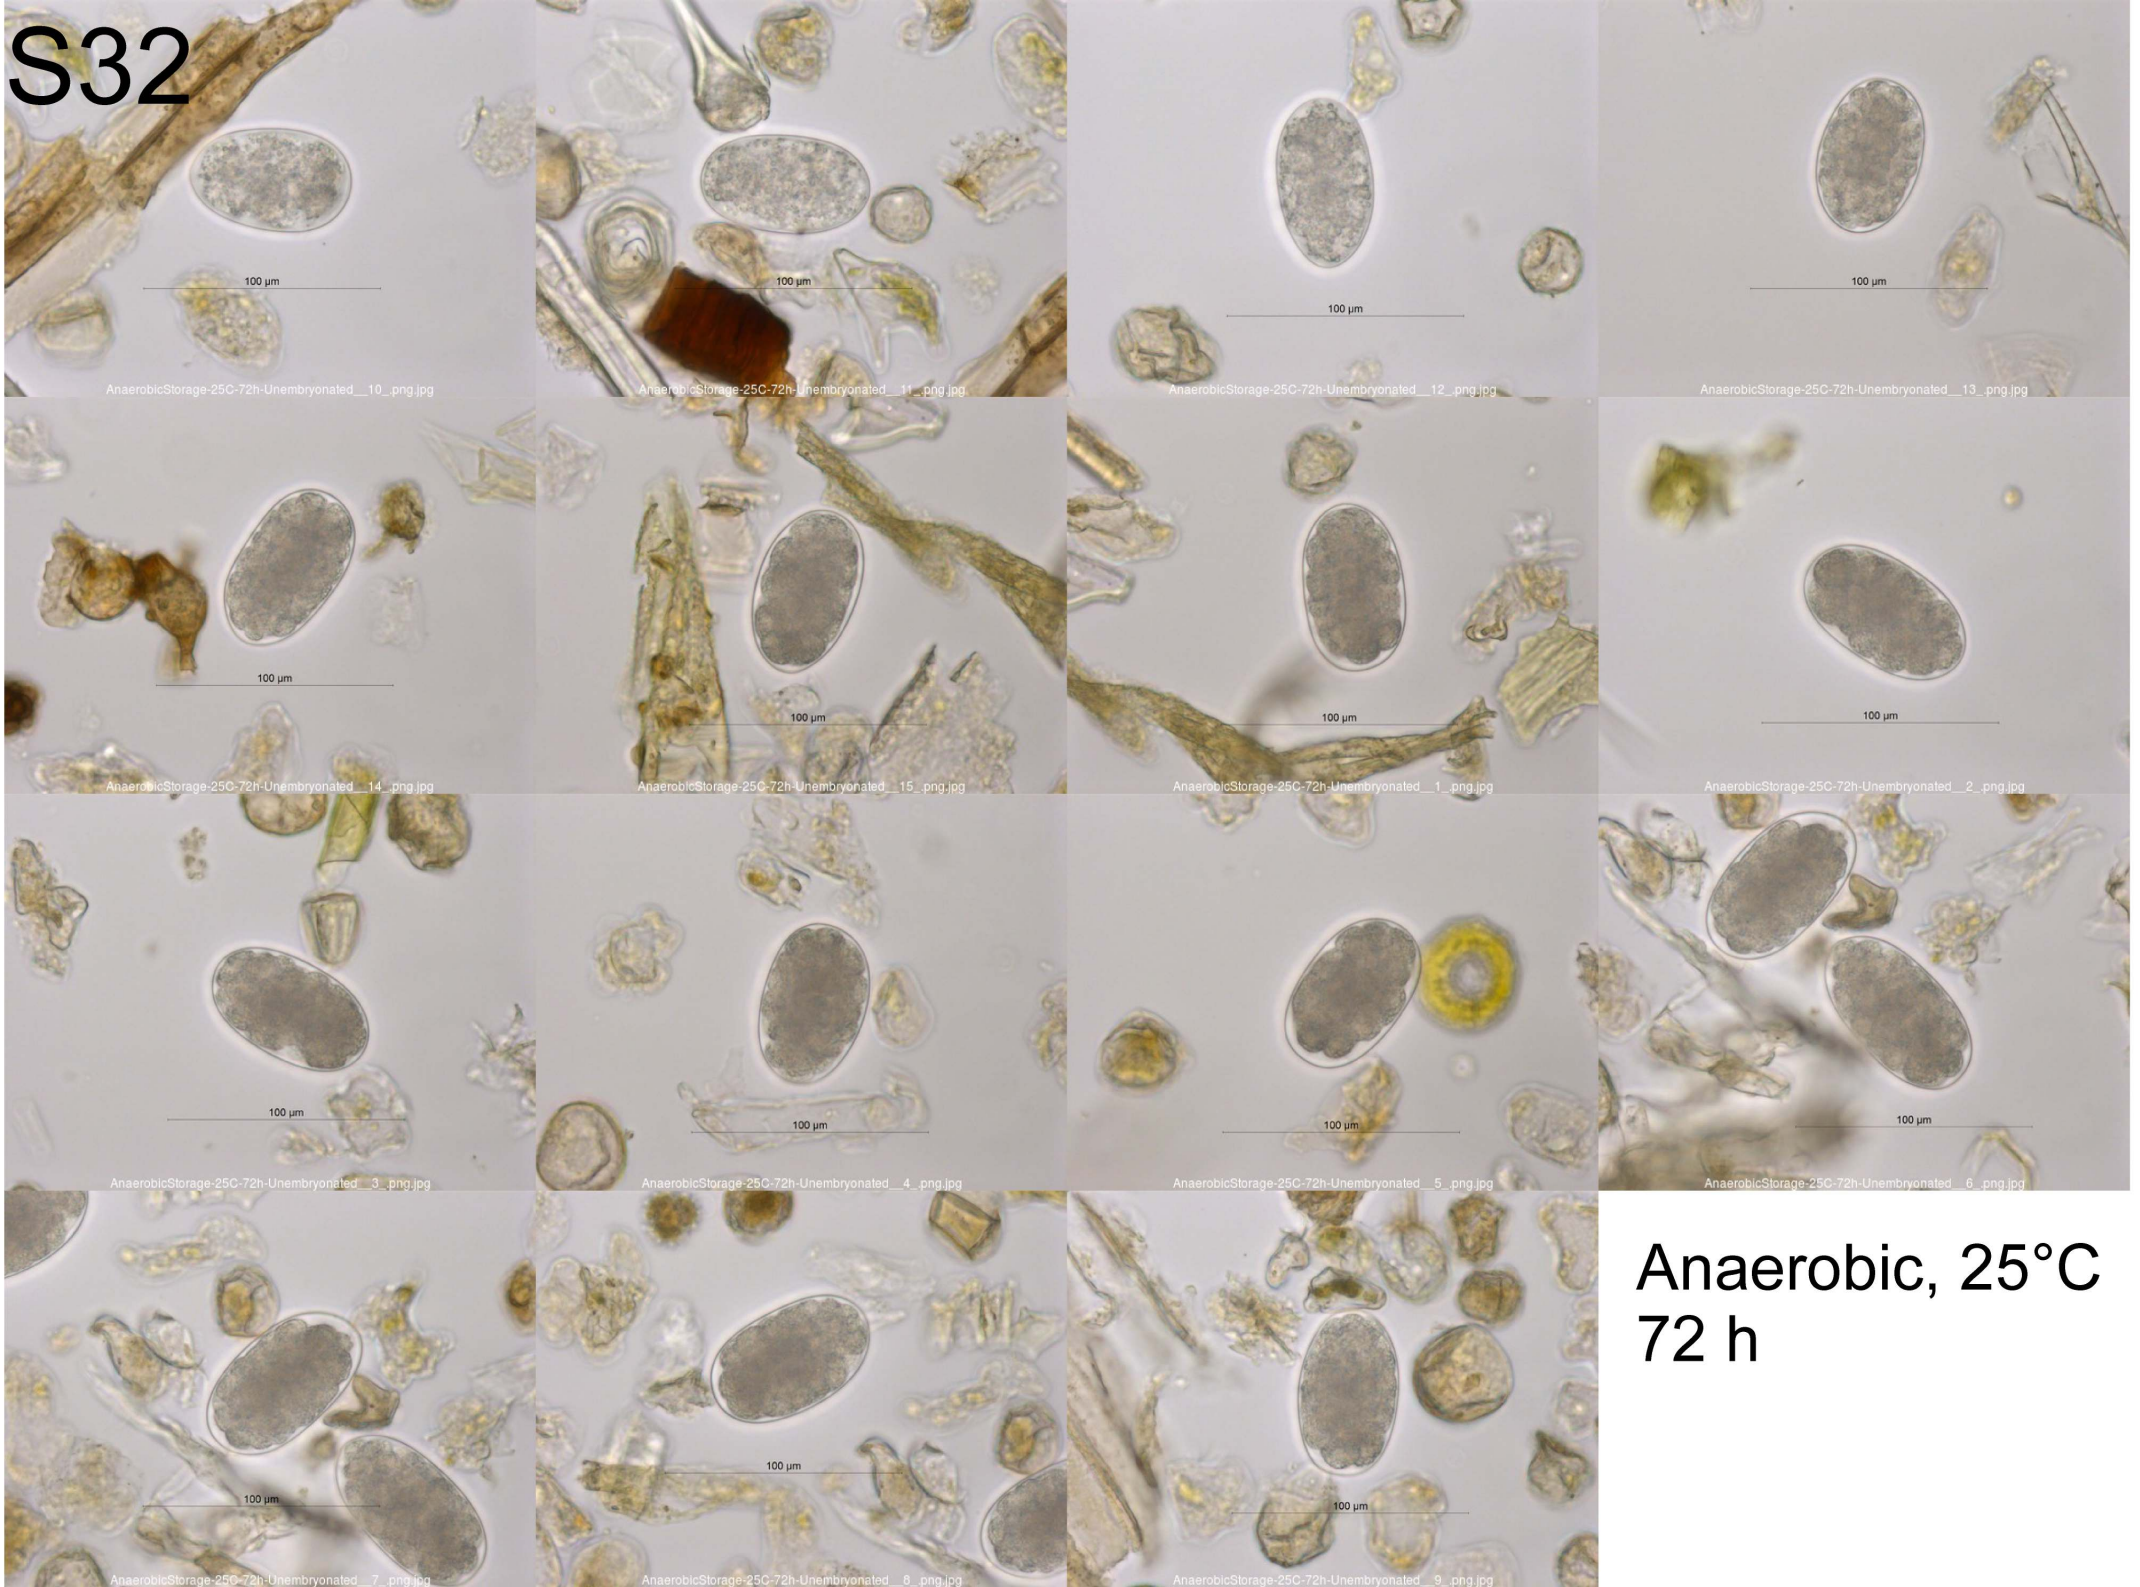

Anaerobic, 25°C  
72 h



# S33

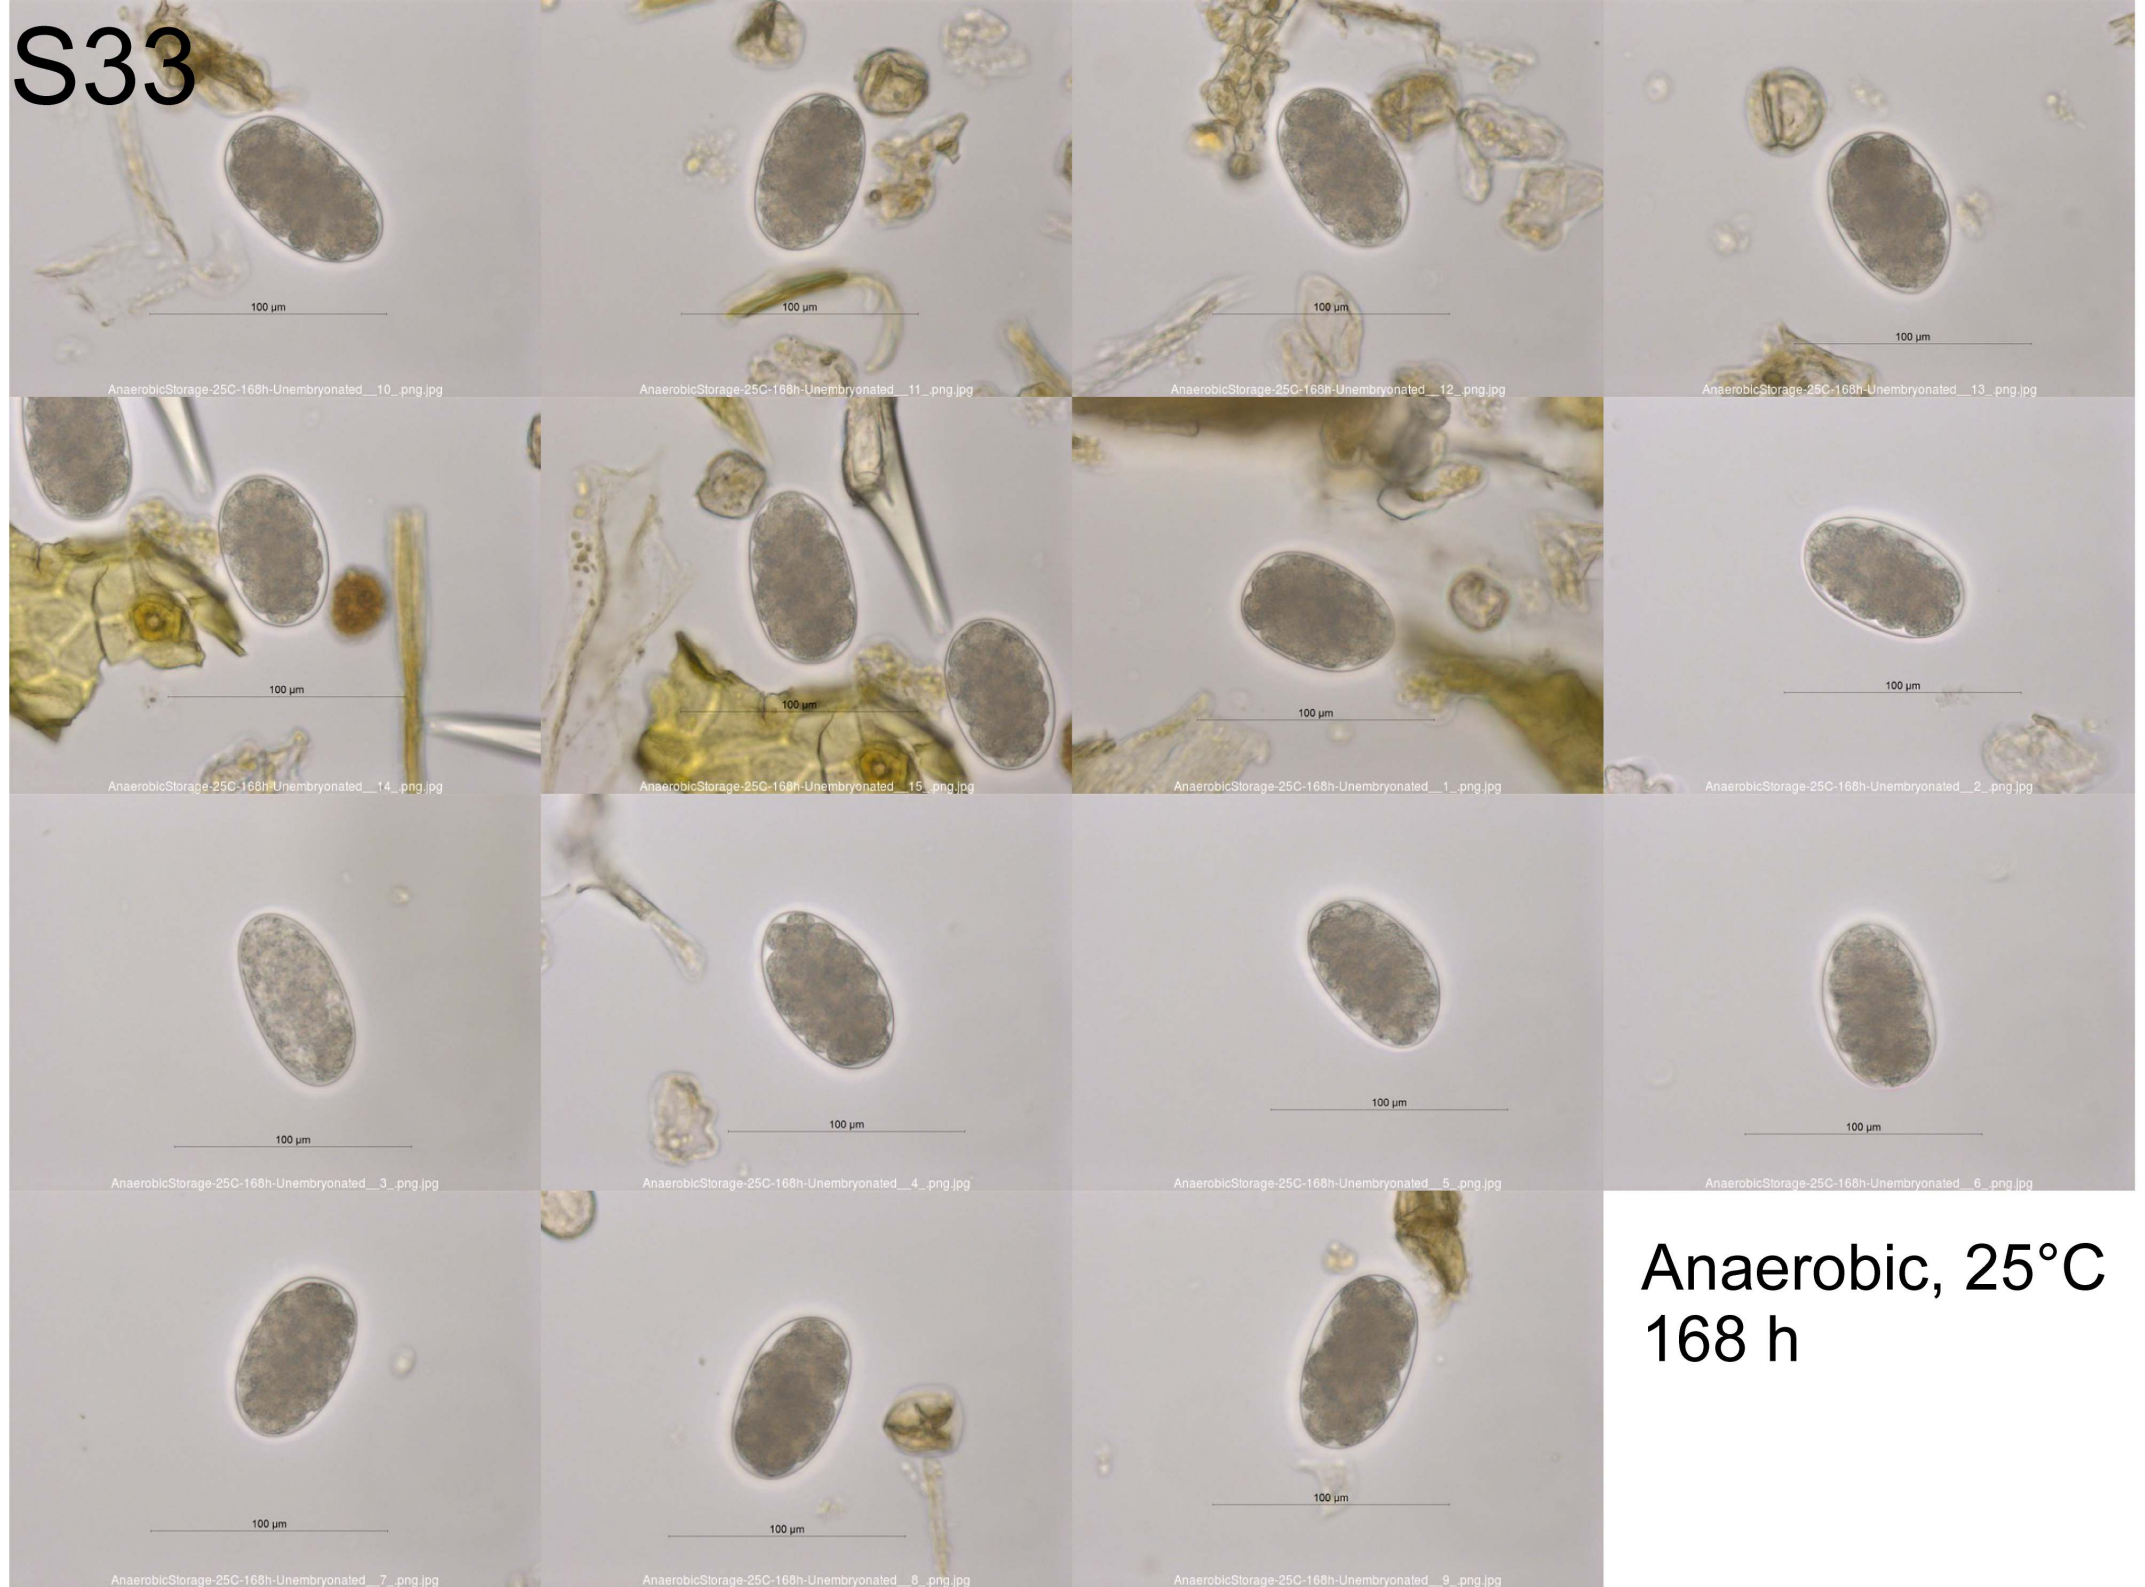

Anaerobic, 25°C  
168 h



# S34

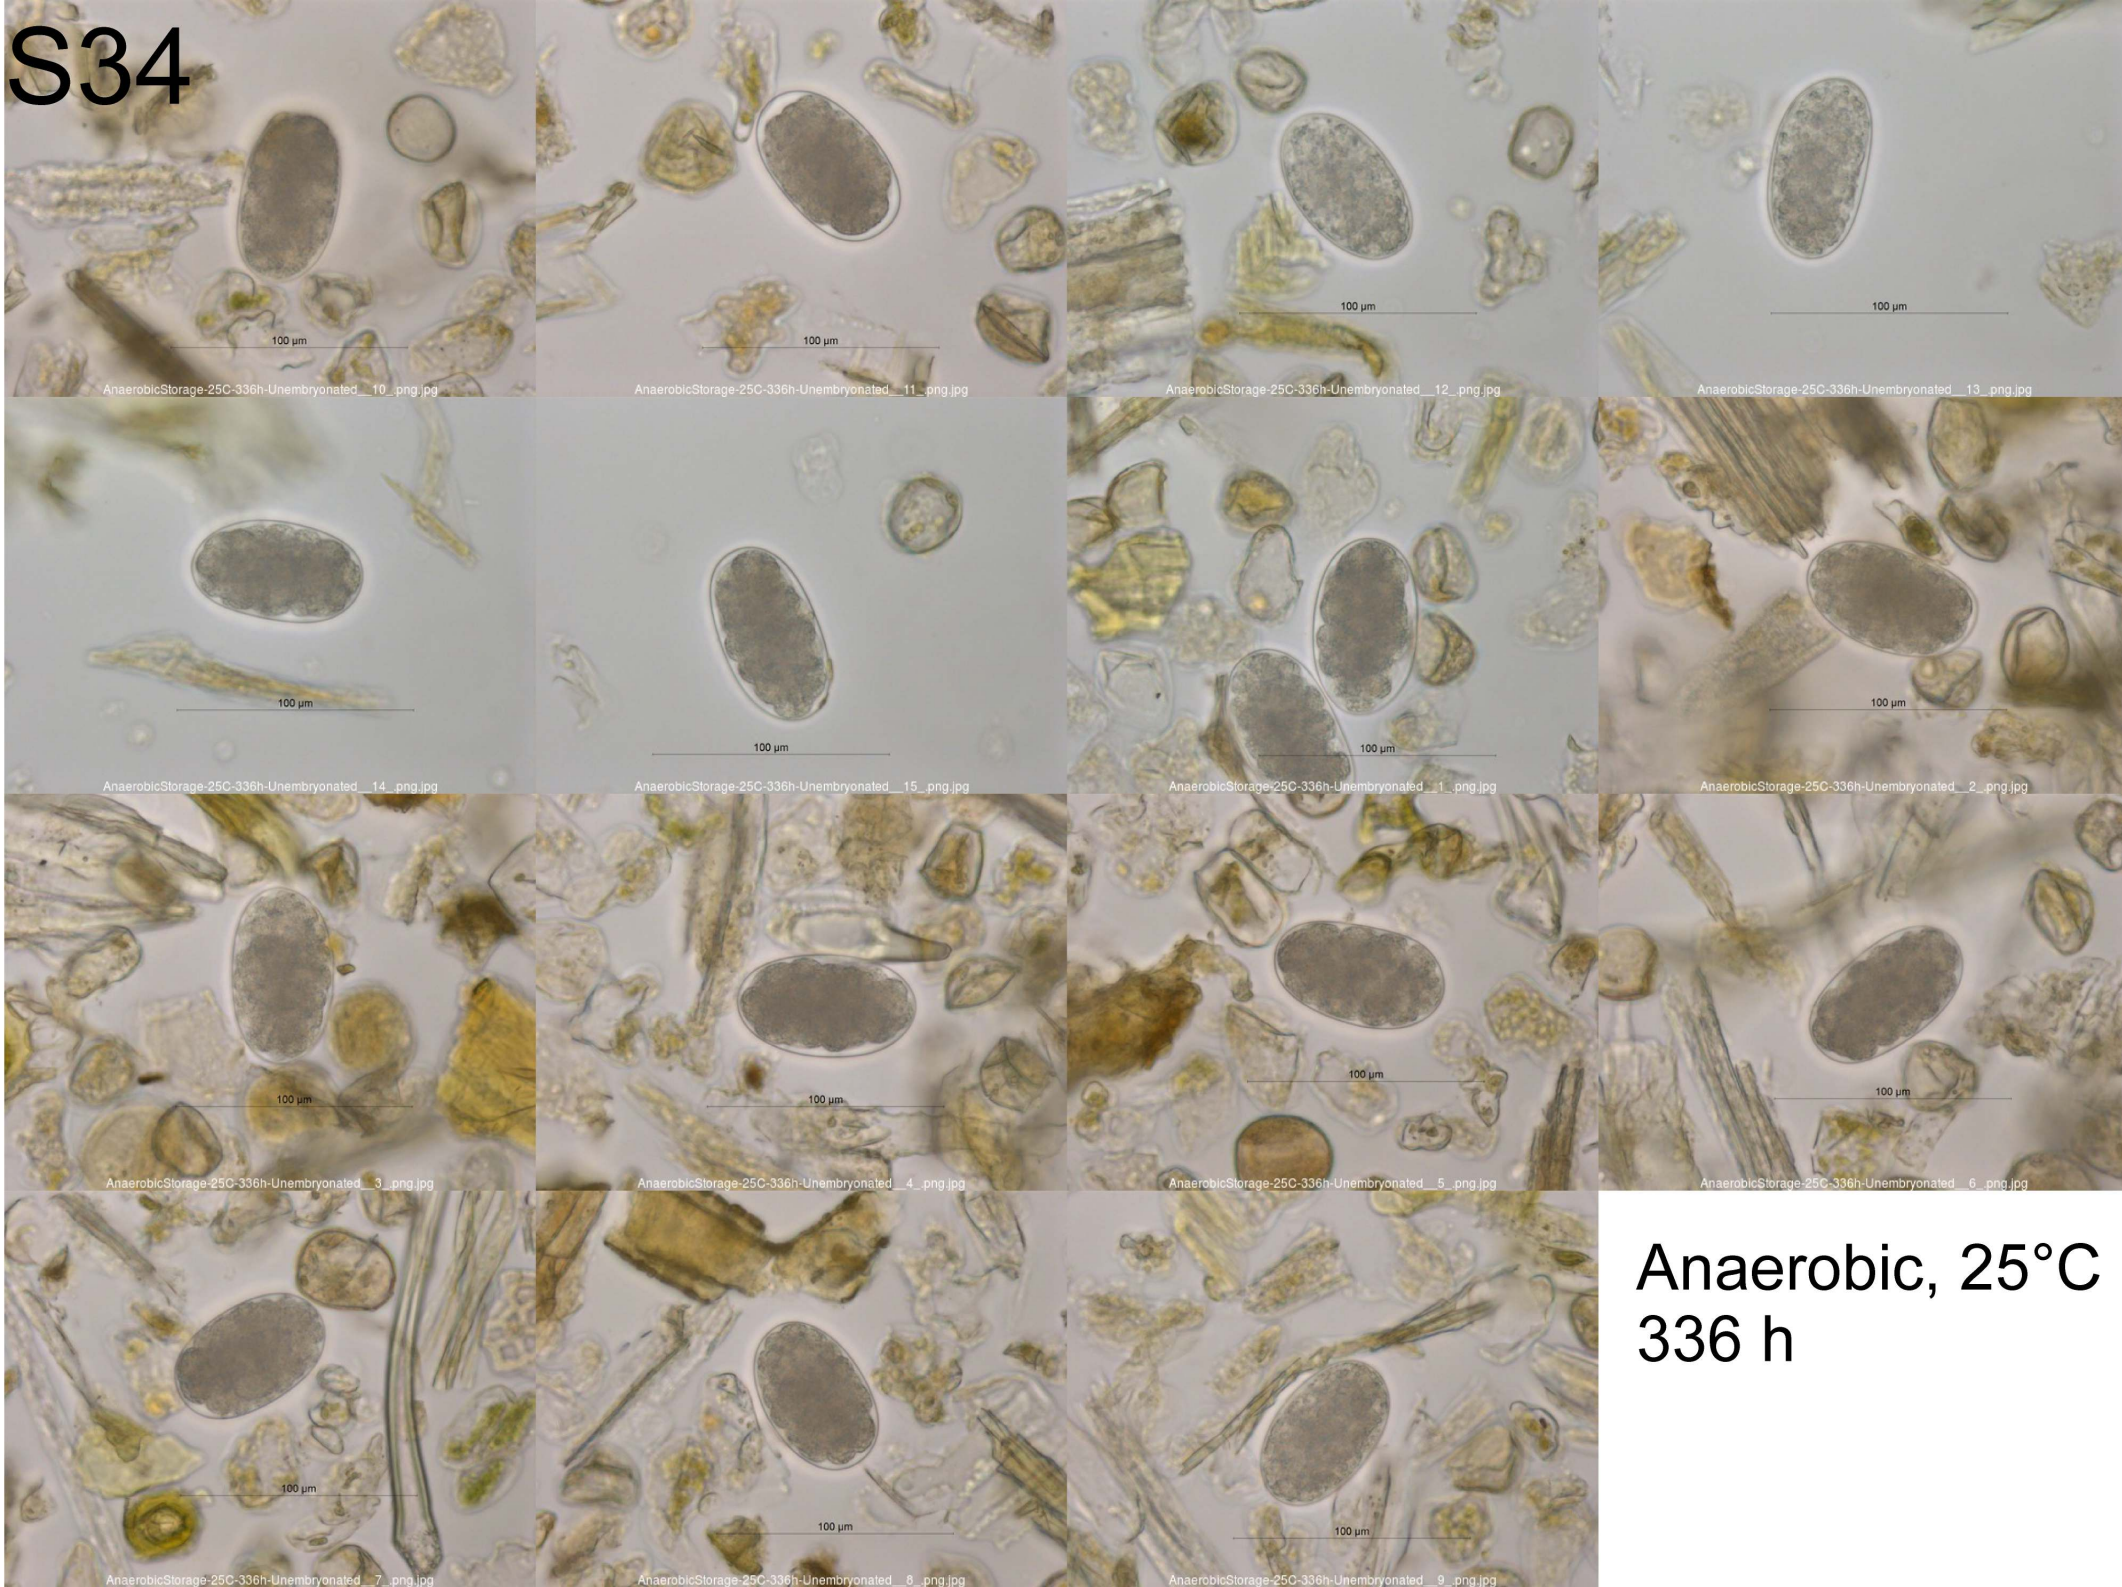

Anaerobic, 25°C  
336 h
